# Supplementary material for: Pathobiochemical signatures of cholestatic liver disease in bile duct ligated mice
Source: PubMed Central journal article supplement (PMC4654904; doi:10.1186/s12918-015-0229-0), 2015-11-20
Supplement: 12918_2015_229_MOESM1_ESM.pdf [file 12918_2015_229_MOESM1_ESM.pdf]

# Measurements in bile duct ligated mice

Andreas Hoppe, Kerstin Abshagen, Maria Thomas

September 16, 2014

## Contents

|          |                           |          |
|----------|---------------------------|----------|
| <b>1</b> | <b>Main factors</b>       | <b>2</b> |
| <b>2</b> | <b>RNA ADME genes</b>     | <b>3</b> |
| <b>3</b> | <b>RNA Fibrosis genes</b> | <b>5</b> |
| <b>4</b> | <b>RNA Zytokine genes</b> | <b>7</b> |

---

|                         |                                |
|-------------------------|--------------------------------|
| ALT, GLDH               | U/l                            |
| Bilirubin               | mmol/l                         |
| Albumin                 | mg/ml                          |
| area                    | percentage number, share       |
| BrdU <sup>+</sup> cells | n/mm <sup>2</sup> , cell count |
| SMA, CTGF, S100A4       | n/20x, cell count              |
| RNA                     | ratio to GAPDH expression      |

---

**Table 1** – units

# 1 Main factors

| ID                | ALT   | Albumin | Bilirubin | GLDH  | BrdU        |               |         | BrdU | BrdU  | Collagen | Infarct | SMA  | CTGF | S100A4 |
|-------------------|-------|---------|-----------|-------|-------------|---------------|---------|------|-------|----------|---------|------|------|--------|
|                   |       |         |           |       | hepatocytes | non-parenchym | Kupffer |      |       |          |         |      |      |        |
| IM 1 0h 17.12.09  | 26.5  | 21.2    | 1.49      | 16.3  | 0.08        | 0.28          | 0.09    | 0    | 1.38% | 0%       | n.m.    | n.m. | n.m. |        |
| IM 2 0h 17.12.09  | 27.6  | 26.1    | 0.93      | 9.3   | 0.04        | 0.1           | 0.13    | 0    | 1.18% | 0%       | n.m.    | n.m. | n.m. |        |
| IM 3 0h 06.01.10  | 28.6  | 23.8    | 1.65      | 8.4   | 0.02        | 0.38          | 0.16    | 0.01 | 1.21% | 0%       | 2       | 1    | 12   |        |
| IM 4 0h 06.01.10  | 28.6  | 17.8    | 0.85      | 10.4  | 0.03        | 1.33          | 0.11    | 0    | 1.88% | 0%       | 1       | 2    | 16   |        |
| IM 5 0h 06.01.10  | 33.2  | 19.2    | 0.53      | 20.6  | 0.13        | 0.4           | 0.13    | 0.03 | 2.65% | 0%       | 2       | 1    | 13   |        |
| IM 2 6h 11.12.09  | 410   | 40.6    | 25.8      | 516   | 0.44        | 0.44          | 0.19    | 0    | 1.36% | 0.19%    | 3       | 2    | 13   |        |
| IM 3 6h 11.12.09  | 661.8 | 30.8    | 13.9      | 734.4 | 0.03        | 0.22          | 0.11    | 0.03 | 0.39% | 0.15%    | n.m.    | n.m. | n.m. |        |
| IM 4 6h 11.12.09  | 772.9 | 19.1    | 10.7      | 1102  | 0.09        | 0.33          | 0.11    | 0.02 | 0.43% | 0%       | 6       | 1    | 17   |        |
| IM 3 6h 01.12.09  | 570.8 | 23.1    | 15.1      | 2220  | 0.03        | 0.36          | 0.11    | 0    | 0.45% | 0%       | 5       | 3    | 13   |        |
| IM 4 6h 01.12.09  | 249.8 | 20.1    | 8.96      | 652   | 0.09        | 0.52          | 0.23    | 0.02 | 0.12% | 0%       | n.m.    | n.m. | n.m. |        |
| IM 1 12h 08.12.09 | 678   | 24.6    | 31.5      | 1492  | 0.03        | 0.15          | 0.07    | 0    | 0.25% | 0.92%    | 15      | 9    | 15   |        |
| IM 2 12h 08.12.09 | 678   | 22.4    | 22.5      | 1340  | 0.02        | 0.25          | 0.1     | 0.1  | 1.78% | 0.46%    | 14      | 10   | 19   |        |
| IM 1 12h 11.12.09 | 799   | 27.9    | 39        | 1206  | 0.05        | 0.23          | 0.1     | 0.13 | 1.32% | 2.13%    | 12      | 6    | 18   |        |
| IM 1 12h 14.12.09 | 483   | 24      | 25.8      | 869   | 0.05        | 0.21          | 0.14    | 0.01 | 2.25% | 0.02%    | n.m.    | n.m. | n.m. |        |
| IM 2 12h 14.12.09 | 362   | 25.5    | 27.2      | 722   | 0.07        | 0.19          | 0.13    | 0.06 | 1.85% | 0%       | n.m.    | n.m. | n.m. |        |
| IM 1 18h 17.12.09 | 647   | 29.4    | 59.4      | 1520  | 0           | 0.07          | 0.07    | 0.01 | 0.76% | 0.26%    | n.m.    | n.m. | n.m. |        |
| IM 2 18h 17.12.09 | 296.5 | 39.7    | 34        | 2836  | 0.03        | 0.14          | 0.09    | 0.03 | 1.4%  | 0.12%    | 23      | 17   | 23   |        |
| IM 3 18h 17.12.09 | 604.5 | 36.9    | 55.8      | 1526  | 0.02        | 0.14          | 0.08    | 0    | 0.35% | 2.18%    | 34      | 16   | 25   |        |
| IM 4 18h 26.11.09 | 946   | 24.5    | 90.1      | 3140  | 0.1         | 0.2           | 0.06    | 0    | 1.53% | 1.75%    | 17      | 19   | 20   |        |
| IM 5 18h 26.11.09 | 508.5 | 24.9    | 43.3      | 1546  | 0.06        | 0.18          | 0.09    | 0    | 0.66% | 3.22%    | n.m.    | n.m. | n.m. |        |
| IM 1 30h 08.01.10 | 524   | 22.4    | 47.1      | 1048  | 0.07        | 1.06          | 0.93    | 0.08 | 3.9%  | 1.32%    | 45      | 19   | 25   |        |
| IM 2 30h 08.01.10 | 346   | 17      | 32.3      | 331   | 0.17        | 0.64          | 0.24    | 0.04 | 0.59% | 0.28%    | 69      | 20   | 29   |        |
| IM 3 30h 08.01.10 | 1146  | 23.5    | 84        | 3794  | 0           | 0.05          | 0.04    | 0.01 | 0.85% | 2.55%    | n.m.    | n.m. | n.m. |        |
| IM 3 30h 15.12.09 | 895   | 20.9    | 92.7      | 2134  | 0.04        | 0.6           | 0.31    | 0.15 | 1.13% | 3.07%    | 18      | 14   | 32   |        |
| IM 4 30h 15.12.09 | 243   | 47.2    | 84        | 802   | 0.02        | 1.15          | 0.97    | 0.09 | 1.32% | 3.17%    | n.m.    | n.m. | n.m. |        |
| IM 1 2d 03.12.09  | 473.5 | 23.8    | 109       | 602.2 | 0.97        | 3.37          | n.m.    | n.m. | 0.95% | 4.89%    | 51      | 36   | 54   |        |
| IM 2 2d 03.12.09  | 976.9 | 23.8    | 144.2     | 1084  | 0.23        | 2.48          | 1.58    | 0.75 | 1.61% | 2.01%    | 76      | 41   | 61   |        |
| IM 3 2d 10.12.09  | 314.6 | 25.9    | 79.1      | 554.8 | 1.56        | 1.78          | 1.47    | 0.4  | 0.65% | 1.43%    | 32      | 42   | 40   |        |
| IM 4 2d 10.12.09  | 160   | 46      | 85.1      | 670   | 0.04        | 0.44          | 0.12    | 0.1  | 0.24% | 1.27%    | n.m.    | n.m. | n.m. |        |
| IM 5 2d 10.12.09  | 236.9 | 25.6    | 66        | 542   | 0.2         | 3.05          | 1.49    | 0.4  | 0.75% | 0.34%    | n.m.    | n.m. | n.m. |        |
| IM 1 5d 21.04.10  | 281.1 | 29.1    | 241       | 172.7 | 0.47        | 4.13          | 1.31    | 1.52 | 1.75% | 1.38%    | n.m.    | n.m. | n.m. |        |
| IM 2 5d 21.04.10  | 945.2 | 29.4    | 249.8     | 216.9 | 0.92        | 3.84          | 0.7     | 1.2  | 0.8%  | 11.7%    | 89      | 66   | 44   |        |
| IM 3 5d 21.04.10  | 587.4 | 27.7    | 192.5     | 390   | 0.54        | 3.02          | 1.25    | 2.08 | 1.12% | 4.62%    | 83      | 53   | 47   |        |
| IM 4 5d 07.12.09  | n.m.  | n.m.    | n.m.      | n.m.  | 0.64        | 4.52          | 1.09    | n.m. | n.m.  | n.m.     | n.m.    | n.m. | n.m. |        |
| IM 5 5d 21.04.10  | 324.9 | 29.7    | 373.2     | 486.6 | 0.58        | 3.34          | 0.93    | 1.63 | 5.9%  | 0.88%    | 45      | 41   | 55   |        |
| IM 4 5d 21.04.10  | 675   | 42.6    | 279.7     | 321.9 | 1.94        | 3.41          | 0.57    | 1.85 | 1.39% | 5.82%    | n.m.    | n.m. | n.m. |        |
| IM 1 14d 09.12.09 | 157   | 35      | 401.5     | 246   | 0.06        | 2.03          | 0.59    | 1.35 | 2.72% | 8.4%     | 112     | 79   | 51   |        |
| IM 2 14d 09.12.09 | 153   | 28.4    | 210       | 117   | 0           | 0.13          | 0.12    | 0    | 6.71% | 5.01%    | n.m.    | n.m. | n.m. |        |
| IM 3 14d 09.12.09 | 93    | 30.4    | 368       | 123   | 0.13        | 1.54          | 0.31    | 1.62 | 5.86% | 6.4%     | 123     | 85   | 55   |        |
| IM 1 14d 16.12.09 | 235   | 41.6    | 239.9     | 108   | 0.62        | 4.52          | 1.32    | 2.24 | 4.44% | 5.09%    | n.m.    | n.m. | n.m. |        |
| IM 2 14d 16.12.09 | 199   | 23.7    | 319.5     | 68    | 0.54        | 6.53          | 1.41    | 2.17 | 7.21% | 1.49%    | 87      | 87   | 55   |        |

## 2 RNA ADME genes

| ID                | Ppara | Cyp3a11 | Cyp24a1 | Nos2 | Nfkbia | Cyp2c39 | Nr3c1 | Cyp1a2 | Abcb1a | Sult1b1 | Gstp1 | Cxcl15 | Cebpa | Nr1h3 | Sod2 | Sult1a1 | Gstm1 | Cyp4a10 | Hmox1 | Ahr  | Cebpd | Slc10a1 | Gsta2 | Dpyd |      |
|-------------------|-------|---------|---------|------|--------|---------|-------|--------|--------|---------|-------|--------|-------|-------|------|---------|-------|---------|-------|------|-------|---------|-------|------|------|
| IM 1 0h 17.12.09  | 1.42  | 0.89    | 9.76    | 0.4  | 0.18   | 0.25    | 0.92  | 2.47   | 0.16   | 1.21    | 1.14  | 0.004  | 1.4   | 0.66  | 0.7  | 0.48    | 0.54  | 2.5     | 0.46  | 0.56 | 0.49  | 1.53    | 0.67  | 1.14 |      |
| IM 2 0h 17.12.09  | 2.03  | 0.87    | 0.14    | 0.36 | 14.3   | 0.68    | 1.47  | 3.19   | 0.43   | 2.54    | 1.36  | 191.8  | 2.47  | 1.32  | 1.13 | 0.63    | 0.82  | 2.36    | 0.43  | 0.96 | 1     | 2.2     | 0.9   | 1.49 |      |
| IM 3 0h 06.01.10  | 1.8   | 1.07    | 9.5     | 0.47 | 0.23   | 0.39    | 0.93  | 2.58   | 0.52   | 1.46    | 1.42  | 0.28   | 1.91  | 0.98  | 1.01 | 0.56    | 0.38  | 1.47    | 0.53  | 0.7  | 0.33  | 1.74    | 0.68  | 1.01 |      |
| IM 4 0h 06.01.10  | 2.59  | 0.6     | 0.9     | 2.78 | 91.9   | 1.59    | 1.77  | 2.67   | 1.76   | 3.12    | 1.2   | 1465   | 1.9   | 1.38  | 1.34 | 0.7     | 0.73  | 2.16    | 0.55  | 1.12 | 2.03  | 2.36    | 1.19  | 1.4  |      |
| IM 5 0h 06.01.10  | 1.56  | 0.5     | 0.37    | 0.09 | 0.1    | 0.31    | 0.9   | 2.13   | 0.25   | 0.95    | 1.51  | 0.0005 | 1.27  | 0.82  | 0.86 | 0.54    | 0.41  | 0.16    | 0.27  | 0.73 | 0.77  | 1.41    | 0.23  | 1.13 |      |
| IM 2 6h 11.12.09  | 2.02  | 0.83    | 2819    | 10.3 | 304.2  | 2.9     | 1.88  | 2.06   | 2.75   | 3.24    | 1.26  | 4897   | 1.76  | 1.58  | 1.28 | 0.94    | 0.59  | 8.02    | 1.93  | 1.25 | 5.92  | 1.47    | 0.67  | 1.18 |      |
| IM 3 6h 11.12.09  | 1.41  | 0.72    | 3663    | 12.8 | 346.2  | 3.34    | 1.84  | 2.02   | 3.72   | 3.5     | 1.06  | 6443   | 1.47  | 1.6   | 1.5  | 1.23    | 0.69  | 4.5     | 2.2   | 1.39 | 5.35  | 1.25    | 1.29  | 1.3  |      |
| IM 4 6h 11.12.09  | 1.23  | 0.77    | 1442    | 3.8  | 150.2  | 1.63    | 1.36  | 2.07   | 2.17   | 2.75    | 1.09  | 2231   | 1.1   | 1.11  | 1.22 | 1.23    | 0.7   | 4.08    | 2.17  | 0.98 | 2.76  | 1.41    | 0.75  | 1.2  |      |
| IM 3 6h 01.12.09  | 1.17  | 0.96    | 125.7   | 0.26 | 0.01   | 0.28    | 0.73  | 2.09   | 0.17   | 0.92    | 1.15  | 0.1    | 1.12  | 0.7   | 0.77 | 0.69    | 0.47  | 4.05    | 0.91  | 0.72 | 0.79  | 1.21    | 0.49  | 0.99 |      |
| IM 4 6h 01.12.09  | 1.49  | 0.94    | 403.3   | 0.03 | 0.64   | 0.4     | 0.93  | 2.67   | 0.2    | 1.43    | 1.36  | 0.37   | 1.52  | 0.82  | 0.88 | 0.67    | 0.7   | 2.88    | 0.59  | 0.73 | 0.66  | 1.76    | 0.61  | 1.22 |      |
| IM 1 12h 08.12.09 | 0.83  | 1.01    | 0.24    | 1.69 | 0.29   | 1.02    | 0.94  | 1.52   | 1.39   | 0.93    | 0.95  | 0.23   | 1.01  | 0.99  | 1.29 | 1.28    | 0.58  | 1.52    | 1.51  | 0.67 | 0.78  | 1.45    | 0.43  | 1.01 |      |
| IM 2 12h 08.12.09 | 1.19  | 0.8     | 0.33    | 1.51 | 0.31   | 0.68    | 0.89  | 1.76   | 0.91   | 1       | 1.19  | 0.17   | 1.05  | 0.86  | 1.02 | 0.87    | 0.61  | 1.47    | 0.99  | 0.67 | 0.69  | 1.83    | 0.5   | 0.92 |      |
| IM 1 12h 11.12.09 | 1.15  | 0.58    | 0.02    | 0.49 | 0.24   | 0.77    | 0.82  | 1.25   | 1.04   | 0.81    | 1.1   | 0.01   | 0.78  | 0.95  | 1    | 1.14    | 0.49  | 0.86    | 0.61  | 0.81 | 0.75  | 0.98    | 0.42  | 0.78 |      |
| IM 1 12h 14.12.09 | 1.55  | 0.44    | 0.99    | 1.35 | 0.54   | 0.71    | 0.9   | 1.31   | 1.3    | 0.8     | 0.82  | 0.86   | 0.97  | 0.92  | 0.98 | 1.05    | 0.43  | 3.02    | 1.35  | 0.67 | 0.8   | 1.39    | 0.36  | 0.86 |      |
| IM 2 12h 14.12.09 | 0.94  | 0.59    | 4.44    | 0.46 | 0.56   | 0.52    | 0.72  | 1.28   | 0.65   | 0.77    | 0.92  | 5.2    | 0.8   | 0.86  | 1.08 | 0.95    | 0.43  | 1.61    | 0.89  | 0.74 | 0.8   | 0.8     | 0.35  | 0.71 |      |
| IM 1 18h 17.12.09 | 0.96  | 1.74    | 0.24    | 1.04 | 0.65   | 1.77    | 0.93  | 1.37   | 1.77   | 1.03    | 1.3   | 24.4   | 0.87  | 0.9   | 1.15 | 1.54    | 1.31  | 3.16    | 1.73  | 0.91 | 1.05  | 1.48    | 1.15  | 0.96 |      |
| IM 2 18h 17.12.09 | 0.74  | 1.17    | 0.05    | 0.39 | 0.25   | 1.33    | 0.79  | 1.01   | 1.28   | 0.59    | 1.11  | 0.09   | 0.65  | 0.87  | 1.07 | 1.22    | 0.72  | 1.78    | 0.98  | 0.92 | 0.64  | 0.98    | 0.39  | 0.87 |      |
| IM 3 18h 17.12.09 | 1.01  | 2.28    | 0.02    | 0.36 | 0.4    | 1.88    | 0.69  | 1.05   | 0.68   | 0.95    | 1.25  | 0.01   | 0.76  | 0.89  | 0.99 | 1.43    | 1.11  | 3.05    | 0.64  | 1.09 | 0.99  | 1.26    | 0.75  | 0.81 |      |
| IM 4 18h 26.11.09 | 0.82  | 0.89    | 0.33    | 2.35 | 0.4    | 0.98    | 1.01  | 1.03   | 1.28   | 0.64    | 1.18  | 0.19   | 0.9   | 1.17  | 1.89 | 1.2     | 0.55  | 2.3     | 2.49  | 1.1  | 1.65  | 0.73    | 0.26  | 1.19 |      |
| IM 5 18h 26.11.09 | 1     | 0.88    | 0.02    | 0.09 | 0.22   | 2.41    | 0.75  | 0.87   | 0.32   | 0.85    | 0.63  | 0.01   | 0.87  | 1.07  | 1.15 | 1.33    | 0.49  | 11.3    | 1.3   | 1.61 | 0.56  | 1.1     | 0.24  | 1    |      |
| IM 1 30h 08.01.10 | 0.92  | 1.28    | 9.07    | 1.03 | 0.82   | 1.25    | 1.04  | 0.82   | 0.8    | 0.73    | 1.25  | 3.86   | 1.15  | 1.17  | 1.13 | 0.96    | 1.46  | 1.36    | 0.9   | 1.14 | 0.62  | 1.02    | 1.34  | 1.05 |      |
| IM 2 30h 08.01.10 | 0.92  | 1.51    | 0.72    | 0.86 | 0.65   | 2.4     | 0.94  | 0.64   | 0.81   | 0.96    | 1.16  | 0.67   | 0.93  | 1.21  | 0.97 | 1.22    | 1.56  | 3.47    | 1     | 1.21 | 1.19  | 1.29    | 1.21  | 0.95 |      |
| IM 3 30h 08.01.10 | 0.64  | 1.51    | 0.14    | 0.98 | 0.55   | 1.92    | 0.76  | 0.46   | 1.82   | 0.78    | 1.01  | 0.35   | 0.63  | 0.98  | 0.83 | 1.58    | 1.57  | 0.57    | 1.12  | 0.79 | 0.62  | 1.03    | 0.93  | 0.94 |      |
| IM 3 30h 15.12.09 | 1.06  | 0.93    | 0.02    | 1.71 | 0.72   | 0.98    | 0.91  | 0.46   | 1.7    | 0.68    | 1.16  | 0.03   | 0.7   | 0.91  | 0.89 | 1.06    | 1.59  | 0.46    | 0.96  | 0.95 | 0.92  | 0.82    | 0.9   | 0.57 |      |
| IM 4 30h 15.12.09 | 1.17  | 1.21    | 3.28    | 0.6  | 0.17   | 1.9     | 0.93  | 0.59   | 0.72   | 0.91    | 1.26  | 0.03   | 1.32  | 1.17  | 1.01 | 1.51    | 1.5   | 1.36    | 0.96  | 1.07 | 0.65  | 1.18    | 1.31  | 1.04 |      |
| IM 1 2d 03.12.09  | 0.54  | 1.58    | 0.12    | 0.22 | 0.74   | 0.9     | 0.98  | 1.08   | 1.5    | 0.66    | 1.1   | 0.07   | 0.59  | 0.97  | 0.88 | 1.28    | 2.24  | 0.61    | 1.3   | 1.08 | 1.09  | 0.73    | 2.42  | 0.91 |      |
| IM 2 2d 03.12.09  | 0.47  | 1.33    | 0.09    | 3.05 | 0.41   | 1.47    | 1.14  | 0.54   | 1.44   | 0.45    | 0.92  | 0.07   | 0.64  | 1.09  | 1.89 | 1.52    | 1.93  | 0.41    | 2.04  | 1.24 | 1.42  | 0.5     | 1.91  | 1.1  |      |
| IM 3 2d 10.12.09  | 0.78  | 1.76    | 5.56    | 1.3  | 0.14   | 1.05    | 0.99  | 1.04   | 1.59   | 0.75    | 0.83  | 0.04   | 0.55  | 0.85  | 0.97 | 0.95    | 2.17  | 0.43    | 0.75  | 1.13 | 0.52  | 0.92    | 2     | 1.09 |      |
| IM 4 2d 10.12.09  | 0.74  | 1.43    | 0.44    | 0.45 | 0.4    | 2.17    | 0.83  | 0.44   | 0.97   | 1.58    | 0.88  | 0.34   | 0.96  | 0.88  | 1.05 | 1.73    | 1.13  | 2.82    | 0.59  | 0.89 | 0.74  | 1.27    | 0.99  | 1.2  |      |
| IM 5 2d 10.12.09  | 0.9   | 1.1     | 0.15    | 0.45 | 0.41   | 1.56    | 0.95  | 0.79   | 0.95   | 1.15    | 0.96  | 0.14   | 0.84  | 1.13  | 1.14 | 1.49    | 1.48  | 0.65    | 0.84  | 1.34 | 1.05  | 1.01    | 1.89  | 1.46 |      |
| IM 1 5d 21.04.10  | 0.6   | 1.44    | 0.04    | 0.61 | 0.27   | 0.8     | 0.81  | 0.51   | 0.64   | 0.59    | 0.97  | 0.03   | 0.89  | 0.91  | 0.8  | 0.79    | 1.66  | 0.86    | 1.04  | 0.94 | 0.49  | 0.56    | 1.61  | 0.96 |      |
| IM 2 5d 21.04.10  | 0.65  | 1.5     | 0.04    | 3.5  | 0.67   | 0.63    | 1.06  | 0.39   | 1.41   | 0.65    | 1.06  | 12.2   | 0.92  | 1.23  | 0.99 | 1.17    | 1.77  | 0.09    | 2.18  | 1.43 | 1.48  | 0.38    | 2.3   | 0.92 |      |
| IM 3 5d 21.04.10  | 0.51  | 0.86    | 0.44    | 1.59 | 0.21   | 0.38    | 0.78  | 0.5    | 0.62   | 0.43    | 0.95  | 0.39   | 0.71  | 0.85  | 0.68 | 0.62    | 1.42  | 0.1     | 1.03  | 0.9  | 0.58  | 0.39    | 1.47  | 0.83 |      |
| IM 4 5d 07.12.09  | 0.9   | 0.95    | 7.57    | 1.73 | 1.33   | 0.77    | 0.95  | 0.64   | 1.72   | 0.65    | 0.7   | 6.58   | 1     | 0.97  | 0.64 | 0.93    | 1.92  | 0.2     | 0.97  | 0.85 | 0.34  | 0.59    | 2.79  | 0.85 |      |
| IM 5 5d 21.04.10  | 1.27  | 1.09    | 0.46    | 1.53 | 52.5   | 2.09    | 1.51  | 0.74   | 2.2    | 1.68    | 1.01  | 659.5  | 1.41  | 1.57  | 1.14 | 1.27    | 1.62  | 1.7     | 1.82  | 1.9  | 3.49  | 0.64    | 2.41  | 1.04 |      |
| IM 4 5d 21.04.10  | n.m.  | n.m.    | n.m.    | n.m. | n.m.   | n.m.    | n.m.  | n.m.   | n.m.   | n.m.    | n.m.  | n.m.   | n.m.  | n.m.  | n.m. | n.m.    | n.m.  | n.m.    | n.m.  | n.m. | n.m.  | n.m.    | n.m.  | n.m. | n.m. |
| IM 1 14d 09.12.09 | 1.07  | 0.86    | 0.77    | 4.73 | 78.7   | 2.09    | 1.67  | 0.59   | 3.42   | 1.87    | 0.62  | 1257   | 1.19  | 1.15  | 1.07 | 1.1     | 2.14  | 0.42    | 1.08  | 1.32 | 2.83  | 0.83    | 4.8   | 1.34 |      |
| IM 2 14d 09.12.09 | 1.16  | 0.79    | 0.18    | 4.92 | 14.4   | 1.5     | 1.62  | 0.44   | 3.12   | 1.06    | 0.49  | 204.1  | 1.12  | 0.93  | 0.9  | 0.91    | 1.59  | 0.15    | 1.21  | 1.57 | 1.73  | 0.8     | 2.91  | 1.11 |      |
| IM 3 14d 09.12.09 | 0.91  | 0.9     | 7.38    | 2.84 | 0.99   | 1.13    | 0.93  | 0.48   | 1.56   | 1.06    | 0.6   | 5.95   | 0.79  | 0.77  | 0.77 | 1.11    | 1.76  | 0.14    | 0.71  | 1.27 | 1.18  | 0.9     | 2.96  | 1.05 |      |
| IM 1 14d 16.12.09 | 0.7   | 1.2     | 0.04    | 2.58 | 0.26   | 0.52    | 0.92  | 0.54   | 1.1    | 0.6     | 0.6   | 2.97   | 1.01  | 0.92  | 0.67 | 0.68    | 1.26  | 0.13    | 1.07  | 1.2  | 1.11  | 0.58    | 2.11  | 0.77 |      |
| IM 2 14d 16.12.09 | 0.51  | 0.8     | 1.76    | 2.94 | 0.23   | 0.28    | 0.73  | 0.57   | 0.66   | 0.4     | 0.77  | 0.01   | 0.65  | 0.79  | 0.6  | 0.61    | 1.72  | 0.05    | 0.93  | 1.04 | 1.05  | 0.37    | 1.97  | 0.56 |      |

| ID                | Socs3 | Vdr  | Nr2f2 | Rxra | Cyp7a1 | Ugt1a1 | Socs1 | Abcg2 | Abcc2 | Por  | Cyp2c37 | Nr1i2 | Cebpb | Nr0b2  | Cyp2b10 | Nr2f1 | Cyp2d22 | Actb | Hnf4a | Hk2  | Ptgs2 | Nr1i3 | Cyp2c29 |
|-------------------|-------|------|-------|------|--------|--------|-------|-------|-------|------|---------|-------|-------|--------|---------|-------|---------|------|-------|------|-------|-------|---------|
| IM 1 0h 17.12.09  | 0.56  | 0.38 | 0.9   | 0.9  | 1.02   | 1.13   | 0.61  | 0.93  | 0.71  | 0.57 | 2.35    | 0.57  | 0.61  | 0.15   | 0.99    | 0.55  | 1.17    | 0.64 | 0.9   | 0.24 | 0.34  | 0.72  | 2.11    |
| IM 2 0h 17.12.09  | 0.62  | 2.33 | 1.55  | 1.26 | 1.58   | 1.63   | 1.57  | 1.35  | 1.28  | 0.69 | 3.18    | 0.88  | 0.73  | 21.9   | 1.33    | 2.76  | 1.63    | 0.71 | 1.43  | 1.01 | 2.33  | 1.02  | 2.37    |
| IM 3 0h 06.01.10  | 0.29  | 0.23 | 1.42  | 0.98 | 2.02   | 1.23   | 0.33  | 1.03  | 0.99  | 0.89 | 1.58    | 0.76  | 0.7   | 0.34   | 0.59    | 0.71  | 1.04    | 0.75 | 1.03  | 0.46 | 0.18  | 0.77  | 1.62    |
| IM 4 0h 06.01.10  | 0.64  | 19.8 | 2.02  | 1.39 | 4.38   | 1.67   | 3.09  | 1.5   | 1.79  | 1.22 | 2.03    | 1.1   | 0.94  | 0.15   | 2.94    | 8.46  | 1.51    | 0.6  | 1.12  | 3.03 | 20.1  | 1.75  | 1.35    |
| IM 5 0h 06.01.10  | 0.56  | 0.16 | 0.83  | 1.03 | 4      | 0.93   | 0.65  | 0.95  | 0.95  | 1.22 | 0.93    | 0.65  | 0.78  | 0.11   | 0.76    | 0.38  | 0.8     | 0.59 | 0.74  | 0.41 | 0.06  | 0.82  | 1.06    |
| IM 2 6h 11.12.09  | 3.53  | 59.2 | 1.64  | 1.56 | 0.72   | 1.31   | 8.68  | 1.78  | 1.14  | 1.14 | 1.71    | 1.69  | 1.6   | 496.5  | 18.3    | 26.7  | 1.27    | 0.96 | 1.82  | 6.15 | 46.2  | 1.18  | 2       |
| IM 3 6h 11.12.09  | 4.39  | 71.8 | 1.37  | 1.43 | 0.55   | 1.35   | 13.1  | 1.74  | 0.95  | 0.86 | 2.18    | 1.51  | 1.62  | 655.5  | 19.1    | 29.5  | 1.27    | 1.06 | 1.56  | 6.99 | 58.5  | 1.03  | 1.96    |
| IM 4 6h 11.12.09  | 2.63  | 26.2 | 1.07  | 1.19 | 0.29   | 1.4    | 3.9   | 1.43  | 1.03  | 1.51 | 1.66    | 2.01  | 1.68  | 193.2  | 7.92    | 10.6  | 1.32    | 0.89 | 1.51  | 3.4  | 23.2  | 0.83  | 1.77    |
| IM 3 6h 01.12.09  | 1.25  | 0.43 | 0.69  | 1.02 | 0.51   | 0.94   | 1.08  | 0.87  | 0.6   | 0.8  | 1.74    | 0.65  | 0.78  | 228.5  | 2.2     | 0.5   | 0.97    | 0.75 | 0.97  | 0.35 | 0.6   | 0.56  | 2.15    |
| IM 4 6h 01.12.09  | 0.97  | 0.05 | 1.02  | 1.12 | 0.85   | 1.22   | 0.94  | 1.05  | 0.88  | 0.95 | 2.24    | 0.86  | 0.61  | 451.4  | 0.91    | 0.62  | 1.18    | 0.64 | 1.15  | 0.27 | 0.18  | 0.66  | 2.31    |
| IM 1 12h 08.12.09 | 1.14  | 0.59 | 1.1   | 0.97 | 0.67   | 1.11   | 0.64  | 0.78  | 0.88  | 1.3  | 1.23    | 1.29  | 0.87  | 1.15   | 1.81    | 0.34  | 0.86    | 0.88 | 1.04  | 0.59 | 0.6   | 0.92  | 1.63    |
| IM 2 12h 08.12.09 | 0.68  | 0.49 | 1.09  | 0.91 | 1.8    | 1.08   | 0.6   | 0.89  | 1.05  | 1.12 | 1.2     | 1.02  | 0.71  | 1.32   | 0.65    | 0.49  | 0.9     | 0.64 | 0.87  | 0.54 | 0.45  | 1.05  | 1.46    |
| IM 1 12h 11.12.09 | 0.99  | 0.24 | 0.72  | 0.98 | 1.03   | 0.78   | 0.52  | 0.7   | 0.68  | 1.14 | 1.21    | 1.07  | 0.84  | 0.43   | 4.08    | 0.28  | 0.72    | 1.08 | 0.7   | 0.29 | 0.07  | 1.21  | 1.29    |
| IM 1 12h 14.12.09 | 0.77  | 0.41 | 1     | 1.09 | 0.79   | 1.09   | 0.66  | 0.68  | 0.87  | 1.39 | 1.31    | 1.43  | 1.05  | 1.41   | 1.32    | 0.57  | 0.76    | 0.74 | 1.33  | 0.46 | 0.28  | 1.46  | 1.34    |
| IM 2 12h 14.12.09 | 1.4   | 0.6  | 0.65  | 0.99 | 0.24   | 0.78   | 1.54  | 0.65  | 0.51  | 0.65 | 1.03    | 0.93  | 0.95  | 1.05   | 2.37    | 0.58  | 0.68    | 0.96 | 0.86  | 0.38 | 0.2   | 0.77  | 1.37    |
| IM 1 18h 17.12.09 | 1.09  | 0.52 | 0.98  | 0.9  | 0.6    | 1.32   | 0.56  | 0.97  | 1.18  | 1.44 | 1.85    | 1.28  | 1.24  | 0.66   | 0.82    | 0.55  | 1.02    | 1.12 | 1.13  | 0.64 | 2.37  | 1.43  | 2.03    |
| IM 2 18h 17.12.09 | 1.3   | 1.13 | 0.84  | 0.86 | 0.49   | 1.13   | 0.53  | 0.76  | 0.66  | 1.01 | 1.21    | 1.06  | 1.01  | 0.16   | 0.4     | 0.26  | 0.81    | 1.17 | 0.96  | 0.4  | 0.39  | 1.26  | 0.97    |
| IM 3 18h 17.12.09 | 0.73  | 0.41 | 0.7   | 0.93 | 0.95   | 1.12   | 0.65  | 0.89  | 0.89  | 1.05 | 1.28    | 0.89  | 0.99  | 0.46   | 1.51    | 0.3   | 1.07    | 1.02 | 1.05  | 0.35 | 0.44  | 1.44  | 1.38    |
| IM 4 18h 26.11.09 | 2.57  | 0.72 | 0.69  | 1.19 | 0.21   | 0.92   | 1.71  | 0.81  | 0.91  | 0.96 | 1.4     | 0.98  | 1.63  | 0.85   | 0.36    | 0.4   | 0.85    | 1.27 | 1.25  | 0.69 | 0.79  | 1.17  | 0.99    |
| IM 5 18h 26.11.09 | 1.97  | 0.12 | 0.68  | 1.26 | 1.89   | 1.05   | 0.35  | 0.9   | 0.86  | 0.68 | 2.11    | 0.6   | 0.95  | 0      | 0.38    | 0.25  | 0.89    | 0.98 | 0.99  | 0.34 | 0.04  | 1.8   | 0.84    |
| IM 1 30h 08.01.10 | 1.69  | 0.65 | 0.81  | 1.07 | 1.27   | 1.14   | 0.63  | 1.35  | 1.27  | 0.92 | 1.51    | 1.06  | 1     | 1.74   | 0.24    | 0.57  | 0.94    | 1.06 | 1.3   | 0.84 | 0.71  | 1.42  | 1.2     |
| IM 2 30h 08.01.10 | 1     | 0.92 | 0.79  | 1.09 | 2.55   | 1.27   | 0.75  | 1.07  | 1.28  | 1.15 | 1.14    | 1.11  | 1.12  | 0.27   | 0.96    | 0.66  | 1.1     | 0.96 | 1.12  | 1.06 | 2.11  | 1.88  | 0.56    |
| IM 3 30h 08.01.10 | 1.2   | 0.96 | 0.86  | 0.93 | 0.08   | 1.23   | 0.43  | 0.77  | 0.92  | 1.49 | 1.01    | 1.48  | 1.18  | 0.77   | 0.89    | 0.56  | 1.03    | 0.83 | 1.16  | 0.61 | 1.01  | 1.13  | 0.63    |
| IM 3 30h 15.12.09 | 1.25  | 0.3  | 1.06  | 0.93 | 0.22   | 1.01   | 0.47  | 0.78  | 1.25  | 1.25 | 0.88    | 1.17  | 1.27  | 0.44   | 0.4     | 0.66  | 0.75    | 1.24 | 0.91  | 0.79 | 0.59  | 1.36  | 0.66    |
| IM 4 30h 15.12.09 | 1.44  | 1.01 | 1.13  | 1.25 | 1.47   | 1.13   | 0.81  | 0.91  | 1.28  | 1.19 | 1.53    | 1.02  | 1.39  | 0.0005 | 0.46    | 0.29  | 1.24    | 0.97 | 1.26  | 0.94 | 0.16  | 2.01  | 0.94    |
| IM 1 2d 03.12.09  | 1.76  | 0.2  | 0.97  | 0.91 | 0.32   | 0.9    | 0.55  | 1.02  | 1.14  | 0.87 | 0.86    | 1.14  | 1.13  | 1.22   | 0.38    | 0.56  | 0.84    | 1.2  | 0.97  | 0.91 | 0.38  | 0.83  | 1.5     |
| IM 2 2d 03.12.09  | 2.46  | 0.66 | 0.75  | 0.95 | 0.03   | 1.17   | 2.3   | 0.95  | 0.91  | 0.8  | 1.12    | 1.1   | 1.4   | 0.58   | 0.25    | 0.79  | 0.75    | 1.81 | 1.19  | 1.44 | 1.12  | 0.74  | 0.87    |
| IM 3 2d 10.12.09  | 0.27  | 0.94 | 0.78  | 0.65 | 1.89   | 1.24   | 0.32  | 1.28  | 1.04  | 0.76 | 1.14    | 0.87  | 0.79  | 0.94   | 0.62    | 0.73  | 0.96    | 1.36 | 0.82  | 1.26 | 0.68  | 1.01  | 1.53    |
| IM 4 2d 10.12.09  | 0.63  | 0.38 | 0.82  | 0.87 | 1.27   | 1.2    | 0.37  | 1.03  | 0.95  | 1.73 | 1.05    | 1.21  | 0.72  | 0.55   | 6.55    | 0.49  | 1.32    | 0.59 | 1.02  | 0.31 | 0.12  | 1.52  | 0.6     |
| IM 5 2d 10.12.09  | 1.08  | 0.33 | 0.75  | 1    | 1.51   | 1.13   | 0.34  | 1.31  | 1.08  | 1.18 | 0.97    | 1.1   | 1.15  | 0.31   | 0.86    | 0.67  | 1.15    | 0.91 | 1.09  | 0.69 | 0.1   | 1.67  | 0.95    |
| IM 1 5d 21.04.10  | 0.3   | 0.47 | 0.84  | 0.88 | 2.12   | 0.58   | 0.4   | 0.95  | 0.8   | 0.74 | 0.53    | 0.82  | 0.85  | 0.11   | 0.41    | 0.79  | 0.84    | 0.92 | 0.8   | 1.3  | 6.58  | 0.75  | 0.73    |
| IM 2 5d 21.04.10  | 1.69  | 1.06 | 1.21  | 0.83 | 0.64   | 0.53   | 0.96  | 0.97  | 0.96  | 0.65 | 0.22    | 1.07  | 1.44  | 0.25   | 0.24    | 1.58  | 0.91    | 2.44 | 0.88  | 2.39 | 2.13  | 0.49  | 0.6     |
| IM 3 5d 21.04.10  | 0.39  | 0.81 | 0.81  | 0.66 | 1.16   | 0.39   | 0.4   | 0.93  | 0.88  | 0.44 | 0.24    | 0.75  | 0.86  | 0.13   | 0.12    | 0.97  | 0.83    | 1.13 | 0.55  | 1.69 | 1.05  | 0.5   | 0.36    |
| IM 4 5d 07.12.09  | 0.55  | 1.22 | 1.12  | 0.78 | 3.49   | 0.58   | 0.51  | 0.8   | 1.07  | 0.95 | 0.32    | 0.88  | 0.63  | 0.95   | 1.27    | 1.39  | 1       | 0.98 | 0.62  | 1.35 | 0.74  | 0.72  | 0.44    |
| IM 5 5d 21.04.10  | 1.45  | 8.8  | 1.62  | 1.41 | 1.82   | 0.7    | 4.29  | 1.39  | 1.37  | 1.11 | 0.72    | 1.37  | 1.73  | 76.2   | 3.2     | 5.51  | 1.28    | 1.42 | 1.29  | 3.64 | 16.4  | 1.26  | 0.5     |
| IM 4 5d 21.04.10  | n.m.  | n.m. | n.m.  | n.m. | n.m.   | n.m.   | n.m.  | n.m.  | n.m.  | n.m. | n.m.    | n.m.  | n.m.  | n.m.   | n.m.    | n.m.  | n.m.    | n.m. | n.m.  | n.m. | n.m.  | n.m.  | n.m.    |
| IM 1 14d 09.12.09 | 1.2   | 15.1 | 1.55  | 1.25 | 4.32   | 1.31   | 3.93  | 1.28  | 1.51  | 1.71 | 0.7     | 0.98  | 0.94  | 130.6  | 2.6     | 8.19  | 1.41    | 1.22 | 1.03  | 4.72 | 15.5  | 1.35  | 0.41    |
| IM 2 14d 09.12.09 | 1.15  | 6.04 | 1.61  | 1.1  | 3.6    | 1.02   | 3.12  | 1.07  | 1.41  | 1.51 | 0.53    | 0.93  | 1.17  | 21.4   | 0.63    | 4.42  | 1.07    | 1.67 | 0.9   | 5.18 | 8.36  | 0.89  | 0.45    |
| IM 3 14d 09.12.09 | 0.75  | 0.68 | 1.06  | 0.84 | 5.42   | 0.96   | 0.88  | 0.85  | 1.39  | 1.67 | 0.39    | 0.93  | 0.92  | 0.71   | 0.47    | 1.31  | 1.1     | 0.85 | 0.77  | 1.8  | 1.59  | 1.01  | 0.44    |
| IM 1 14d 16.12.09 | 0.69  | 1.24 | 1.31  | 0.87 | 3.29   | 0.69   | 2.61  | 0.93  | 0.98  | 0.88 | 0.26    | 0.85  | 1.02  | 0.004  | 0.53    | 1.11  | 0.94    | 1.82 | 0.75  | 2.94 | 1.62  | 0.51  | 0.64    |
| IM 2 14d 16.12.09 | 0.41  | 2    | 0.95  | 0.62 | 1.85   | 0.51   | 3.95  | 0.96  | 0.96  | 0.53 | 0.13    | 0.56  | 0.75  | 0.17   | 0.4     | 0.82  | 0.77    | 1.49 | 0.54  | 3.27 | 2     | 0.34  | 0.36    |

### 3 RNA Fibrosis genes

| ID                | Pparg | Edn1 | Birc5 | Sparc | Col1a1 | Col8a1 | Igf1 | Fasl | Bad  | Tgfb2 | Rarres1 | Lama1 | Timp1 | Nes  | Bcl2l11 | Pdgfb | Xiap | Notch3 | Cdh1 | Timp2 | Wisp1 | Bak1 | Gdf2  | Pde4a |      |
|-------------------|-------|------|-------|-------|--------|--------|------|------|------|-------|---------|-------|-------|------|---------|-------|------|--------|------|-------|-------|------|-------|-------|------|
| IM 1 0h 17.12.09  | 1.59  | 0.52 | 0.63  | 0.77  | 0.48   | 2.1    | 1.14 | 1.07 | 0.7  | 0.79  | 1.26    | 1.83  | 0.06  | 1.28 | 0.93    | 0.63  | 1.13 | 1.35   | 0.69 | 1.01  | 2.26  | 0.63 | 1.51  | 0.87  |      |
| IM 2 0h 17.12.09  | 0.59  | 0.79 | 0.47  | 0.68  | 0.18   | 1.1    | 1.07 | 0.18 | 0.65 | 0.63  | 1.21    | 1.82  | 0.07  | 1.55 | 0.73    | 0.44  | 1.03 | 1.11   | 0.76 | 0.9   | 1.74  | 0.65 | 1.84  | 1.11  |      |
| IM 3 0h 06.01.10  | 0.79  | 0.24 | 0.7   | 0.81  | 0.19   | 1.11   | 0.96 | 1.88 | 0.76 | 0.66  | 1.46    | 1.83  | 0.09  | 1.18 | 0.67    | 0.42  | 1.33 | 1.24   | 0.81 | 0.8   | 1.81  | 0.81 | 1.7   | 0.95  |      |
| IM 4 0h 06.01.10  | 0.75  | 0.6  | 0.58  | 0.91  | 0.65   | 1.33   | 1.08 | 1.89 | 0.67 | 0.95  | 1.08    | 1.74  | 0.08  | 1.34 | 0.69    | 0.46  | 0.88 | 1.74   | 0.63 | 1.06  | 1.73  | 0.73 | 1.77  | 0.92  |      |
| IM 5 0h 06.01.10  | 0.64  | 0.38 | 0.65  | 0.68  | 0.54   | 1.16   | 0.83 | 0.45 | 0.72 | 0.74  | 1.32    | 1.54  | 0.11  | 0.88 | 0.54    | 0.37  | 0.92 | 1.02   | 0.66 | 1.1   | 1.04  | 0.66 | 2.05  | 1.37  |      |
| IM 2 6h 11.12.09  | 0.62  | 0.92 | 0.92  | 0.95  | 0.36   | 0.53   | 0.88 | 0.93 | 0.59 | 0.66  | 2       | 2.16  | 0.36  | 0.42 | 0.61    | 0.6   | 0.76 | 0.87   | 0.57 | 0.92  | 1.4   | 0.73 | 2     | 0.65  |      |
| IM 3 6h 11.12.09  | 0.53  | 0.82 | 0.23  | 0.75  | 0.18   | 0.57   | 0.94 | 0.58 | 0.62 | 0.69  | 1.57    | 1.16  | 0.26  | 0.35 | 0.77    | 0.58  | 0.76 | 0.74   | 0.44 | 0.57  | 1.03  | 0.69 | 1.77  | 0.32  |      |
| IM 4 6h 11.12.09  | 0.61  | 0.76 | 0.46  | 0.72  | 0.32   | 0.37   | 1.02 | 1.43 | 0.8  | 0.82  | 2.61    | 1     | 0.34  | 0.27 | 0.65    | 0.51  | 0.66 | 0.61   | 0.57 | 0.66  | 1.17  | 0.74 | 1.35  | 0.42  |      |
| IM 3 6h 01.12.09  | 0.7   | 0.93 | 0.59  | 0.68  | 0.24   | 0.57   | 0.82 | 2.41 | 0.86 | 0.72  | 1.55    | 1.03  | 0.42  | 0.71 | 1.16    | 0.67  | 0.95 | 0.74   | 0.72 | 0.73  | 1.84  | 0.9  | 1.05  | 0.75  |      |
| IM 4 6h 01.12.09  | 0.49  | 0.73 | 0.28  | 0.59  | 0.25   | 0.41   | 1.17 | 0.45 | 0.57 | 0.64  | 1.26    | 0.75  | 0.13  | 0.39 | 0.72    | 0.55  | 0.89 | 0.63   | 0.3  | 0.6   | 0.34  | 0.64 | 1.22  | 0.43  |      |
| IM 1 12h 08.12.09 | 0.89  | 0.5  | 0.46  | 0.5   | 0.22   | 0.29   | 0.87 | 1.36 | 1.48 | 0.96  | 0.79    | 0.55  | 1.06  | 0.27 | 1.42    | 0.73  | 1    | 0.38   | 1.05 | 0.67  | 0.73  | 0.87 | 1.14  | 0.98  |      |
| IM 2 12h 08.12.09 | 0.84  | 0.96 | 0.38  | 0.62  | 0.42   | 0.71   | 0.87 | 1.03 | 1.26 | 0.78  | 0.84    | 0.82  | 0.54  | 0.7  | 1.24    | 0.72  | 0.91 | 0.52   | 0.83 | 0.74  | 1.06  | 0.75 | 1.31  | 0.9   |      |
| IM 1 12h 11.12.09 | 0.92  | 0.36 | 0.33  | 0.26  | 0.07   | 0.11   | 0.83 | 0.9  | 1.04 | 0.79  | 0.73    | 0.15  | 0.47  | 0.35 | 0.94    | 0.51  | 1.02 | 0.23   | 0.79 | 0.3   | 0.17  | 0.89 | 0.48  | 0.56  |      |
| IM 1 12h 14.12.09 | 1.31  | 0.78 | 0.54  | 0.47  | 0.17   | 0.4    | 1.15 | 2.14 | 1.56 | 0.9   | 1.79    | 0.64  | 0.47  | 0.65 | 1.8     | 0.88  | 0.99 | 0.61   | 0.81 | 0.55  | 1.04  | 1.08 | 0.57  | 0.75  |      |
| IM 2 12h 14.12.09 | 1.04  | 0.64 | 0.32  | 0.51  | 0.15   | 0.76   | 1.05 | 0.75 | 1.43 | 0.77  | 2.59    | 0.48  | 0.92  | 0.83 | 1.45    | 0.76  | 1.11 | 0.59   | 0.99 | 0.46  | 1.38  | 0.93 | 0.72  | 0.76  |      |
| IM 1 18h 17.12.09 | 1.32  | 2.03 | 0.48  | 0.86  | 1.11   | 1.3    | 1.15 | 1.5  | 1.54 | 1.19  | 1.37    | 0.44  | 1.75  | 1.73 | 1.92    | 1.6   | 1.14 | 1.26   | 1.54 | 0.95  | 1.51  | 1.15 | 0.52  | 0.95  |      |
| IM 2 18h 17.12.09 | 0.96  | 0.68 | 0.22  | 0.26  | 0.18   | 0.12   | 1.05 | 0.38 | 1.29 | 0.6   | 0.89    | 0.18  | 0.66  | 0.29 | 0.7     | 0.53  | 0.99 | 0.17   | 1.07 | 0.33  | 0.43  | 0.63 | 0.33  | 0.68  |      |
| IM 3 18h 17.12.09 | 0.79  | 0.73 | 0.29  | 0.24  | 0.17   | 0.02   | 1.06 | 0.16 | 0.88 | 0.59  | 1.24    | 0.18  | 0.72  | 0.49 | 0.96    | 0.41  | 1.08 | 0.18   | 0.87 | 0.37  | 0.19  | 0.78 | 0.29  | 0.7   |      |
| IM 4 18h 26.11.09 | 0.68  | 0.87 | 0.11  | 0.33  | 0.11   | 0.21   | 1.28 | 1.16 | 1.16 | 0.77  | 1.06    | 0.24  | 0.47  | 0.3  | 1.56    | 0.75  | 1.19 | 0.17   | 0.83 | 0.34  | 0.56  | 0.94 | 0.43  | 0.82  |      |
| IM 5 18h 26.11.09 | 1.18  | 0.31 | 0.14  | 0.24  | 0.11   | 0.14   | 1.16 | 0.41 | 1.1  | 0.44  | 1.25    | 0.31  | 0.24  | 0.18 | 0.88    | 0.47  | 1.18 | 0.17   | 0.51 | 0.34  | 0.06  | 0.71 | 0.39  | 0.73  |      |
| IM 1 30h 08.01.10 | 1.3   | 0.42 | 0.93  | 0.49  | 0.68   | 0.12   | 1.19 | 0.19 | 0.95 | 0.65  | 0.88    | 0.24  | 1.05  | 0.84 | 0.78    | 0.73  | 1.05 | 0.29   | 0.94 | 0.56  | 0.68  | 0.77 | 0.38  | 0.64  |      |
| IM 2 30h 08.01.10 | 1.54  | 1.24 | 1.88  | 0.8   | 1.38   | 1      | 1.02 | 4.34 | 1.48 | 1.02  | 1.13    | 0.8   | 2.03  | 1.34 | 1.26    | 1.28  | 1.15 | 1.14   | 1.59 | 1.16  | 2.29  | 1.2  | 0.94  | 1.44  |      |
| IM 3 30h 08.01.10 | 0.87  | 0.82 | 1.17  | 0.85  | 1.06   | 1.39   | 1.14 | 1.17 | 1.34 | 0.98  | 0.88    | 0.64  | 1.64  | 0.56 | 0.79    | 0.66  | 0.9  | 0.9    | 1.5  | 0.76  | 0.78  | 1.07 | 1.25  | 1     |      |
| IM 3 30h 15.12.09 | 0.98  | 1.25 | 1.01  | 1.58  | 2.84   | 2.47   | 0.81 | 1.76 | 1.47 | 1.43  | 0.71    | 1.82  | 3.51  | 2.14 | 1.44    | 1.36  | 1.2  | 2.4    | 1.92 | 1.03  | 1.34  | 1.21 | 1.62  | 0.98  |      |
| IM 4 30h 15.12.09 | 0.86  | 0.38 | 0.65  | 0.33  | 0.66   | 0.09   | 1.12 | 0.52 | 1    | 0.74  | 0.52    | 0.32  | 1.24  | 0.17 | 0.8     | 0.66  | 1.09 | 0.51   | 0.84 | 0.4   | 0.19  | 1.13 | 0.58  | 1.56  |      |
| IM 1 2d 03.12.09  | 0.89  | 1.11 | 4.59  | 1.67  | 2.93   | 0.94   | 1.1  | 1.12 | 0.77 | 1.1   | 0.48    | 2.66  | 1.62  | 1.89 | 0.6     | 1.3   | 0.98 | 1.35   | 1.35 | 1.07  | 1.48  | 1.25 | 1.81  | 1.48  |      |
| IM 2 2d 03.12.09  | 1.18  | 1.56 | 2.77  | 1.59  | 5.1    | 1.91   | 1.21 | 0.95 | 1.05 | 1.18  | 0.34    | 1.06  | 4.22  | 1.91 | 0.85    | 1.61  | 1.2  | 1.23   | 1.35 | 1.12  | 1.78  | 1.34 | 0.63  | 1.23  |      |
| IM 3 2d 10.12.09  | 1.3   | 2.03 | 4.74  | 1.73  | 3.32   | 3.66   | 1.14 | 0.08 | 1.18 | 1.24  | 0.79    | 1.36  | 4.85  | 3.85 | 0.17    | 1.35  | 1.15 | 0.68   | 2.64 | 2.49  | 0.001 | 1.26 | 0.001 | 0.31  |      |
| IM 4 2d 10.12.09  | 0.78  | 0.71 | 0.44  | 0.44  | 1.24   | 0.34   | 0.95 | 0.48 | 0.92 | 0.78  | 0.97    | 0.23  | 0.73  | 0.47 | 0.63    | 0.54  | 0.88 | 0.31   | 0.82 | 0.49  | 0.17  | 0.75 | 0.38  | 0.61  |      |
| IM 5 2d 10.12.09  | 1.52  | 0.9  | 1.99  | 1.05  | 2.54   | 0.58   | 1.53 | 1.13 | 1.5  | 0.95  | 0.57    | 0.85  | 0.93  | 1.04 | 0.66    | 0.96  | 1.21 | 0.55   | 1.7  | 0.8   | 0.73  | 1.17 | 0.87  | 1.38  |      |
| IM 1 5d 21.04.10  | 1.17  | 1.7  | 5.37  | 2.58  | 5.67   | 3.94   | 0.86 | 0.57 | 0.9  | 1.22  | 0.95    | 1.63  | 5.7   | 1.71 | 1.39    | 1.87  | 0.91 | 2.4    | 0.9  | 1.94  | 2.44  | 1.05 | 2.96  | 1.48  |      |
| IM 2 5d 21.04.10  | 1.28  | 4.16 | 14.4  | 6.03  | 19.1   | 12.5   | 1.1  | 2.81 | 1.66 | 2.22  | 0.76    | 5.45  | 11.3  | 6.01 | 1.72    | 4.85  | 1.78 | 8.79   | 2.72 | 4     | 7.78  | 1.92 | 3.2   | 3.52  |      |
| IM 3 5d 21.04.10  | 0.84  | 2.1  | 3.91  | 3.13  | 6.89   | 6.15   | 0.85 | 1.08 | 0.77 | 1.59  | 0.77    | 3.24  | 5.38  | 4.14 | 1.05    | 2.37  | 0.98 | 3.44   | 1.27 | 2.05  | 3.65  | 1.25 | 2.48  | 2.03  |      |
| IM 4 5d 07.12.09  | 0.94  | 1.28 | 4.63  | 2.72  | 7.12   | 2.97   | 1.01 | 0.84 | 0.78 | 1.53  | 0.59    | 2.06  | 2.32  | 2.81 | 1.04    | 1.9   | 0.83 | 2.31   | 1.18 | 1.96  | 2.75  | 1.17 | 2.01  | 1.59  |      |
| IM 5 5d 21.04.10  | 1.2   | 2.55 | 6.67  | 3.1   | 7.86   | 4.75   | 0.94 | 1.03 | 1.11 | 1.34  | 1.06    | 3.78  | 3.69  | 1.52 | 1.32    | 2.08  | 1.22 | 3.01   | 1.13 | 2.49  | 2.28  | 1.37 | 3.67  | 1.67  |      |
| IM 4 5d 21.04.10  | n.m.  | n.m. | n.m.  | n.m.  | n.m.   | n.m.   | n.m. | n.m. | n.m. | n.m.  | n.m.    | n.m.  | n.m.  | n.m. | n.m.    | n.m.  | n.m. | n.m.   | n.m. | n.m.  | n.m.  | n.m. | n.m.  | n.m.  | n.m. |
| IM 1 14d 09.12.09 | 1.38  | 2.34 | 0.84  | 3.24  | 9.91   | 6.71   | 0.94 | 1.3  | 1    | 1.97  | 0.86    | 1.58  | 4.49  | 1.54 | 1.98    | 2.02  | 0.69 | 3.22   | 0.99 | 3.83  | 3.17  | 1.11 | 2.39  | 1.13  |      |
| IM 2 14d 09.12.09 | 2.18  | 3.51 | 3.3   | 6.8   | 6.66   | 14.4   | 0.79 | 5.86 | 1.12 | 2.91  | 0.92    | 3.23  | 11.7  | 4.32 | 2.89    | 5.13  | 0.9  | 7.47   | 1.53 | 6.34  | 8.86  | 1.64 | 3.56  | 2.04  |      |
| IM 3 14d 09.12.09 | 1.46  | 3.01 | 1.13  | 2.41  | 9.22   | 4.31   | 1.05 | 1.12 | 0.83 | 1.75  | 0.8     | 1.34  | 3.41  | 2.16 | 1.17    | 2.66  | 0.69 | 2.86   | 0.93 | 2.61  | 2.58  | 1.12 | 2.63  | 1.29  |      |
| IM 1 14d 16.12.09 | 2.35  | 3.53 | 9.25  | 6.58  | 21.6   | 18.2   | 0.79 | 9.42 | 1.38 | 2.46  | 1.04    | 5.2   | 10.5  | 4.11 | 2.54    | 5.01  | 1.07 | 7.2    | 2.03 | 4.72  | 7.59  | 2.39 | 3.9   | 2.67  |      |
| IM 2 14d 16.12.09 | 1.55  | 2.39 | 9.07  | 4.36  | 14     | 8.21   | 0.62 | 9.9  | 0.94 | 2.3   | 0.85    | 3.3   | 8.92  | 4.07 | 1.52    | 3.62  | 0.92 | 5.02   | 1.87 | 2.69  | 6.09  | 2.54 | 2.52  | 2.81  |      |

| ID                | Ctgf | Notch1 | Tnc  | Bax  | Cdh2 | Pde4b | Fn1  | Smad7 | Mki67 | Prom1 | Ch25h | Pde4d | Acta2  | Pten | Tgfb2 | Mmp10 | Col4a3 | Actb | Col3a1 | Cyp2e1 | Rps18 | Smad6 | Col6a6 |
|-------------------|------|--------|------|------|------|-------|------|-------|-------|-------|-------|-------|--------|------|-------|-------|--------|------|--------|--------|-------|-------|--------|
| IM 1 0h 17.12.09  | 0.59 | 0.94   | 0.96 | 0.65 | 1.13 | 1.44  | 0.6  | 1.76  | 0.48  | 3.33  | 0.31  | 1.1   | 1.96   | 1.07 | 0.4   | 0.002 | 1.75   | 0.69 | 0.86   | 1.9    | 0.88  | 1.13  | 1.02   |
| IM 2 0h 17.12.09  | 0.45 | 0.99   | 0.5  | 0.56 | 1.15 | 1.07  | 0.66 | 1.06  | 0.43  | 0.37  | 0.42  | 0.48  | 1.84   | 1.03 | 0.45  | 0.001 | 2.05   | 0.61 | 0.48   | 1.93   | 0.75  | 1.15  | 0.34   |
| IM 3 0h 06.01.10  | 0.58 | 0.85   | 0.29 | 0.74 | 1    | 0.66  | 0.69 | 0.9   | 0.44  | 0.33  | 0.09  | 1.01  | 0.18   | 0.98 | 0.29  | 0.002 | 1.11   | 0.89 | 0.5    | 1.79   | 1.03  | 0.9   | 0.17   |
| IM 4 0h 06.01.10  | 0.82 | 0.76   | 0.74 | 0.56 | 0.9  | 0.54  | 0.59 | 1.06  | 0.38  | 0.68  | 0.13  | 0.49  | 1.11   | 0.84 | 0.6   | 0.001 | 1.86   | 0.48 | 1.03   | 1.67   | 0.69  | 0.7   | 1.3    |
| IM 5 0h 06.01.10  | 0.62 | 0.7    | 0.66 | 0.56 | 0.96 | 0.77  | 0.66 | 0.78  | 0.61  | 0.36  | 0.87  | 0.57  | 2.78   | 0.87 | 0.4   | 0.001 | 1.57   | 0.53 | 0.89   | 1.22   | 0.76  | 0.67  | 0.37   |
| IM 2 6h 11.12.09  | 1.7  | 0.96   | 0.4  | 0.65 | 0.76 | 0.3   | 1.21 | 1.27  | 0.96  | 0.23  | 0.95  | 1.52  | 2.52   | 0.77 | 0.55  | 0.01  | 1.76   | 0.75 | 0.51   | 1.2    | 0.84  | 1.02  | 0.48   |
| IM 3 6h 11.12.09  | 1.34 | 0.57   | 0.22 | 0.58 | 0.51 | 0.48  | 0.91 | 1.04  | 0.23  | 0.16  | 0.85  | 0.86  | 0.65   | 0.63 | 0.59  | 0.002 | 0.19   | 0.78 | 0.29   | 1.08   | 0.79  | 0.77  | 0.58   |
| IM 4 6h 11.12.09  | 1.56 | 0.61   | 0.41 | 0.51 | 0.59 | 0.67  | 0.97 | 1.91  | 0.44  | 0.18  | 0.75  | 0.65  | 1.05   | 0.7  | 0.51  | 0.01  | 0.99   | 0.66 | 0.37   | 1.23   | 0.79  | 0.72  | 0.77   |
| IM 3 6h 01.12.09  | 1.28 | 0.92   | 0.59 | 0.66 | 0.69 | 0.64  | 1.16 | 1.44  | 0.47  | 0.89  | 2.04  | 1.01  | 3.07   | 0.82 | 1.05  | 0.17  | 1.77   | 0.91 | 0.23   | 1.24   | 0.73  | 0.83  | 1.17   |
| IM 4 6h 01.12.09  | 1.03 | 0.68   | 0.14 | 0.55 | 0.65 | 0.52  | 1.01 | 0.9   | 0.34  | 0.1   | 0.47  | 0.94  | 0.39   | 0.8  | 0.37  | 0.09  | 1.4    | 0.74 | 0.32   | 1.97   | 0.81  | 0.84  | 0.35   |
| IM 1 12h 08.12.09 | 0.67 | 0.79   | 0.37 | 1.16 | 0.84 | 1.45  | 1.47 | 1.31  | 0.28  | 0.94  | 0.67  | 1.08  | 0.72   | 1.04 | 0.87  | 0.004 | 0.98   | 0.92 | 0.22   | 1.12   | 1.05  | 1.02  | 0.72   |
| IM 2 12h 08.12.09 | 0.71 | 0.7    | 0.73 | 0.88 | 0.76 | 1.19  | 1.13 | 0.83  | 0.29  | 0.49  | 1.35  | 0.79  | 0.79   | 0.93 | 0.95  | 0.01  | 1.07   | 0.76 | 0.41   | 1.43   | 1.03  | 0.65  | 0.81   |
| IM 1 12h 11.12.09 | 0.34 | 0.55   | 0.07 | 0.88 | 0.65 | 0.54  | 1.33 | 1.2   | 0.16  | 0.27  | 0.56  | 1.13  | 0.27   | 0.83 | 0.5   | 0.05  | 0.19   | 1.18 | 0.05   | 0.72   | 0.89  | 0.64  | 0.98   |
| IM 1 12h 14.12.09 | 0.69 | 0.8    | 0.22 | 0.94 | 0.89 | 1.34  | 1.37 | 1.3   | 0.37  | 0.51  | 0.96  | 0.91  | 1.02   | 1.06 | 0.95  | 0.01  | 0.63   | 0.75 | 0.16   | 1.39   | 0.99  | 0.7   | 1.09   |
| IM 2 12h 14.12.09 | 0.61 | 0.75   | 0.26 | 1.13 | 0.7  | 0.67  | 1.67 | 1.32  | 0.27  | 0.43  | 0.49  | 0.93  | 0.23   | 0.88 | 0.81  | 0.05  | 1.64   | 1.13 | 0.15   | 0.81   | 0.96  | 0.79  | 1.58   |
| IM 1 18h 17.12.09 | 1.07 | 1.22   | 1.09 | 1.36 | 1.38 | 1.99  | 1.43 | 1.9   | 0.75  | 2.02  | 3     | 1.31  | 2.42   | 1.3  | 0.76  | 382.2 | 0.0002 | 1.38 | 1.13   | 1.81   | 1.57  | 1.32  | 0.97   |
| IM 2 18h 17.12.09 | 0.42 | 0.72   | 0.19 | 1.01 | 1.04 | 0.68  | 1.51 | 0.96  | 0.15  | 0.34  | 0.54  | 0.63  | 0.92   | 0.95 | 0.39  | 72    | 0.63   | 1.23 | 0.12   | 1.29   | 1.29  | 0.54  | 0.63   |
| IM 3 18h 17.12.09 | 0.33 | 0.69   | 0.28 | 0.86 | 1.03 | 0.44  | 1.21 | 0.95  | 0.15  | 0.19  | 1.28  | 1.21  | 2.16   | 1.07 | 0.37  | 363.5 | 0.34   | 1.09 | 0.12   | 1.24   | 0.93  | 0.65  | 0.18   |
| IM 4 18h 26.11.09 | 0.4  | 0.66   | 0.24 | 1.1  | 0.91 | 3.98  | 1.67 | 1.66  | 0.17  | 0.53  | 1.66  | 1.18  | 0.3    | 1.16 | 0.45  | 4971  | 0.28   | 1.34 | 0.15   | 1.53   | 1.21  | 1.28  | 1.13   |
| IM 5 18h 26.11.09 | 0.32 | 0.65   | 0.18 | 0.86 | 1.02 | 0.52  | 1.32 | 0.78  | 0.18  | 0.32  | 0.31  | 0.98  | 0.24   | 1.03 | 0.34  | 3286  | 0.32   | 1.07 | 0.09   | 1.98   | 1.16  | 0.57  | 0.64   |
| IM 1 30h 08.01.10 | 0.34 | 0.55   | 0.6  | 1.05 | 1.07 | 1.45  | 0.97 | 0.82  | 1.28  | 0.61  | 0.73  | 1.05  | 0.76   | 1.08 | 0.42  | 4.38  | 0.52   | 1.04 | 0.52   | 1.73   | 1.15  | 0.53  | 0.37   |
| IM 2 30h 08.01.10 | 1.23 | 1.16   | 4.15 | 1.03 | 1.15 | 1.1   | 0.99 | 1.35  | 2.07  | 2.17  | 1.88  | 1.22  | 2.95   | 1.1  | 1.33  | 0.05  | 5.39   | 1.02 | 1.05   | 1.4    | 1.15  | 0.97  | 2.27   |
| IM 3 30h 08.01.10 | 1    | 0.79   | 0.88 | 1.03 | 1.01 | 0.87  | 1.11 | 2.15  | 1.01  | 0.84  | 0.89  | 0.64  | 1.01   | 1.05 | 0.85  | 7.34  | 0.72   | 0.88 | 1.08   | 1.15   | 1.19  | 0.88  | 1.28   |
| IM 3 30h 15.12.09 | 1.15 | 1.1    | 3.15 | 1.53 | 0.99 | 1.38  | 1.09 | 1.47  | 1.28  | 1.39  | 3.61  | 1.09  | 1.06   | 1.2  | 1.54  | 2.81  | 3.46   | 1.33 | 2.86   | 1.37   | 1.39  | 1.11  | 2.43   |
| IM 4 30h 15.12.09 | 0.23 | 0.88   | 0.1  | 1.01 | 1.06 | 0.63  | 1.13 | 0.77  | 1.11  | 0.41  | 0.63  | 1.07  | 1.1    | 1.25 | 0.49  | 5.86  | 0.38   | 0.97 | 0.44   | 1.99   | 1.4   | 0.65  | 0.27   |
| IM 1 2d 03.12.09  | 0.85 | 1.65   | 2.29 | 1.6  | 1.28 | 0.54  | 0.93 | 1.33  | 5.72  | 2.38  | 1.14  | 1.33  | 0.88   | 1.18 | 0.71  | 3.11  | 1.09   | 1.26 | 2.12   | 0.76   | 1.05  | 1.03  | 1.5    |
| IM 2 2d 03.12.09  | 1.13 | 1.27   | 2.89 | 1.77 | 0.93 | 2.32  | 1.33 | 1.53  | 3.95  | 2.7   | 2.82  | 1.11  | 1.27   | 1.2  | 1.19  | 24.8  | 0.92   | 1.84 | 3.38   | 0.82   | 1.31  | 1.25  | 2.01   |
| IM 3 2d 10.12.09  | 0.45 | 2.36   | 2.84 | 1.02 | 3.2  | 1.63  | 0.91 | 0     | 5.35  | 1.45  | 0.4   | 0.45  | 0.0002 | 1.12 | 1.16  | 27.7  | 0      | 1.34 | 0.81   | 0.84   | 1.13  | 1.28  | 0.47   |
| IM 4 2d 10.12.09  | 0.61 | 0.66   | 0.61 | 0.54 | 0.96 | 0.55  | 0.87 | 0.97  | 0.38  | 0.56  | 0.37  | 0.87  | 1.16   | 0.97 | 0.68  | 10.5  | 1.46   | 0.58 | 0.66   | 1.47   | 0.79  | 0.72  | 0.26   |
| IM 5 2d 10.12.09  | 0.67 | 1.11   | 0.77 | 1.14 | 1.17 | 0.75  | 1.19 | 0.99  | 2.26  | 1.37  | 0.33  | 1.11  | 0.65   | 1.27 | 0.97  | 22.3  | 0.27   | 0.91 | 1.43   | 1.78   | 1.2   | 0.76  | 1.01   |
| IM 1 5d 21.04.10  | 2.1  | 1.22   | 4.47 | 1.38 | 1    | 1.26  | 0.62 | 1.99  | 5.3   | 2.57  | 1.4   | 0.8   | 1.22   | 0.9  | 2.04  | 14.7  | 2.25   | 0.9  | 5.89   | 0.6    | 0.79  | 1.55  | 2.09   |
| IM 2 5d 21.04.10  | 3.34 | 2.5    | 15.6 | 2.63 | 1.52 | 2.3   | 1.47 | 2.85  | 15.3  | 14.9  | 6.52  | 2.37  | 6.61   | 1.59 | 4.73  | 25.3  | 15.3   | 2.5  | 19.5   | 0.42   | 1.47  | 2.46  | 6.33   |
| IM 3 5d 21.04.10  | 1.39 | 1.27   | 6.54 | 1.32 | 1.06 | 1.22  | 0.7  | 1.39  | 5.55  | 3.24  | 1.78  | 1.17  | 1.86   | 0.85 | 2.45  | 5.21  | 3.13   | 1.19 | 7.83   | 0.34   | 0.72  | 1.34  | 1.51   |
| IM 4 5d 07.12.09  | 1.36 | 1.17   | 3.33 | 0.96 | 0.98 | 1.05  | 0.58 | 1.44  | 4.53  | 3.43  | 1.22  | 0.82  | 0.74   | 0.79 | 2.23  | 7.58  | 6.96   | 0.87 | 6.23   | 0.41   | 0.74  | 1.25  | 2.27   |
| IM 5 5d 21.04.10  | 2.98 | 1.92   | 4.32 | 1.95 | 1.3  | 0.91  | 1.19 | 2.31  | 7.12  | 2.58  | 1.99  | 1.57  | 5.51   | 1.14 | 2.42  | 2.32  | 7.26   | 1.25 | 7.11   | 0.69   | 1.2   | 1.69  | 3.36   |
| IM 4 5d 21.04.10  | n.m. | n.m.   | n.m. | n.m. | n.m. | n.m.  | n.m. | n.m.  | n.m.  | n.m.  | n.m.  | n.m.  | n.m.   | n.m. | n.m.  | n.m.  | n.m.   | n.m. | n.m.   | n.m.   | n.m.  | n.m.  | n.m.   |
| IM 1 14d 09.12.09 | 3.57 | 1.34   | 4.46 | 1.01 | 1.08 | 1.64  | 0.67 | 2.55  | 1.31  | 2.92  | 1.47  | 1.1   | 3.44   | 0.87 | 4.12  | 10.6  | 3.81   | 0.95 | 8.55   | 0.5    | 1.06  | 1.96  | 2.03   |
| IM 2 14d 09.12.09 | 9.42 | 1.84   | 15.2 | 1.52 | 1.2  | 2.45  | 0.94 | 3.46  | 4.41  | 9.59  | 5.37  | 1.35  | 5.93   | 1.01 | 10.1  | 42.8  | 20.6   | 1.54 | 22.4   | 0.27   | 0.97  | 1.91  | 4.92   |
| IM 3 14d 09.12.09 | 3.68 | 1.41   | 4.49 | 1.08 | 1.22 | 1.49  | 0.8  | 2.08  | 2.01  | 4.11  | 1.91  | 1.09  | 2.03   | 1.06 | 5.01  | 13.8  | 8.77   | 0.92 | 7.13   | 0.5    | 1.06  | 1.33  | 1.45   |
| IM 1 14d 16.12.09 | 4.73 | 2.41   | 15.5 | 1.95 | 1.39 | 2.11  | 1.04 | 2.62  | 9.13  | 8.2   | 4.64  | 2.27  | 4.5    | 1.25 | 6.69  | 26    | 14     | 1.82 | 20.5   | 0.39   | 1.13  | 2.23  | 4.93   |
| IM 2 14d 16.12.09 | 4.71 | 1.9    | 10.3 | 1.79 | 0.99 | 1.62  | 0.74 | 1.67  | 7.42  | 5.86  | 4.13  | 1.37  | 4.46   | 1.04 | 5.73  | 15.6  | 24.2   | 1.58 | 11.4   | 0.26   | 0.91  | 1.64  | 1.82   |

## 4 RNA Zytokine genes

| ID                | Ccl2 | Ifnb1 | Cd86 | Met  | Il28b               | Tnfrsf1a | Il1b | Il17a               | Cxcl5 | Cxcr1 | Ifnar1 | Osmr | Tgfb1 | Ifng  | Ccl4 | Ccl5 | Ccr3 | Il1rn | Il13  | Tnfrsf1b | Ccl7 | Osm  | Cd69 | Il10rb |
|-------------------|------|-------|------|------|---------------------|----------|------|---------------------|-------|-------|--------|------|-------|-------|------|------|------|-------|-------|----------|------|------|------|--------|
| IM 1 0h 17.12.09  | 0.1  | 0.45  | 0.44 | 0.92 | 33.2                | 0.52     | 1.05 | 0.02                | 11.7  | 0.28  | 0.85   | 0.21 | 0.6   | 0.28  | 0.29 | 0.38 | 0.47 | 0.29  | 0.002 | 0.55     | 0.12 | 0.21 | 0.64 | 0.58   |
| IM 2 0h 17.12.09  | 0.27 | 3.01  | 0.71 | 0.94 | 18.3                | 0.65     | 0.59 | 0.01                | 0.22  | 2.25  | 1.02   | 0.5  | 0.82  | 4.31  | 0.54 | 1.3  | 1.61 | 0.22  | 0.001 | 1.08     | 0.34 | 0.44 | 1.62 | 0.82   |
| IM 3 0h 06.01.10  | 0.11 | 0.05  | 0.47 | 0.72 | 101.9               | 0.39     | 0.24 | 0.03                | 0.06  | 0.02  | 0.77   | 0.09 | 0.59  | 0.67  | 0.22 | 0.29 | 0.26 | 0.1   | 0.004 | 0.83     | 0.04 | 0.04 | 0.49 | 0.4    |
| IM 4 0h 06.01.10  | 0.05 | 0.25  | 0.38 | 0.64 | 122.2               | 0.4      | 0.2  | 0.02                | 0.01  | 0.24  | 0.58   | 0.19 | 0.6   | 0.36  | 0.18 | 0.31 | 0.37 | 0.11  | 0.002 | 0.64     | 0.07 | 0.1  | 0.19 | 0.47   |
| IM 5 0h 06.01.10  | 0.05 | 2.69  | 0.41 | 0.72 | 59.6                | 0.46     | 0.37 | 0.02                | 0.02  | 1.8   | 0.49   | 0.18 | 0.55  | 0.2   | 0.09 | 0.29 | 1.27 | 0.1   | 0.002 | 0.6      | 0.02 | 0.11 | 0.41 | 0.47   |
| IM 2 6h 11.12.09  | 0.1  | 1.82  | 0.45 | 0.5  | 0.004               | 0.96     | 0.28 | 0.01                | 0.03  | 1.26  | 0.71   | 0.66 | 0.53  | 0.2   | 0.22 | 0.29 | 1    | 0.14  | 0.002 | 0.56     | 0.14 | 0.15 | 0.22 | 0.5    |
| IM 3 6h 11.12.09  | 0.17 | 0.53  | 0.49 | 0.42 | 0.004               | 1.04     | 0.27 | 0.01                | 0.03  | 0.31  | 0.68   | 1.02 | 0.43  | 0.24  | 0.45 | 0.23 | 0.26 | 0.32  | 0.002 | 0.4      | 0.17 | 0.23 | 0.18 | 0.48   |
| IM 4 6h 11.12.09  | 0.15 | 0.46  | 0.32 | 0.56 | 0.004               | 0.99     | 0.3  | 0.01                | 0.05  | 0.22  | 0.62   | 0.63 | 0.43  | 0.15  | 0.21 | 0.37 | 0.24 | 0.2   | 0.002 | 0.69     | 0.13 | 0.39 | 0.15 | 0.35   |
| IM 3 6h 01.12.09  | 0.21 | 2.51  | 0.68 | 0.69 | 0.01                | 1.22     | 0.39 | 0.02                | 0.65  | 2.14  | 0.86   | 1    | 0.57  | 0.32  | 0.4  | 0.25 | 1.48 | 0.49  | 0.003 | 0.79     | 0.31 | 0.34 | 0.32 | 0.49   |
| IM 4 6h 01.12.09  | 0.16 | 0.75  | 0.46 | 0.96 | 0.004               | 1.1      | 0.32 | 0.01                | 0.22  | 0.38  | 0.75   | 0.97 | 0.47  | 0.004 | 0.28 | 0.3  | 0.36 | 0.27  | 0.002 | 0.48     | 0.39 | 0.25 | 0.29 | 0.47   |
| IM 1 12h 08.12.09 | 1.83 | 1.39  | 0.81 | 0.99 | 0.004               | 0.86     | 1.51 | 0.01                | 1.12  | 1.18  | 1.03   | 1.04 | 0.76  | 1.13  | 1.46 | 1.16 | 0.67 | 1.66  | 240.5 | 0.87     | 1.49 | 2.05 | 0.74 | 0.98   |
| IM 2 12h 08.12.09 | 1.03 | 0.55  | 0.57 | 0.98 | 0.01                | 0.62     | 1.19 | 0.02                | 1.16  | 0.56  | 0.8    | 0.46 | 0.59  | 0.9   | 0.66 | 0.4  | 0.74 | 1.22  | 14.4  | 0.71     | 0.98 | 1.06 | 0.38 | 0.74   |
| IM 1 12h 11.12.09 | 0.36 | 0.26  | 0.26 | 0.82 | 0.004               | 0.75     | 0.29 | 0.01                | 0.12  | 0.36  | 0.68   | 0.51 | 0.31  | 0.06  | 0.28 | 0.18 | 0.17 | 0.88  | 5.84  | 0.69     | 0.32 | 0.38 | 0.15 | 0.55   |
| IM 1 12h 14.12.09 | 0.51 | 0.45  | 0.47 | 1.41 | 0.004               | 0.77     | 0.86 | 0.01                | 0.21  | 0.35  | 0.84   | 0.51 | 0.39  | 0.38  | 0.5  | 0.34 | 0.39 | 0.97  | 10.5  | 0.75     | 0.56 | 0.67 | 0.36 | 0.62   |
| IM 2 12h 14.12.09 | 0.39 | 1.05  | 0.41 | 1.13 | 0.01                | 0.8      | 0.4  | 0.02                | 0.22  | 0.12  | 0.9    | 1.35 | 0.43  | 0.34  | 0.22 | 0.24 | 0.11 | 0.82  | 8.41  | 0.63     | 0.44 | 0.19 | 0.26 | 0.7    |
| IM 1 18h 17.12.09 | 1.97 | 0.91  | 0.55 | 1.21 | 0.01                | 0.86     | 5.31 | 0.03                | 3.74  | 1.05  | 1.23   | 0.52 | 0.69  | 0.5   | 5.03 | 0.61 | 0.93 | 1.1   | 29.1  | 0.78     | 3.59 | 1.56 | 0.58 | 0.85   |
| IM 2 18h 17.12.09 | 0.94 | 1.33  | 0.53 | 0.91 | 0.005               | 1.02     | 0.66 | 0.02                | 0.48  | 0.99  | 1.02   | 0.72 | 0.5   | 0.47  | 0.71 | 0.36 | 0.72 | 1.08  | 6.89  | 0.74     | 1.48 | 0.57 | 0.23 | 0.67   |
| IM 3 18h 17.12.09 | 0.57 | 1.88  | 0.39 | 0.81 | 0.01                | 0.72     | 0.65 | 0.03                | 0.2   | 1.82  | 0.87   | 0.23 | 0.43  | 0.32  | 0.4  | 0.32 | 1.53 | 0.47  | 1.41  | 0.76     | 0.55 | 0.71 | 0.37 | 0.49   |
| IM 4 18h 26.11.09 | 2.67 | 0.21  | 0.77 | 1.22 | 0.01                | 1.37     | 1.48 | 0.02                | 1.22  | 0.45  | 1.16   | 1.16 | 0.64  | 0.24  | 0.97 | 0.38 | 0.32 | 7.51  | 16.3  | 1.22     | 1.38 | 2.07 | 0.74 | 0.85   |
| IM 5 18h 26.11.09 | 0.29 | 0.14  | 0.41 | 0.86 | 0.01                | 0.94     | 0.31 | 0.02                | 0.19  | 0.29  | 0.85   | 0.55 | 0.4   | 0.35  | 0.33 | 0.3  | 0.24 | 0.71  | 7.98  | 0.82     | 0.29 | 0.28 | 0.32 | 0.5    |
| IM 1 30h 08.01.10 | 1.04 | 0.69  | 0.87 | 1.02 | 0.01                | 0.99     | 0.76 | 0.02                | 1.23  | 0.67  | 0.82   | 0.35 | 0.76  | 0.18  | 0.52 | 0.56 | 0.42 | 0.84  | 0.003 | 0.8      | 0.67 | 1.08 | 0.37 | 0.74   |
| IM 2 30h 08.01.10 | 0.97 | 1.22  | 1.06 | 1.03 | 0.01                | 0.96     | 2.14 | 0.02                | 3.08  | 1.47  | 0.84   | 0.57 | 0.86  | 0.19  | 0.74 | 0.81 | 1.12 | 0.99  | 0.003 | 0.93     | 1.15 | 0.31 | 1.04 | 0.94   |
| IM 3 30h 08.01.10 | 1.48 | 0.37  | 0.77 | 0.92 | 0.004               | 0.95     | 0.68 | 0.01                | 0.9   | 0.28  | 0.79   | 0.75 | 0.78  | 0.15  | 0.58 | 0.47 | 0.37 | 1.21  | 0.002 | 0.9      | 1.39 | 0.46 | 0.14 | 0.71   |
| IM 3 30h 15.12.09 | 3.71 | 0.28  | 0.82 | 1.28 | 0.01                | 1.18     | 1.06 | 0.03                | 2.21  | 0.28  | 1.12   | 1.46 | 1.44  | 0.44  | 1.2  | 0.87 | 0.23 | 2.3   | 0.004 | 1.1      | 3.09 | 0.29 | 0.33 | 1.3    |
| IM 4 30h 15.12.09 | 0.97 | 1.69  | 0.68 | 0.87 | 0.01                | 1.18     | 0.41 | 0.02                | 0.89  | 1.26  | 1.01   | 0.28 | 0.74  | 0.42  | 0.39 | 0.5  | 0.73 | 0.94  | 0.002 | 0.79     | 0.81 | 0.09 | 0.43 | 0.74   |
| IM 1 2d 03.12.09  | 1.05 | 1.09  | 0.97 | 0.95 | 0.01                | 1.24     | 0.69 | 0.04                | 1.04  | 0.78  | 0.98   | 1.07 | 1.5   | 0.42  | 0.39 | 0.88 | 0.76 | 0.83  | 0.005 | 0.85     | 0.63 | 0.35 | 0.74 | 1.16   |
| IM 2 2d 03.12.09  | 3.93 | 0.12  | 1.06 | 0.79 | 0.01                | 1.62     | 1.38 | 0.03                | 3.09  | 0.31  | 1.09   | 1.81 | 1.62  | 0.21  | 2.22 | 1.04 | 0.31 | 6.52  | 0.003 | 1.19     | 2.46 | 1.75 | 0.36 | 1.36   |
| IM 3 2d 10.12.09  | 2.45 | 0.15  | 1.48 | 1.25 | 0.002               | 0.88     | 1.02 | 0.01                | 2.89  | 0.62  | 1.01   | 1.01 | 1.47  | 2.7   | 1.57 | 1.96 | 1.41 | 1.51  | 0.001 | 1.09     | 1.97 | 1.17 | 2.58 | 1.19   |
| IM 4 2d 10.12.09  | 0.61 | 0.75  | 0.34 | 0.88 | 0.004               | 0.69     | 0.38 | 0.01                | 0.74  | 0.46  | 0.61   | 0.29 | 0.47  | 0.15  | 0.17 | 0.4  | 0.35 | 0.76  | 0.002 | 0.6      | 0.49 | 0.2  | 0.2  | 0.47   |
| IM 5 2d 10.12.09  | 0.86 | 0.04  | 1    | 1.11 | 0.01                | 1.21     | 0.43 | 0.03                | 0.6   | 0.1   | 0.93   | 0.75 | 0.81  | 0.32  | 0.39 | 0.82 | 0.45 | 0.9   | 0.003 | 0.88     | 0.5  | 0.32 | 0.56 | 0.83   |
| IM 1 5d 21.04.10  | 1.98 | 0.05  | 1.69 | 0.86 | 1.3·10 <sup>5</sup> | 0.9      | 0.82 | 28068               | 4.63  | 0.22  | 0.84   | 1.48 | 1.57  | 0.6   | 1.18 | 0.67 | 0.36 | 1.59  | 3590  | 1.02     | 1.43 | 1.28 | 1.07 | 1.38   |
| IM 2 5d 21.04.10  | 5.9  | 0.11  | 3.57 | 0.96 | 1.6·10 <sup>5</sup> | 1.29     | 3.84 | 5.6·10 <sup>5</sup> | 7.53  | 0.48  | 1.92   | 2.39 | 2.93  | 0.38  | 4.58 | 1.63 | 1.23 | 3.32  | 4384  | 1.57     | 4.51 | 2.52 | 2.43 | 2.84   |
| IM 3 5d 21.04.10  | 7.99 | 10.6  | 6.04 | 1.62 | 42785               | 1.67     | 4.21 | 1.7·10 <sup>5</sup> | 16.4  | 13.6  | 1.72   | 6.13 | 4.36  | 85.4  | 13.7 | 13.4 | 11.6 | 4.42  | 21087 | 2.27     | 13   | 27.9 | 27.3 | 3.72   |
| IM 4 5d 07.12.09  | 7.66 | 12.4  | 5.73 | 1.94 | 52813               | 1.67     | 3.55 | 1.9·10 <sup>5</sup> | 13.5  | 14.3  | 1.51   | 6.54 | 3.99  | 97.2  | 11.3 | 14.5 | 11.4 | 3.6   | 25447 | 2.07     | 11.2 | 30.4 | 28.4 | 3.31   |
| IM 5 5d 21.04.10  | 6.64 | 26.7  | 5.89 | 1.73 | 51020               | 2.15     | 5.06 | 2.3·10 <sup>5</sup> | 12.1  | 26.4  | 1.8    | 7.87 | 3.79  | 100.9 | 11.3 | 13.2 | 15.3 | 3.2   | 29188 | 2.57     | 9.71 | 31.5 | 28.5 | 3.44   |
| IM 4 5d 21.04.10  | n.m. | n.m.  | n.m. | n.m. | n.m.                | n.m.     | n.m. | n.m.                | n.m.  | n.m.  | n.m.   | n.m. | n.m.  | n.m.  | n.m. | n.m. | n.m. | n.m.  | n.m.  | n.m.     | n.m. | n.m. | n.m. | n.m.   |
| IM 1 14d 09.12.09 | 9.53 | 29.3  | 6.04 | 1.95 | 77189               | 1.71     | 6.13 | 2.9·10 <sup>5</sup> | 21.3  | 27.5  | 1.92   | 9.15 | 4.61  | 163   | 14.1 | 19   | 20.1 | 3.89  | 42653 | 2.44     | 15.1 | 45.7 | 39.4 | 4.2    |
| IM 2 14d 09.12.09 | 13.3 | 25.1  | 7.82 | 1.95 | 1.3·10 <sup>5</sup> | 1.95     | 9.86 | 3.8·10 <sup>5</sup> | 25.4  | 31.8  | 1.98   | 11.8 | 6.05  | 195   | 23.5 | 32   | 24.8 | 5.13  | 52699 | 3.12     | 19.7 | 56.2 | 53.7 | 5      |
| IM 3 14d 09.12.09 | 7.65 | 14.6  | 4.08 | 1.41 | 35968               | 1.34     | 3.05 | 1.5·10 <sup>5</sup> | 16    | 16.2  | 1.49   | 5.63 | 3.05  | 67.5  | 8.54 | 10.4 | 10.5 | 2.45  | 17743 | 2.37     | 7.87 | 19.6 | 19.3 | 2.86   |
| IM 1 14d 16.12.09 | 11.4 | 19.9  | 7.91 | 1.49 | 65051               | 1.68     | 7.76 | 2.6·10 <sup>5</sup> | 22.2  | 21    | 2.23   | 8.51 | 5.33  | 115.4 | 18.7 | 35.9 | 15   | 4.53  | 31449 | 3.09     | 13.9 | 41.6 | 39   | 4.79   |
| IM 2 14d 16.12.09 | 11.3 | 11.4  | 6.47 | 1.1  | 25608               | 1.61     | 6.57 | 1.1·10 <sup>5</sup> | 16.5  | 12.2  | 1.69   | 5.04 | 4.75  | 67.3  | 13.6 | 21.4 | 10.2 | 3.89  | 12399 | 2.8      | 12.4 | 17.4 | 19.3 | 3.69   |

| ID                | Il2    | Cd14 | Cxcr2 | Cxcl1 | Tnf  | Il10ra | Il10  | Ccr2 | Egf  | Hgf  | Ifna1 | Ifnar2 | Cxcl2 | Mrc1 | Ccr5 | Ccl3 | Il6  | Actb | Il4   | Egfr | Ccl8  | Cxcl3 | Il6st |
|-------------------|--------|------|-------|-------|------|--------|-------|------|------|------|-------|--------|-------|------|------|------|------|------|-------|------|-------|-------|-------|
| IM 1 0h 17.12.09  | 4.15   | 0.17 | 0.39  | 0.04  | 0.48 | 0.62   | 0.16  | 0.19 | 0.39 | 0.6  | 0.61  | 0.93   | 0.06  | 0.77 | 0.34 | 0.3  | 0.22 | 0.61 | 0.23  | 0.76 | 0.44  | 0.09  | 0.63  |
| IM 2 0h 17.12.09  | 181.4  | 0.12 | 0.27  | 0.11  | 0.63 | 0.91   | 2.16  | 0.41 | 1.49 | 1.3  | 3.12  | 0.91   | 0.09  | 1.2  | 1.13 | 0.57 | 0.48 | 0.6  | 2.81  | 1.73 | 2.65  | 0.44  | 0.81  |
| IM 3 0h 06.01.10  | 29.6   | 0.06 | 0.06  | 0.02  | 0.16 | 0.55   | 0.28  | 0.1  | 0.45 | 0.56 | 0.02  | 0.8    | 0.01  | 0.68 | 0.4  | 0.1  | 0.11 | 0.74 | 0.36  | 0.88 | 0.76  | 0.13  | 0.56  |
| IM 4 0h 06.01.10  | 14.6   | 0.1  | 0.17  | 0.06  | 0.17 | 0.52   | 0.19  | 0.13 | 0.31 | 0.46 | 0.31  | 0.72   | 0.02  | 0.94 | 0.35 | 0.11 | 0.08 | 0.42 | 0.38  | 1.14 | 0.65  | 0.04  | 0.53  |
| IM 5 0h 06.01.10  | 4.38   | 0.09 | 0.24  | 0.46  | 0.26 | 0.49   | 0.15  | 0.21 | 0.5  | 0.46 | 3.3   | 0.71   | 0.04  | 0.66 | 0.46 | 0.23 | 0.14 | 0.46 | 0.27  | 1.15 | 0.05  | 0.09  | 0.57  |
| IM 2 6h 11.12.09  | 8.23   | 0.21 | 0.23  | 1.09  | 0.19 | 0.42   | 0.19  | 0.17 | 0.67 | 0.81 | 2.68  | 0.74   | 0.18  | 0.96 | 0.46 | 0.21 | 0.2  | 0.69 | 0.31  | 1.94 | 0.11  | 0.04  | 0.97  |
| IM 3 6h 11.12.09  | 2.77   | 0.25 | 0.36  | 1.19  | 0.25 | 0.26   | 0.32  | 0.14 | 0.41 | 0.67 | 0.64  | 0.68   | 0.36  | 0.59 | 0.29 | 0.54 | 0.22 | 0.71 | 0.22  | 1.64 | 0.08  | 0.07  | 1.02  |
| IM 4 6h 11.12.09  | 6.51   | 0.26 | 0.51  | 1.56  | 0.2  | 0.29   | 0.31  | 0.13 | 0.63 | 0.53 | 0.39  | 0.69   | 0.93  | 0.59 | 0.28 | 0.11 | 0.18 | 0.63 | 0.17  | 1.75 | 0.08  | 0.07  | 0.84  |
| IM 3 6h 01.12.09  | 0.23   | 0.37 | 0.6   | 2.38  | 0.3  | 0.55   | 0.41  | 0.23 | 0.89 | 0.58 | 2.76  | 0.68   | 0.38  | 0.81 | 0.45 | 0.63 | 0.44 | 0.81 | 0.001 | 1.94 | 0.14  | 0.22  | 1.06  |
| IM 4 6h 01.12.09  | 0.29   | 0.19 | 0.31  | 3.25  | 0.2  | 0.39   | 0.3   | 0.19 | 0.6  | 0.92 | 0.43  | 0.83   | 0.66  | 0.83 | 0.32 | 0.34 | 0.33 | 0.73 | 0.55  | 1.64 | 0.1   | 0.53  | 1.09  |
| IM 1 12h 08.12.09 | 46.6   | 1.4  | 1.87  | 1.71  | 1.42 | 0.86   | 1.05  | 0.93 | 1.18 | 0.84 | 1.28  | 0.85   | 5.45  | 0.66 | 0.96 | 1.44 | 1.47 | 0.84 | 1.64  | 1.05 | 1.06  | 1.86  | 0.91  |
| IM 2 12h 08.12.09 | 51.2   | 1.1  | 1.29  | 1     | 0.78 | 0.42   | 0.13  | 0.62 | 0.33 | 0.68 | 1.05  | 0.89   | 4.59  | 0.71 | 0.4  | 0.55 | 0.65 | 0.78 | 0.13  | 0.98 | 0.36  | 0.85  | 0.87  |
| IM 1 12h 11.12.09 | 13.9   | 0.65 | 0.5   | 1.27  | 0.35 | 0.26   | 0.17  | 0.19 | 0.43 | 0.3  | 0.36  | 0.63   | 0.81  | 0.41 | 0.24 | 0.26 | 0.16 | 1.04 | 0.33  | 1.04 | 0.12  | 0.47  | 0.69  |
| IM 1 12h 14.12.09 | 7.09   | 0.57 | 0.71  | 0.84  | 0.54 | 0.41   | 0.18  | 0.37 | 0.34 | 0.34 | 0.63  | 0.91   | 2.39  | 0.54 | 0.33 | 0.46 | 0.41 | 0.73 | 0.7   | 1.09 | 0.11  | 0.48  | 0.9   |
| IM 2 12h 14.12.09 | 42.8   | 0.42 | 0.48  | 2.89  | 0.23 | 0.29   | 0.07  | 0.27 | 0.4  | 0.58 | 0.13  | 0.79   | 0.83  | 0.61 | 0.35 | 0.21 | 0.47 | 1.26 | 0.64  | 1.42 | 0.32  | 0.31  | 1.07  |
| IM 1 18h 17.12.09 | 0.001  | 1.4  | 0.96  | 3.43  | 11.2 | 0.65   | 6.91  | 0.67 | 0.3  | 0.52 | 1.6   | 1.27   | 6.91  | 0.58 | 0.36 | 5.48 | 19.8 | 1.37 | 0.56  | 0.74 | 1.68  | 4.48  | 1     |
| IM 2 18h 17.12.09 | 0.001  | 1.58 | 1.03  | 1.56  | 0.56 | 0.44   | 0.28  | 0.36 | 0.5  | 0.32 | 1.18  | 0.78   | 1.29  | 0.42 | 0.4  | 0.71 | 0.71 | 1.19 | 0.33  | 1.05 | 0.04  | 1.76  | 0.9   |
| IM 3 18h 17.12.09 | 0.001  | 0.7  | 0.52  | 0.63  | 0.63 | 0.34   | 0.41  | 0.27 | 0.3  | 0.29 | 2.99  | 0.78   | 0.62  | 0.35 | 0.22 | 0.63 | 0.97 | 1.04 | 0.39  | 0.74 | 0.08  | 1.33  | 0.67  |
| IM 4 18h 26.11.09 | 0.001  | 4.55 | 2.98  | 6.37  | 0.8  | 0.55   | 0.28  | 1.03 | 0.82 | 0.59 | 0.54  | 1.26   | 11.7  | 0.45 | 0.39 | 0.91 | 0.3  | 1.37 | 0.2   | 1.57 | 0.31  | 2.03  | 1.3   |
| IM 5 18h 26.11.09 | 0.001  | 0.59 | 0.45  | 2.57  | 0.15 | 0.34   | 0.08  | 0.4  | 0.8  | 0.33 | 0.36  | 0.9    | 0.33  | 0.41 | 0.26 | 0.43 | 0.15 | 0.93 | 0.48  | 1.07 | 0.47  | 0.18  | 0.8   |
| IM 1 30h 08.01.10 | 0.001  | 0.93 | 0.61  | 2     | 0.46 | 0.53   | 0.05  | 0.92 | 0.35 | 0.53 | 0.88  | 1.17   | 1.7   | 0.6  | 0.58 | 0.45 | 0.4  | 1.06 | 0.26  | 1.23 | 0.12  | 0.91  | 0.95  |
| IM 2 30h 08.01.10 | 0.001  | 2.24 | 1.13  | 1.44  | 0.76 | 0.94   | 1.96  | 1.11 | 0.29 | 0.5  | 2.01  | 1.06   | 1.03  | 1.13 | 0.86 | 0.8  | 3.08 | 0.96 | 0.2   | 0.97 | 1.54  | 0.84  | 0.92  |
| IM 3 30h 08.01.10 | 0.001  | 1.52 | 1.04  | 1.17  | 0.82 | 0.53   | 0.58  | 0.71 | 0.28 | 0.62 | 0.67  | 0.96   | 2.17  | 0.59 | 0.47 | 0.83 | 0.44 | 0.83 | 0.25  | 0.77 | 0.37  | 1.01  | 0.8   |
| IM 3 30h 15.12.09 | 0.001  | 2.34 | 1.25  | 2.46  | 0.95 | 0.65   | 0.25  | 2.24 | 0.3  | 1.77 | 0.39  | 1.32   | 2.55  | 0.87 | 0.54 | 0.98 | 1.05 | 1.39 | 0.33  | 0.65 | 0.95  | 1.12  | 1.43  |
| IM 4 30h 15.12.09 | 0.001  | 0.94 | 0.44  | 1.38  | 0.78 | 0.54   | 0.26  | 0.46 | 0.58 | 0.39 | 2.29  | 1.09   | 0.47  | 0.46 | 0.77 | 0.34 | 0.38 | 0.93 | 0.23  | 0.82 | 0.36  | 0.28  | 0.83  |
| IM 1 2d 03.12.09  | 0.001  | 0.94 | 0.59  | 1.89  | 0.5  | 0.66   | 0.03  | 1.48 | 0.41 | 1.61 | 1.97  | 1.16   | 0.39  | 1.08 | 0.8  | 0.42 | 0.42 | 1.31 | 0.32  | 0.83 | 0.16  | 0.31  | 1.15  |
| IM 2 2d 03.12.09  | 0.001  | 5.22 | 1.8   | 2.2   | 1.36 | 1      | 0.5   | 2.55 | 0.43 | 0.94 | 0.16  | 1.09   | 4.64  | 0.92 | 1.03 | 2.35 | 0.64 | 1.52 | 0.65  | 0.77 | 0.1   | 1.88  | 1.27  |
| IM 3 2d 10.12.09  | 0.0003 | 2.05 | 1.96  | 0.57  | 1.07 | 1.67   | 3.86  | 4.56 | 1.08 | 1.12 | 0.71  | 1.2    | 1.72  | 1.6  | 2.22 | 1.13 | 1.21 | 1.51 | 2.84  | 0.9  | 3.73  | 2.05  | 1.18  |
| IM 4 2d 10.12.09  | 0.001  | 0.94 | 0.51  | 0.75  | 0.22 | 0.4    | 0.27  | 0.6  | 0.61 | 0.42 | 0.78  | 0.99   | 0.46  | 0.68 | 0.24 | 0.29 | 0.33 | 0.61 | 0.07  | 0.57 | 0.06  | 0.22  | 0.6   |
| IM 5 2d 10.12.09  | 0.001  | 0.94 | 0.45  | 2.4   | 0.32 | 0.65   | 0.34  | 0.93 | 0.49 | 0.69 | 0.2   | 1.3    | 0.41  | 1.07 | 0.81 | 0.33 | 0.18 | 0.96 | 0.27  | 1.26 | 0.07  | 0.2   | 1.2   |
| IM 1 5d 21.04.10  | 0.6    | 2.2  | 0.75  | 0.4   | 0.91 | 1.62   | 0.55  | 2.56 | 0.57 | 1.81 | 0.02  | 0.94   | 0.65  | 1.58 | 0.98 | 1.24 | 1.5  | 0.97 | 0.32  | 0.52 | 0.31  | 1.11  | 0.96  |
| IM 2 5d 21.04.10  | 33.4   | 4.89 | 3.1   | 2.2   | 2.77 | 3.1    | 1.1   | 7.28 | 1.02 | 2.16 | 0.003 | 1.64   | 2.86  | 2.22 | 2.3  | 3.11 | 1.52 | 2.62 | 0.96  | 0.74 | 3.97  | 1.86  | 1.62  |
| IM 3 5d 21.04.10  | 6111   | 4.41 | 7.38  | 0.84  | 11.4 | 8.32   | 66.7  | 12.3 | 12.1 | 5.16 | 5.35  | 1.23   | 4.97  | 3.04 | 11.2 | 10.6 | 18.4 | 1.35 | 84.7  | 1.02 | 125.3 | 23.9  | 1.5   |
| IM 4 5d 07.12.09  | 6301   | 2.65 | 5.65  | 1.09  | 12.3 | 8.31   | 79    | 11.1 | 14   | 5.34 | 7.15  | 1.22   | 5.11  | 3.42 | 12.9 | 10.9 | 18.2 | 1.2  | 106.2 | 0.74 | 149.3 | 24.4  | 1.55  |
| IM 5 5d 21.04.10  | 8093   | 3.36 | 6.09  | 1.05  | 11.2 | 7.93   | 92.2  | 10.5 | 16.9 | 6.57 | 21.1  | 1.37   | 4.72  | 3.19 | 15.2 | 10.8 | 24.7 | 1.45 | 115.8 | 1.33 | 193.3 | 31.9  | 1.72  |
| IM 4 5d 21.04.10  | n.m.   | n.m. | n.m.  | n.m.  | n.m. | n.m.   | n.m.  | n.m. | n.m. | n.m. | n.m.  | n.m.   | n.m.  | n.m. | n.m. | n.m. | n.m. | n.m. | n.m.  | n.m. | n.m.  | n.m.  | n.m.  |
| IM 1 14d 09.12.09 | 12244  | 5.1  | 8.58  | 1.32  | 17.8 | 11     | 123.8 | 15.3 | 23.5 | 7.17 | 22    | 1.46   | 6.61  | 4.24 | 18.5 | 30.5 | 29.9 | 1.34 | 170   | 0.85 | 233.1 | 42    | 1.6   |
| IM 2 14d 09.12.09 | 14869  | 6.05 | 11    | 1.62  | 25.1 | 15     | 165.8 | 20.2 | 29.8 | 7.75 | 14.9  | 1.57   | 8.31  | 4.62 | 25.8 | 22.1 | 38.8 | 1.57 | 207.5 | 0.75 | 312.3 | 47    | 1.58  |
| IM 3 14d 09.12.09 | 4975   | 3.22 | 4.43  | 0.83  | 9.04 | 6.07   | 54.8  | 8.6  | 11.2 | 4.39 | 11.1  | 1.07   | 3.29  | 2.49 | 10.4 | 8.14 | 14.1 | 1.02 | 69.3  | 0.69 | 92    | 16.4  | 1.16  |
| IM 1 14d 16.12.09 | 9207   | 6    | 8.41  | 0.9   | 17   | 13.4   | 84.3  | 16.6 | 15.6 | 6.24 | 11.6  | 1.49   | 4.8   | 3.72 | 19.6 | 16   | 23.2 | 1.69 | 117.2 | 0.94 | 182   | 26.8  | 1.63  |
| IM 2 14d 16.12.09 | 3243   | 6.16 | 4.66  | 1.12  | 11.9 | 9.82   | 46.7  | 15.9 | 7.42 | 3.59 | 8.49  | 1.26   | 3.28  | 3.13 | 14.1 | 10.4 | 13.2 | 1.77 | 54    | 0.72 | 73.3  | 13.5  | 1.16  |
