# Supplementary material for: Pathobiochemical signatures of cholestatic liver disease in bile duct ligated mice
Source: PubMed Central journal article supplement (PMC4654904; doi:10.1186/s12918-015-0229-0), 2015-11-20
Supplement: 12918_2015_229_MOESM2_ESM.pdf [file 12918_2015_229_MOESM2_ESM.pdf]

# Statistical Analysis of Pathobiochemical Signatures in Bile Duct Ligated Mice

*Matthias Koenig (2015-10-22)*

## Contents

|                                                   |           |
|---------------------------------------------------|-----------|
| <b>Introduction</b>                               | <b>2</b>  |
| <b>Explorative data analysis</b>                  | <b>3</b>  |
| Data import . . . . .                             | 3         |
| Gene Probes . . . . .                             | 4         |
| Data visualization . . . . .                      | 7         |
| Actb quality control . . . . .                    | 11        |
| <b>Dimension reduction</b>                        | <b>12</b> |
| ANOVA for single factor . . . . .                 | 13        |
| ANOVA for all factors . . . . .                   | 14        |
| Filter factors . . . . .                          | 17        |
| t-test for initial phase . . . . .                | 20        |
| <b>Correlation analysis</b>                       | <b>21</b> |
| Pearson & Spearman correlation . . . . .          | 22        |
| YS & YR correlation . . . . .                     | 25        |
| <b>Hierarchical clustering</b>                    | <b>27</b> |
| Clustering . . . . .                              | 27        |
| Correlations for non-transcript factors . . . . . | 31        |
| Mean cluster time course . . . . .                | 36        |
| Top cluster representatives . . . . .             | 39        |
| YS3 cluster summary . . . . .                     | 42        |
| <b>Decision trees</b>                             | <b>45</b> |
| Trainings data . . . . .                          | 46        |
| Fit regression tree . . . . .                     | 48        |
| Leave-one-out cross validation . . . . .          | 51        |
| Prediction on trainings data . . . . .            | 52        |
| Test data for evaluation . . . . .                | 54        |
| Prediction on test data . . . . .                 | 56        |

|                                    |    |
|------------------------------------|----|
| Best factor combinations . . . . . | 57 |
| Prediction errors . . . . .        | 61 |
| Predictive performance . . . . .   | 62 |

## Introduction

This document contains the statistical analysis performed in the publication *Pathobiochemical signatures of cholestatic liver disease in bile duct ligated mice*.

A comprehensive data set of serum markers, histological parameters and transcript profiles was compiled at 8 time points after bile duct ligation (BDL) in mice, comprising different stages of the disease. The data set consists of  $N_r = 5$  repeats ( $N_r = 3$  for CTGF,  $\alpha$ -SMA and S100a4) for  $N_t = 8$  time points denoted by  $t_1, \dots, t_{N_t}$  consisting of a total  $N_f = 153$  measured parameters in the following referred to as factors (Fluidigm gene expression, biochemical markers, and (immuno-)histochemical measurements).

The following naming conventions are used

- **factor** : one of the measured quantities/parameters over time, i.e. either
  - gene expression of a single gene (e.g. Actb);
  - one of the biochemical markers (e.g. ALT, albumin, bilirubin)
  - one of the (immuno-)histochemical markers (e.g. BrdU-positive Kupffer cells, CTGF)
- **time point** : a single value  $t_i$  from the measured time points 0h (control), 6h, 12h, 18h, 30h, 2d, 5d and 14d
- **sample** : one of the  $N_t N_r = 40$  mice, i.e. a one of the repeats for a given time point

The main steps of the analysis comprise

- **Explorative data analysis**
- **Dimension reduction via ANOVA**
- **Correlation analysis**
- **Hierarchical clustering**
- **Decision trees**

The HTML version of this document is available from

<http://matthiaskoenig.github.io/bdl-analysis/>

All data sets, source code and documentation are provided at

<https://github.com/matthiaskoenig/bdl-analysis>

All results of this analysis are written to the results directory defined via the BDL\_RESULTS environment variable. To reproduce this analysis create the respective variable and run the `Koenig_BDL_analysis.Rmd` file.

```
# read results directory from environment variable
resultsPath <- Sys.getenv("BDL_RESULTS")
if (identical(resultsPath, "")){
  stop("No results directory defined, set the BDL_RESULTS environment variable")
}
# create directory to store data sets of analysis
dir.create(file.path(resultsPath, 'data'), showWarnings=FALSE)
```

# Explorative data analysis

## Data import

In a first step the processed data sets are loaded from the `data` folder: These are the time course data for all factors (`BDLdata`), additional information for the factors (`BDLfactors`), the sample definition, i.e. the assignment of sample ids to respective time point and repeat (`BDLsamples`), and a mapping of the Fluidigm (gene) probe ids to UniProt identifiers and names (`BDLprobes`).

```
suppressPackageStartupMessages(library(BDLanalysis))
suppressPackageStartupMessages(library(calibrate))
suppressPackageStartupMessages(library(pander))
dir.create(file.path(resultsPath, 'control'), showWarnings=FALSE)
# path definition
baseLoc <- system.file(package="BDLanalysis")
extPath <- file.path(baseLoc, "extdata")
# load data
data(BDLdata)
data(BDLsamples)
data(BDLfactors)
data(BDLprobes)
# counters
Nr <- 5 # repeats
Nt <- length(levels(BDLsamples$time_fac)) # Nt=8 time points
# store all data sets in the results folder
save(BDLdata, file=file.path(resultsPath, "data", "BDLdata.Rdata"))
save(BDLsamples, file=file.path(resultsPath, "data", "BDLsamples.Rdata"))
save(BDLfactors, file=file.path(resultsPath, "data", "BDLfactors.Rdata"))
save(BDLprobes, file=file.path(resultsPath, "data", "BDLprobes.Rdata"))
```

In addition to the individual sample data, the mean data averaged over the  $N_r$  repeats per time points is used in parts of the analysis. The mean factor data set is calculated once via

```
BDLmean <- bdl_mean_data(BDLdata, BDLsamples)
BDLmean.time <- as.numeric(levels(as.factor(BDLsamples$time)))
```

In total 153 factors were measured in the this BDL study falling in the categories: Biochemistry, GE\_ADME, GE\_Cytokines, GE\_Fibrosis, Histochemistry. The majority of factors belongs hereby to the 3 fluidigm chips with 47 probes per chip (one probe was filtered from GE fibrosis during preprocessing of the chips).

An overview of the number of factors per category is provided in the following table

```
cat_table <- as.data.frame(table(BDLfactors$ftype))
colnames(cat_table) <- c("Category", "Freq")
set.caption(sub(".", " ", "Factors per category", fixed = TRUE))
pander(cat_table)
```

Table 1: Factors per category

| Category     | Freq |
|--------------|------|
| Biochemistry | 4    |
| GE_ADME      | 47   |

| Category       | Freq |
|----------------|------|
| GE_Cytokines   | 47   |
| GE_Fibrosis    | 46   |
| Histochemistry | 9    |

```
rm(cat_table)
```

## Gene Probes

In the following an overview of the gene probes is given providing full names and links to UniProt.

```
# create data frame with probe information
create_probe_df <- function() {
  # get the gene factors
  f_names <- colnames(BDLdata)[BDLfactors$ftype.short == ""]
  # get the probe information
  Nf = length(f_names)
  probe_names <- rep(NA, length=Nf)
  probe_uniprot <- rep(NA, length=Nf)
  probe_genes <- rep(NA, length=Nf)
  names(probe_names) <- f_names
  names(probe_uniprot) <- f_names
  names(probe_genes) <- f_names
  for (name in colnames(BDLdata)){
    probe_info <- ProbeInformation(name)
    if (!is.null(probe_info)){
      if (!is.null(probe_info$Protein.name)){
        probe_names[name] <- probe_info$Protein.name
        probe_uniprot[name] <- probe_info$Entry
        probe_genes[name] <- probe_info$Gene.name
      }
    }
  }
  probe_df <- data.frame(name=probe_names, genes=probe_genes, uniprot=probe_uniprot)
  # sort
  probe_df <- probe_df[order(rownames(probe_df)), ]
  # remove the double Act probes
  probe_df <- probe_df[!(rownames(probe_df) %in% c("Actb.x", "Actb.y")), ]
  return(probe_df)
}
# print probe information
probe_df <- create_probe_df()
```

```
options(width=200)
print(probe_df)
```

|        | name                                   | genes                                   | uniprot |
|--------|----------------------------------------|-----------------------------------------|---------|
| Abcb1a | Multidrug resistance protein 1A        | Abcb1a, Abcb4, Mdr1a, Mdr3, Pgy-3, Pgy3 | P21447  |
| Abcc2  | Canalicular multispecific organic a... | Abcc2                                   | Q8VI47  |
| Abcg2  | ATP-binding cassette sub-family G m... | Abcg2, Abcp, Bcrp1                      | Q7TMS5  |
| Acta2  | Actin, aortic smooth muscle            | Acta2, Actsa, Actvs                     | P62737  |

|         |                                        |                                          |        |
|---------|----------------------------------------|------------------------------------------|--------|
| Actb    | Actin, cytoplasmic 1                   | Actb                                     | P60710 |
| Ahr     | Aryl hydrocarbon receptor              | Ahr                                      | P30561 |
| Bad     | Bcl2-associated agonist of cell dea... | Bad, Bbc6                                | Q61337 |
| Bak1    | Bcl-2 homologous antagonist/killer     | Bak1, Bak                                | O08734 |
| Bax     | Apoptosis regulator BAX                | Bax                                      | Q07813 |
| Bcl2l11 | Bcl-2-like protein 11                  | Bcl2l11, Bim                             | O54918 |
| Birc5   | Baculoviral IAP repeat-containing p... | Birc5, Api4, Iap4                        | O70201 |
| Ccl2    | C-C motif chemokine 2                  | Ccl2, Je, Mcp1, Scya2                    | P10148 |
| Ccl3    | C-C motif chemokine 3                  | Ccl3, Mip1a, Scya3                       | P10855 |
| Ccl4    | C-C motif chemokine 4                  | Ccl4, Mip1b, Scya4                       | P14097 |
| Ccl5    | C-C motif chemokine 5                  | Ccl5, Scya5                              | P30882 |
| Ccl7    | C-C motif chemokine 7                  | Ccl7, Fic, Mcp3, Scya7                   | Q03366 |
| Ccl8    | C-C motif chemokine 8                  | Ccl8, Mcp2, Scya8                        | Q9Z121 |
| Ccr2    | C-C chemokine receptor type 2          | Ccr2, Cmkbr2                             | P51683 |
| Ccr3    | Probable C-C chemokine receptor typ... | Ccr3, Cmkbr112, Cmkbr3                   | P51678 |
| Ccr5    | C-C chemokine receptor type 5          | Ccr5, Cmkbr5                             | P51682 |
| Cd14    | Monocyte differentiation antigen CD... | Cd14                                     | P10810 |
| Cd69    | Early activation antigen CD69          | Cd69                                     | P37217 |
| Cd86    | T-lymphocyte activation antigen CD8... | Cd86                                     | P42082 |
| Cdh1    | Cadherin-1                             | Cdh1                                     | P09803 |
| Cdh2    | Cadherin-2                             | Cdh2                                     | P15116 |
| Cebpa   | CCAAT/enhancer-binding protein alph... | Cebpa, Cebp                              | P53566 |
| Cebpb   | CCAAT/enhancer-binding protein beta    | Cebpb                                    | P28033 |
| Cebpd   | CCAAT/enhancer-binding protein delt... | Cebpd, Crp3                              | Q00322 |
| Ch25h   | Cholesterol 25-hydroxylase             | Ch25h                                    | Q9Z0F5 |
| Col1a1  | Collagen alpha-1(I) chain              | Col1a1, Cola1                            | P11087 |
| Col3a1  | Collagen alpha-1(III) chain            | Col3a1                                   | P08121 |
| Col4a3  | Collagen alpha-3(IV) chain             | Col4a3                                   | Q9QZS0 |
| Col6a6  | Collagen alpha-6(VI) chain             | Col6a6                                   | Q8C6K9 |
| Col8a1  | Collagen alpha-1(VIII) chain           | Col8a1                                   | Q00780 |
| Ctgf    | Connective tissue growth factor        | Ctgf, Ccn2, Fisp-12, Fisp12, Hcs24       | P29268 |
| Cxcl1   | Growth-regulated alpha protein         | Cxcl1, Gro, Gro1, Mgsa, Scyb1            | P12850 |
| Cxcl15  | C-X-C motif chemokine 15               | Cxcl15, Scyb15                           | Q9WVL7 |
| Cxcl2   | C-X-C motif chemokine 2                | Cxcl2, Mip-2, Mip2, Scyb2                | P10889 |
| Cxcl3   | C-X-C motif chemokine 3                | Cxcl3, Dcip1, Gm1960                     | Q6W5C0 |
| Cxcl5   | C-X-C motif chemokine 5                | Cxcl5, Scyb5                             | P50228 |
| Cxcr1   | C-X-C chemokine receptor type 1        | Cxcr1, Il8ra                             | Q810W6 |
| Cxcr2   | C-X-C chemokine receptor type 2        | Cxcr2, Cmkar2, Gpcr16, Il8rb             | P35343 |
| Cyp1a2  | Cytochrome P450 1A2                    | Cyp1a2, Cyp1a-2                          | P00186 |
| Cyp24a1 | 1,25-dihydroxyvitamin D(3) 24-hydro... | Cyp24a1, Cyp-24, Cyp24                   | Q64441 |
| Cyp2b10 | Cytochrome P450 2B10                   | Cyp2b10, Cyp2b-10, Cyp2b20               | P12791 |
| Cyp2c29 | Cytochrome P450 2C29                   | Cyp2c29                                  | Q64458 |
| Cyp2c37 | Cytochrome P450 2C37                   | Cyp2c37                                  | P56654 |
| Cyp2c39 | Cytochrome P450 2C39                   | Cyp2c39                                  | P56656 |
| Cyp2d22 |                                        |                                          |        |
| Cyp2e1  | Cytochrome P450 2E1                    | Cyp2e1, Cyp2e, Cyp2e-1                   | Q05421 |
| Cyp3a11 | Cytochrome P450 3A11                   | Cyp3a11, Cyp3a-11                        | Q64459 |
| Cyp4a10 | Cytochrome P450 4A10                   | Cyp4a10, Cyp4a-10                        | O88833 |
| Cyp7a1  | Cholesterol 7-alpha-monooxygenase      | Cyp7a1, Cyp7                             | Q64505 |
| Dpyd    | Dihydropyrimidine dehydrogenase [NA... | Dpyd                                     | Q8CHR6 |
| Edn1    | Endothelin-1                           | Edn1                                     | P22387 |
| Egf     | Pro-epidermal growth factor            | Egf                                      | P01132 |
| Egfr    | Epidermal growth factor receptor       | Egfr                                     | Q01279 |
| Fas1    | Tumor necrosis factor ligand superf... | Faslg, Apt1lg1, Cd95l, Fas1, gld, Tnfsf6 | P41047 |
| Fn1     | Fibronectin                            | Fn1                                      | P11276 |
| Gdf2    | Growth/differentiation factor 2        | Gdf2, Bmp9                               | Q9WV56 |
| Gsta2   | Glutathione S-transferase A2           | Gsta2                                    | P10648 |
| Gstm1   | Glutathione S-transferase Mu 1         | Gstm1                                    | P10649 |
| Gstp1   | Glutathione S-transferase P 1          | Gstp1, Gstpib                            | P19157 |

|         |                                        |                                     |        |
|---------|----------------------------------------|-------------------------------------|--------|
| Hgf     | Hepatocyte growth factor receptor      | Met                                 | P16056 |
| Hk2     | Hexokinase-2                           | Hk2                                 | 008528 |
| Hmox1   | Heme oxygenase 1                       | Hmox1                               | P14901 |
| Hnf4a   | Hepatocyte nuclear factor 4-alpha      | Hnf4a, Hnf-4, Hnf4, Nr2a1, Tcf14    | P49698 |
| Ifna1   | Interferon alpha-1                     | Ifna1                               | P01572 |
| Ifnar1  | Interferon alpha/beta receptor 1       | Ifnar1, Ifar, Ifnar                 | P33896 |
| Ifnar2  | Interferon alpha/beta receptor 2       | Ifnar2                              | 035664 |
| Ifnb1   | Interferon beta                        | Ifnb1, Ifb, Ifnb                    | P01575 |
| Ifng    | Interferon gamma                       | Ifng                                | P01580 |
| Igf1    | Insulin-like growth factor I           | Igf1, Igf-1                         | P05017 |
| Il10    | Interleukin-10                         | Il10, Il-10                         | P18893 |
| Il10ra  | Interleukin-10 receptor subunit alp... | Il10ra, Il10r                       | Q61727 |
| Il10rb  | Interleukin-10 receptor subunit bet... | Il10rb, Crfb4                       | Q61190 |
| Il13    | Interleukin-13                         | Il13, Il-13                         | P20109 |
| Il17a   | Interleukin-17A                        | Il17a, Ctla8, Il17                  | Q62386 |
| Il1b    | Interleukin-1 beta                     | Il1b                                | P10749 |
| Il1rn   | Interleukin-1 receptor antagonist p... | Il1rn, Il-1ra                       | P25085 |
| Il2     | Interleukin-2                          | Il2, Il-2                           | P04351 |
| Il28b   | Interferon lambda-3                    | Ifnl3, Il28, Il28b                  | Q8CGK6 |
| Il4     | Interleukin-4                          | Il4, Il-4                           | P07750 |
| Il6     | Interleukin-6                          | Il6, Il-6                           | P08505 |
| Il6st   | Interleukin-6 receptor subunit beta    | Il6st                               | Q00560 |
| Lama1   | Laminin subunit alpha-1                | Lama1, Lama, Lama-1                 | P19137 |
| Met     | Hepatocyte growth factor receptor      | Met                                 | P16056 |
| Mki67   | MKI67 FHA domain-interacting nucleo... | Nifk, Mki67ip                       | Q91VE6 |
| Mrc1    | Macrophage mannose receptor 1          | Mrc1                                | Q61830 |
| Nes     | Nestin                                 | Nes                                 | Q6P5H2 |
| Nfkbia  | NF-kappa-B inhibitor alpha             | Nfkbia, Ikba                        | Q9Z1E3 |
| Nos2    | Nitric oxide synthase, inducible       | Nos2, Inos1                         | P29477 |
| Notch1  | Neurogenic locus notch homolog prot... | Notch1, Motch                       | Q01705 |
| Notch3  | Neurogenic locus notch homolog prot... | Notch3                              | Q61982 |
| Nr0b2   | Nuclear receptor subfamily 0 group ... | Nr0b2, Shp                          | Q62227 |
| Nr1h3   | Oxysterols receptor LXR-alpha          | Nr1h3, Lxra                         | Q9Z0Y9 |
| Nr1i2   | Nuclear receptor subfamily 1 group ... | Nr1i2, Pxr                          | 054915 |
| Nr1i3   | Nuclear receptor subfamily 1 group ... | Nr1i3, Car                          | 035627 |
| Nr2f1   | COUP transcription factor 1            | Nr2f1, Erbal3, Tfcoup1              | Q60632 |
| Nr2f2   | COUP transcription factor 2            | Nr2f2, Aporp1, Arp-1, Arp1, Tfcoup2 | P43135 |
| Nr3c1   | Glucocorticoid receptor                | Nr3c1, Gr1, Gr11                    | P06537 |
| Osm     | Oncostatin-M                           | Osm                                 | P53347 |
| Osmr    | Oncostatin-M-specific receptor subu... | Osmr, Osmrb                         | 070458 |
| Pde4a   | cAMP-specific 3',5'-cyclic phosphod... | Pde4a                               | 089084 |
| Pde4b   | cAMP-specific 3',5'-cyclic phosphod... | Pde4a                               | 089084 |
| Pde4d   | cAMP-specific 3',5'-cyclic phosphod... | Pde4d                               | Q01063 |
| Pdgfb   | Platelet-derived growth factor subu... | Pdgfb, Sis                          | P31240 |
| Por     | NADPH--cytochrome P450 reductase       | Por                                 | P37040 |
| Ppara   | Peroxisome proliferator-activated r... | Ppara, Nr1c1, Ppar                  | P23204 |
| Pparg   | Peroxisome proliferator-activated r... | Pparg, Nr1c3                        | P37238 |
| Prom1   | Prominin-1                             | Prom1, Prom, Prom11                 | 054990 |
| Pten    | Phosphatidylinositol 3,4,5-trisphos... | Pten, Mmac1                         | 008586 |
| Ptgs2   | Prostaglandin G/H synthase 2           | Ptgs2, Cox-2, Cox2, Pghs-b, Tis10   | Q05769 |
| Rarres1 | Cytosolic carboxypeptidase 2           | Agbl2, Ccp2                         | Q8CDK2 |
| Rps18   | 40S ribosomal protein S18              | Rps18                               | P62270 |
| Rxra    | Retinoic acid receptor RXR-alpha       | Rxra, Nr2b1                         | P28700 |
| Slc10a1 | Sodium/bile acid cotransporter         | Slc10a1, Ntcp                       | 008705 |
| Smad6   | Mothers against decapentaplegic hom... | Smad6, Madh6, Madh7, Msmad6         | 035182 |
| Smad7   | Mothers against decapentaplegic hom... | Smad7, Madh7, Madh8                 | 035253 |
| Socs1   | Suppressor of cytokine signaling 1     | Socs1, Cish1, Ssi1                  | 035716 |
| Socs3   | Suppressor of cytokine signaling 3     | Socs3, Cis3, Cish3                  | 035718 |
| Sod2    | Superoxide dismutase [Mn], mitochon... | Sod2, Sod-2                         | P09671 |

|          |                                        |                               |        |
|----------|----------------------------------------|-------------------------------|--------|
| Sparc    | SPARC                                  | Sparc                         | P07214 |
| Sult1a1  | Sulfotransferase 1A1                   | Sult1a1, St1a1, Stp, Stp1     | P52840 |
| Sult1b1  | Sulfotransferase family cytosolic 1... | Sult1b1                       | Q9QWG7 |
| Tgfb1    | Transforming growth factor beta-1      | Tgfb1                         | P04202 |
| Tgfb2    | Transforming growth factor beta-2      | Tgfb2                         | P27090 |
| Tgfbr2   | TGF-beta receptor type-2               | Tgfbr2                        | Q62312 |
| Timp1    | Metalloproteinase inhibitor 1          | Timp1, Timp, Timp-1           | P12032 |
| Timp2    | Metalloproteinase inhibitor 2          | Timp2, Timp-2                 | P25785 |
| Tnc      | Tenascin                               | Tnc, Hxb                      | Q80YX1 |
| Tnf      | Tumor necrosis factor                  | Tnf, Tnfa, Tnfsf2             | P06804 |
| Tnfrsf1a | Tumor necrosis factor receptor supe... | Tnfrsf1a, Tnfr-1, Tnfr1       | P25118 |
| Tnfrsf1b | Tumor necrosis factor receptor supe... | Tnfrsf1b, Tnfr-2, Tnfr2       | P25119 |
| Ugt1a1   | UDP-glucuronosyltransferase 1-1        | Ugt1a1, Ugt1                  | Q63886 |
| Vdr      | Vitamin D3 receptor                    | Vdr, Nr1i1                    | P48281 |
| Wispl    | WNT1-inducible-signaling pathway pr... | Wispl, Ccn4, Elm1             | Q54775 |
| Xiap     | E3 ubiquitin-protein ligase XIAP       | Xiap, Aipa, Api3, Birc4, Miha | Q60989 |

```
options(width=75)
```

## Data visualization

### Single chip data

Create heatmap of the mean chip data

```
suppressPackageStartupMessages(library(gplots))
suppressPackageStartupMessages(library(RColorBrewer))

data_ADME = t(as.matrix(BDLmean[BDLfactors$ftype == "GE_ADME"]))
data_ADME <- data_ADME[rownames(data_ADME) != "Actb.x", ]

data_Cytokines = t(as.matrix(BDLmean[BDLfactors$ftype == "GE_Cytokines"]))
data_Cytokines <- data_Cytokines[rownames(data_Cytokines) != "Actb.y", ]

data_Fibrosis = t(as.matrix(BDLmean[BDLfactors$ftype == "GE_Fibrosis"]))
data_Fibrosis <- data_Fibrosis[rownames(data_Fibrosis) != "Actb", ]

# fold changes relative to sham mice (0 h) displayed in log2 scale
log2_to_control <- function(data){
  data <- data[sort(rownames(data)), ] # sort by name
  reldata <- data[, 2:ncol(data)]/data[, 1]
  log2_reldata <- log2(reldata)
}

data_list <- list(ADME=data_ADME,
                 Fibrosis=data_Fibrosis,
                 Cytokines=data_Cytokines)
for (name in names(data_list)){
  data <- data_list[[name]]
  cor_colors <- HeatmapColors() # color palette for correlation (red - white - blue)
  hmap_colors <- cor_colors(100)
  # plot to file
  pdf(file.path(resultsPath, "control", paste("chip_heatmap_", name, ".pdf", sep="")),
      width=8, height=10, pointsize=12)
```

```

heatmap.2(log2_to_control(data), col=hmap_colors, breaks=seq(from=-2, to=2, length.out=length(hmap_co
scale="none",
key=TRUE, symkey=FALSE, key.xlab = "log2",
trace="none", cexRow=0.8, cexCol=0.8,
symm=FALSE,
density.info="none", dendrogram="none",
Rowv=NULL, Colv=NULL,
keysize=0.8,
sepwidth=c(0.01,0.01),
sepcolor="white")
invisible(dev.off())
}

```

### Time course of single factors

To get an overview over the BDL data set plots of the raw and mean data for all individual factors over time were generated. These are available in the `resultsPath/factors` folder under the respective names of the factors

```

# Create figures for all factors
factors_path <- file.path(resultsPath, 'factors')
dir.create(factors_path, showWarnings=FALSE)
plot_all_factors(path=factors_path)
rm(factors_path)

```

An example plot for a single factor is depicted for `bilirubin`. A continuous increase in bilirubin can be observed after BDL.

```
plot_single_factor('bilirubin', path=NULL)
```

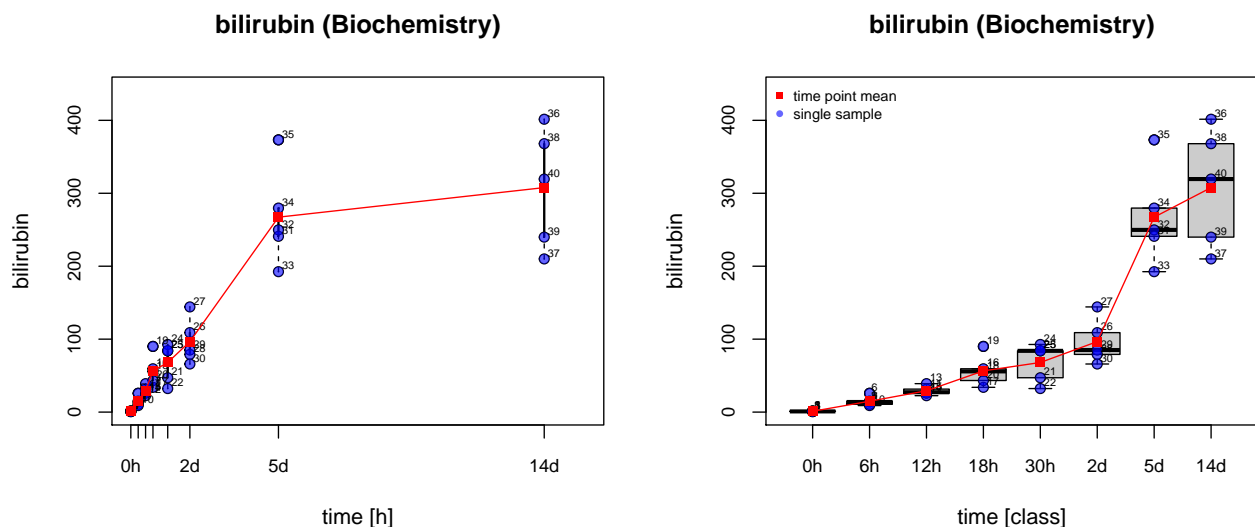

Figure: Bilirubin timecourse. Plot of the raw time course data for bilirubin. On the left the data is plotted against the time [h], on the right against the different time classes. Individual data points are depicted in blue with the respective sample number shown next to the data points. The mean averaged of the repeats per time point are depicted in red.



## Time course of all factors

Next the heatmap overview of the complete data set is generated, i.e. the data of all factors for of all time points and repeats. This provides a first overview over the complete data set.

```
# define horizontal and vertical helper lines
v_lines <- ((1:Nt)*Nr+0.5)
factor_types <- c("Histochemistry", "Biochemistry",
                 "GE_Fibrosis", "GE_Cytokines", "GE_ADME")
factor_table <- table(BDLfactors$type)
h_lines <- 0.5 + cumsum(factor_table[factor_types])

timecourse_heatmap <- function(){
  # create better row names
  dtmp <- BDLdata
  rownames(dtmp) <- paste(rownames(BDLsamples), BDLsamples$time_fac, sep=" ")
  # heatmap colors
  hmap_colors <- HeatmapColors()
  # colors for factor groups
  colorset <- brewer.pal(length(factor_types), "Set2")
  color.map <- function(factor_id) {
    return(
      colorset[which(factor_types==BDLfactors$type[which(BDLfactors$id==factor_id)])]
    )
  }
  factorColors <- unlist(lapply(BDLfactors$id, color.map))
  # heatmap
  heatmap.2(t(as.matrix(dtmp)), col=hmap_colors(100), scale="row",
            dendrogram="none", Rowv=NULL, Colv=NULL,
            key=TRUE, trace="none", cexRow=0.5, keysize=0.8, density.info="none",
            RowSideColors=factorColors,
            add.expr=abline(v=v_lines, h=h_lines, col="black", lwd=0.5),
            main="Heatmap of BDL time course data")
  # xlab="sample", ylab="factor"

  # legend
  legend("left",
        inset=c(-0.03,0),
        legend = rev(factor_types), # category labels
        col = rev(colorset), # color key
        lty= 1, lwd = 10, cex = 0.7, bty="n"
        )
}

# plot to file
pdf(file.path(resultsPath, "control", "timecourse_heatmap.pdf"),
    width=10, height=10, pointsize=12)
timecourse_heatmap()
invisible(dev.off())

timecourse_heatmap()
```

Color Key

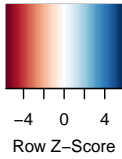

Heatmap of BDL time course data

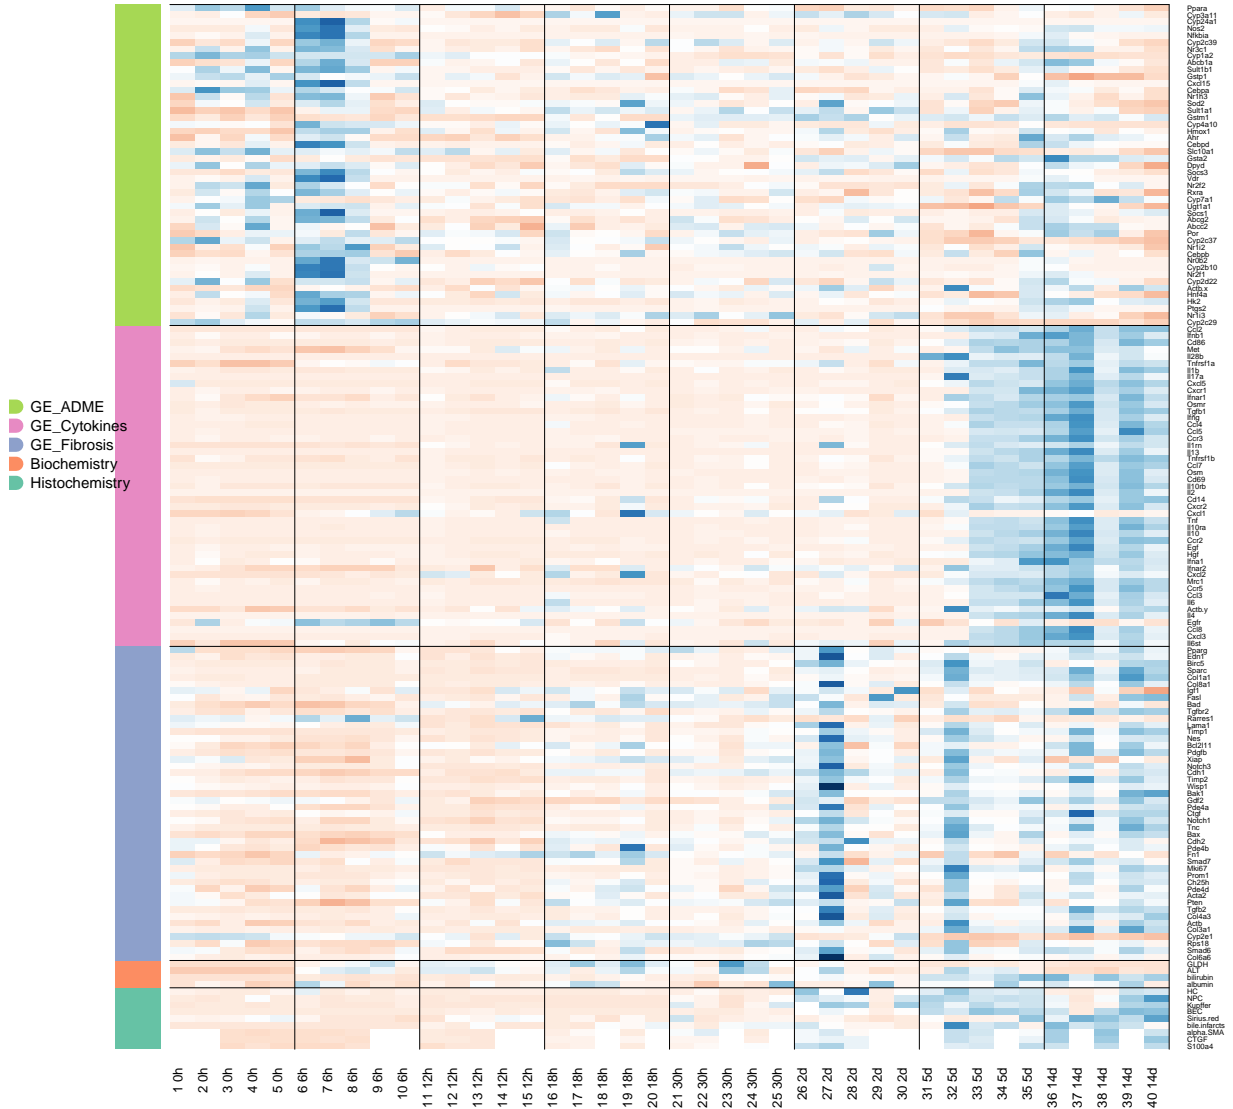

Figure: Timecourse heatmap of all factors. Rows correspond to individual factors, with factor order corresponding to the original data set: GE\_ADME, GE\_Cytokines, GE\_Fibrosis, Biochemistry, Histochemistry. Columns correspond to the 40 samples with 5 subsequent samples belonging to one of the 8 time points. The data is row scaled, i.e. every individual factor is scaled to have mean zero and standard deviation one.

**Results:** Various patterns are visible in the plotted raw data set:

- **Two main classes of time course response are observed.** One class with an increase in the early phase up to 6h after BDL (many of the ADME genes fall in this class) and a second class increasing in the later stage after 2-5 days after BDL. Many of the genes on the Cytokines and Fibrosis chips as well as some of the biochemical and (immuno-)histochemical factors fall in this second class.
- **The individual animals show heterogeneous responses to BDL.** Within one time point the 5 repeats can show very different patterns. For instance at time 6h after BDL 3/5 of the mice show

a marked increase in the ADME genes, whereas 2/5 do not show such a marked increase. Another example is the mice sample 27 at time 2d, with a high increase in the genes on the Fibrosis chip, which is not observed in the other 4 samples at time 2d.

## Actb quality control

Actb (Actin, cytoplasmic 1) probes were included on all Fluidigm chips (GE\_ADME, GE\_Cytokines, GE\_Fibrosis) and not used in the normalization of the transcription data. Hence, ActB can serve as quality control for the technical reproducibility of the Fluidigm chips. If the data is reproducible between chips the pairwise correlation between all individual Actb measurements should have high correlation coefficients close to 1. Plotting the data of the Actb measurements of two chips against each other should lie on a straight line.

```
# Actb control figure
plot_actb_control <- function(){
  par(mfrow=c(2,3))
  plot_single("Actb")
  plot_single("Actb.x")
  plot_single("Actb.y")
  plot_cor_pair("Actb", "Actb.x", single_plots=FALSE)
  plot_cor_pair("Actb", "Actb.y", single_plots=FALSE)
  plot_cor_pair("Actb.x", "Actb.y", single_plots=FALSE)
  par(mfrow=c(1,1))
}

# plot to file
pdf(file.path(resultsPath, "control", "Actb_control.pdf"),
    width=10, height=6, pointsize=12)
plot_actb_control()
invisible(dev.off())

# calculate Spearman and Pearson correlation coefficients on N=8*5=40 data points
actb.spearman <- cor(data.frame(Actb=BDLdata$Actb,
                               Actb.x=BDLdata$Actb.x,
                               Actb.y=BDLdata$Actb.y), method="spearman")
actb.pearson <- cor(data.frame(Actb=BDLdata$Actb,
                               Actb.x=BDLdata$Actb.x,
                               Actb.y=BDLdata$Actb.y), method="pearson")

# table of correlation coefficients
set.caption(sub(".", " ", "Spearman correlation of Actb controls", fixed = TRUE))
pander(round(actb.spearman, digits=3))
```

Table 2: Spearman correlation of Actb controls

|        | Actb  | Actb.x | Actb.y |
|--------|-------|--------|--------|
| Actb   | 1     | 0.908  | 0.944  |
| Actb.x | 0.908 | 1      | 0.917  |
| Actb.y | 0.944 | 0.917  | 1      |

```
set.caption(sub(".", " ", "Pearson correlation of Actb controls", fixed = TRUE))
pander(round(actb.pearson, digits=3))
```

Table 3: Pearson correlation of Actb controls

|        | Actb  | Actb.x | Actb.y |
|--------|-------|--------|--------|
| Actb   | 1     | 0.945  | 0.938  |
| Actb.x | 0.945 | 1      | 0.935  |
| Actb.y | 0.938 | 0.935  | 1      |

```
plot_actb_control()
```

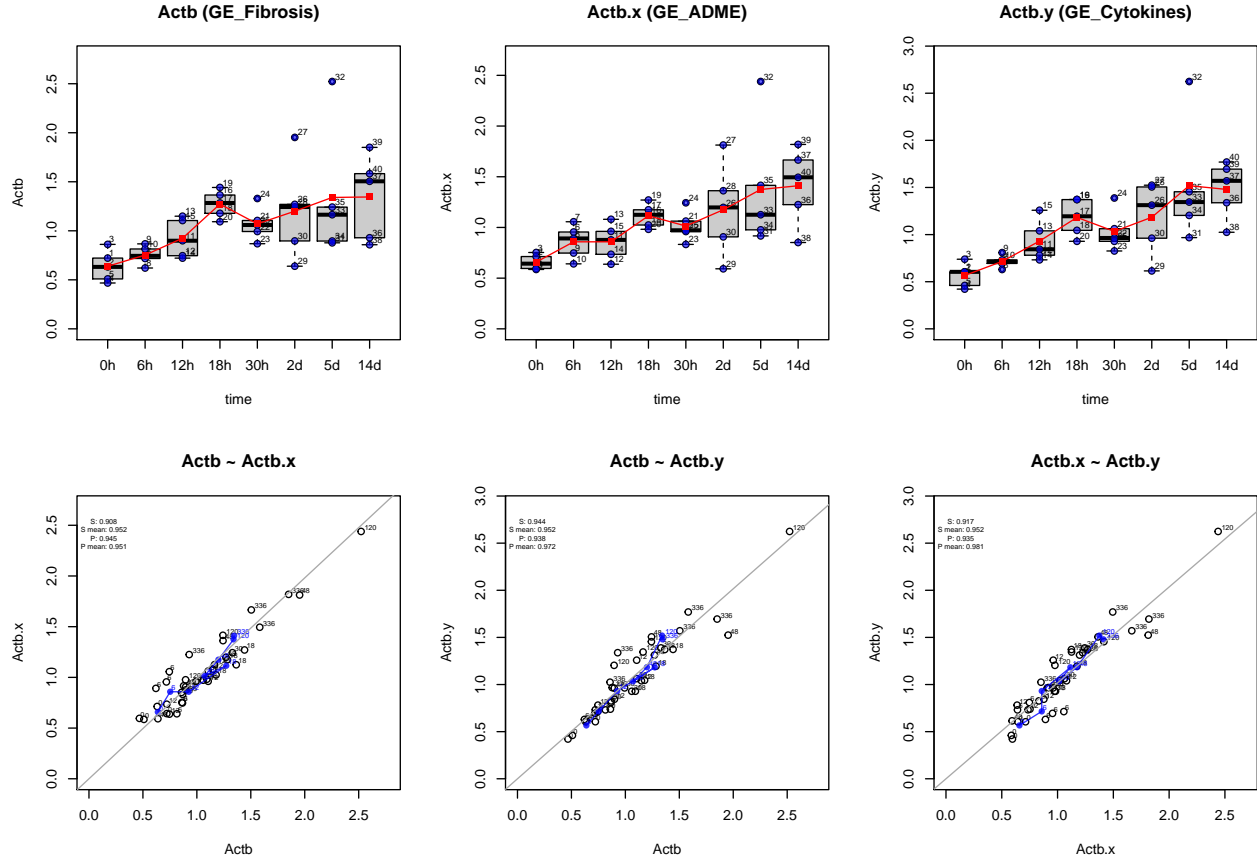

Figure: Actb control. Correlation plot of the Actb probes from the 3 Fluidigm chips: Actb (fibrosis), Actb.x (ADME), Actb.y (Cytokines). The top row shows the individual time courses, the bottom row the pair wise plot of individual data points.

**Results:** The Actb Fluidigm gene expression measurements are highly reproducible for the measured chips, with Spearman as well as Pearson correlation coefficients all  $> 0.9$  for pairwise Actb comparison.

## Dimension reduction

A one-way analysis of variance (ANOVA) was applied to reduce the factors to the subset showing significant ( $p_{adj} < 0.05$ ) changes during the time course. In its simplest form, ANOVA provides a statistical test of whether or not the means of several groups are equal, and therefore generalizes the t-test to more than two groups, with the groups being the sampled time points. The Holm's procedure was used to correct the p-values for any artificial p-value inflation due to multiple testing.

In a first step, an ANOVA was calculated with the groups corresponding to the different time points for every factor in the BDL data set. Dimension reduction was then performed by filtering out those factors which did not significantly change over time.

The BDLdata data set is reshaped into matrix format for the ANOVA calculation, with time points in rows and repeats as columns for every factor.

```
BDLmatrices <- bdl_matrix_data(BDLdata, BDLsamples)
```

## ANOVA for single factor

The following shows the ANOVA calculation for a single factor. We use again the example bilirubin to demonstrate the method.

```
# example ANOVA for one factor
mat.anova <- t(BDLmatrices[['bilirubin']])
colnames(mat.anova) <- levels(BDLsamples$time_fac)
print(mat.anova)
```

```
      0h   6h  12h  18h  30h   2d   5d  14d
R1 1.49 25.80 31.51 59.40 47.11 108.95 241.0 401.5
R2 0.93 13.87 22.51 33.95 32.26 144.20 249.8 210.0
R3 1.65 10.70 38.99 55.80 83.98  79.10 192.5 368.0
R4 0.85 15.08 25.81 90.05 92.72  85.10 279.7 239.9
R5 0.53  8.96 27.21 43.30 84.02  65.95 373.2 319.5
```

```
# concatenate the data rows of dfl into a single vector r .
r = c(t(as.matrix(mat.anova))) # response data

# assign new variables for the treatment levels and number of observations.
f = levels(BDLsamples$time_fac) # treatment levels
k = Nt # number of treatment levels (time points Nt=8)
n = Nr # observations per treatment (repeats Nr=5)

# vector of treatment factors that corresponds to each element of r
# in step 3 with the gl function.
tm <- gl(k, 1, n*k, factor(f)) # matching treatments

# apply the function aov to a formula that describes the response r
# by the treatment factor tm (fit ANOVA model)
av <- aov(r ~ tm)

# print ANOVA summary
summary(av)
```

```
      Df Sum Sq Mean Sq F value    Pr(>F)
tm      7 479470   68496     41 3.27e-14 ***
Residuals 32  53463    1671
---
Signif. codes:  0 '***' 0.001 '**' 0.01 '*' 0.05 '.' 0.1 ' ' 1
```

```
# print p-value
p.value <- summary(av)[[1]][["Pr(>F)"]][[1]]
```

**Results:** The time course of bilirubin is highly altered after BDL, resulting in a high significance of the ANOVA. This confirms what we saw in the initial visual inspection of bilirubin (see Figure above).

## ANOVA for all factors

The ANOVA calculation for all individual factors is performed analog to the calculate for bilirubin. As a consequence of the large number of factors, a multitude of tests are performed, namely an ANOVA for every single factor. Consequently, the reported p-values of the ANOVA have to be adjusted for multiple testing. This is done using the `p.adjust` function which given a set of p-values, returns p-values adjusted using one of several methods. We selected the Holm's method designed to give strong control of the family-wise error rate (Holm, S. (1979). *A simple sequentially rejective multiple test procedure. Scandinavian Journal of Statistics* 6, 65-70.).

```
# Calculation of ANOVA for all factors
df.anova <- all_factor_anova()
df.anova$sig <- sapply(df.anova$p.value, significant_code) # add significant codes

df.anova$p.holm <- p.adjust(df.anova$p.value, method = "holm",
                           n = length(df.anova$p.value))
df.anova$sig.holm <- sapply(df.anova$p.holm, significant_code)
df.anova$ftype <- BDLfactors$ftype
df.anova$fshort <- BDLfactors$ftype.short

# order factors by adjusted p-values, and cleanup for printing
df.anova.ordered <- df.anova[with(df.anova, order(p.holm)), ]
rownames(df.anova.ordered) <- df.anova.ordered$factors
df.anova.ordered <- df.anova.ordered[c("p.holm", "sig.holm", "ftype", "fshort")]
df.anova.ordered$p.holm <- as.numeric(sprintf("%1.2E", df.anova.ordered$p.holm))

# save results
write.table(df.anova.ordered, file=file.path(resultsPath, "data", 'BDLanova.csv'),
           sep="\t", quote=FALSE)
save(df.anova, file=file.path(resultsPath, "data", "BDLanova.Rdata"))
```

```
print(df.anova.ordered)
```

|           | p.holm   | sig.holm | ftype          | fshort |
|-----------|----------|----------|----------------|--------|
| Cyp1a2    | 2.93e-14 | ***      | GE_ADME        |        |
| bilirubin | 4.98e-12 | ***      | Biochemistry   | B      |
| Il10rb    | 1.15e-11 | ***      | GE_Cytokines   |        |
| Tgfb1     | 3.30e-11 | ***      | GE_Cytokines   |        |
| Ccl2      | 3.46e-11 | ***      | GE_Cytokines   |        |
| Cd86      | 6.56e-11 | ***      | GE_Cytokines   |        |
| Ccr2      | 6.94e-11 | ***      | GE_Cytokines   |        |
| Mrc1      | 6.95e-11 | ***      | GE_Cytokines   |        |
| Tnfrsf1b  | 7.89e-11 | ***      | GE_Cytokines   |        |
| Cxcl5     | 6.26e-10 | ***      | GE_Cytokines   |        |
| CTGF      | 7.82e-10 | ***      | Histochemistry | H      |
| Il10ra    | 1.64e-09 | ***      | GE_Cytokines   |        |
| Gstm1     | 9.18e-09 | ***      | GE_ADME        |        |

|            |          |     |                |   |
|------------|----------|-----|----------------|---|
| Ccl7       | 3.40e-08 | *** | GE_Cytokines   |   |
| Ccr5       | 4.36e-08 | *** | GE_Cytokines   |   |
| Hgf        | 5.80e-08 | *** | GE_Cytokines   |   |
| Osmr       | 1.01e-07 | *** | GE_Cytokines   |   |
| Ccl4       | 1.04e-07 | *** | GE_Cytokines   |   |
| Nr0b2      | 1.30e-07 | *** | GE_ADME        |   |
| Tgfbr2     | 1.71e-07 | *** | GE_Fibrosis    |   |
| BEC        | 2.09e-07 | *** | Histochemistry | H |
| Ccl5       | 2.78e-07 | *** | GE_Cytokines   |   |
| Col1a1     | 4.40e-07 | *** | GE_Fibrosis    |   |
| Ifnar1     | 7.71e-07 | *** | GE_Cytokines   |   |
| S100a4     | 9.19e-07 | *** | Histochemistry | H |
| Sparc      | 1.07e-06 | *** | GE_Fibrosis    |   |
| Cyp2e1     | 1.50e-06 | *** | GE_Fibrosis    |   |
| Cxcr2      | 1.75e-06 | *** | GE_Cytokines   |   |
| Ccr3       | 1.91e-06 | *** | GE_Cytokines   |   |
| Cd69       | 2.73e-06 | *** | GE_Cytokines   |   |
| Cyp2c29    | 2.93e-06 | *** | GE_ADME        |   |
| Gsta2      | 3.88e-06 | *** | GE_ADME        |   |
| Tnf        | 4.36e-06 | *** | GE_Cytokines   |   |
| Gdf2       | 5.95e-06 | *** | GE_Fibrosis    |   |
| Il1b       | 7.29e-06 | *** | GE_Cytokines   |   |
| Ifng       | 7.51e-06 | *** | GE_Cytokines   |   |
| Osm        | 7.51e-06 | *** | GE_Cytokines   |   |
| Ccl3       | 8.53e-06 | *** | GE_Cytokines   |   |
| Il13       | 9.29e-06 | *** | GE_Cytokines   |   |
| Cxcr1      | 1.07e-05 | *** | GE_Cytokines   |   |
| Cyp2c37    | 1.09e-05 | *** | GE_ADME        |   |
| Cd14       | 1.15e-05 | *** | GE_Cytokines   |   |
| Col3a1     | 2.02e-05 | *** | GE_Fibrosis    |   |
| Tnfrsf1a   | 3.33e-05 | *** | GE_Cytokines   |   |
| Il2        | 4.84e-05 | *** | GE_Cytokines   |   |
| Ifnb1      | 4.86e-05 | *** | GE_Cytokines   |   |
| Egf        | 4.88e-05 | *** | GE_Cytokines   |   |
| Il28b      | 4.88e-05 | *** | GE_Cytokines   |   |
| Il10       | 4.88e-05 | *** | GE_Cytokines   |   |
| Il4        | 4.88e-05 | *** | GE_Cytokines   |   |
| Slc10a1    | 5.26e-05 | *** | GE_ADME        |   |
| Timp2      | 6.24e-05 | *** | GE_Fibrosis    |   |
| Cxcl3      | 6.82e-05 | *** | GE_Cytokines   |   |
| Ccl8       | 1.23e-04 | *** | GE_Cytokines   |   |
| Ctgf       | 1.32e-04 | *** | GE_Fibrosis    |   |
| Gstp1      | 1.38e-04 | *** | GE_ADME        |   |
| Ppara      | 1.63e-04 | *** | GE_ADME        |   |
| Ifnar2     | 1.82e-04 | *** | GE_Cytokines   |   |
| Il6        | 2.23e-04 | *** | GE_Cytokines   |   |
| Il17a      | 2.43e-04 | *** | GE_Cytokines   |   |
| Bad        | 3.84e-04 | *** | GE_Fibrosis    |   |
| Timp1      | 4.30e-04 | *** | GE_Fibrosis    |   |
| Cdh1       | 4.48e-04 | *** | GE_Fibrosis    |   |
| Cebpa      | 4.93e-04 | *** | GE_ADME        |   |
| alpha.SMA  | 5.02e-04 | *** | Histochemistry | H |
| NPC        | 5.28e-04 | *** | Histochemistry | H |
| Cdh2       | 5.38e-04 | *** | GE_Fibrosis    |   |
| Sirius.red | 7.59e-04 | *** | Histochemistry | H |
| Pdgfb      | 7.68e-04 | *** | GE_Fibrosis    |   |
| Il6st      | 8.71e-04 | *** | GE_Cytokines   |   |
| Fn1        | 1.21e-03 | **  | GE_Fibrosis    |   |
| Mki67      | 1.46e-03 | **  | GE_Fibrosis    |   |

|               |          |    |                |   |
|---------------|----------|----|----------------|---|
| Ifna1         | 1.46e-03 | ** | GE_Cytokines   |   |
| Egfr          | 1.59e-03 | ** | GE_Cytokines   |   |
| Kupffer       | 1.95e-03 | ** | Histochemistry | H |
| Tnc           | 2.04e-03 | ** | GE_Fibrosis    |   |
| Ugt1a1        | 2.75e-03 | ** | GE_ADME        |   |
| Sult1a1       | 2.98e-03 | ** | GE_ADME        |   |
| GLDH          | 4.28e-03 | ** | Biochemistry   | B |
| Notch1        | 4.45e-03 | ** | GE_Fibrosis    |   |
| Met           | 4.97e-03 | ** | GE_Cytokines   |   |
| Cyp7a1        | 9.83e-03 | ** | GE_ADME        |   |
| Cyp24a1       | 9.88e-03 | ** | GE_ADME        |   |
| Tgfb2         | 1.08e-02 | *  | GE_Fibrosis    |   |
| Birc5         | 1.69e-02 | *  | GE_Fibrosis    |   |
| Actb.y        | 1.91e-02 | *  | GE_Cytokines   |   |
| Bak1          | 2.73e-02 | *  | GE_Fibrosis    |   |
| Bax           | 2.89e-02 | *  | GE_Fibrosis    |   |
| Rarres1       | 3.57e-02 | *  | GE_Fibrosis    |   |
| bile.infarcts | 3.78e-02 | *  | Histochemistry | H |
| Cyp3a11       | 5.30e-02 | .  | GE_ADME        |   |
| Sult1b1       | 5.74e-02 | .  | GE_ADME        |   |
| Cyp4a10       | 6.79e-02 | .  | GE_ADME        |   |
| Pparg         | 6.79e-02 | .  | GE_Fibrosis    |   |
| Hk2           | 7.50e-02 | .  | GE_ADME        |   |
| ALT           | 8.79e-02 | .  | Biochemistry   | B |
| Smad6         | 9.49e-02 | .  | GE_Fibrosis    |   |
| Cyp2b10       | 1.17e-01 | .  | GE_ADME        |   |
| HC            | 1.27e-01 |    | Histochemistry | H |
| Il1rn         | 1.35e-01 |    | GE_Cytokines   |   |
| Nes           | 1.37e-01 |    | GE_Fibrosis    |   |
| Nfkbia        | 1.57e-01 |    | GE_ADME        |   |
| Rps18         | 1.68e-01 |    | GE_Fibrosis    |   |
| Cxcl15        | 2.18e-01 |    | GE_ADME        |   |
| Socs3         | 2.43e-01 |    | GE_ADME        |   |
| Vdr           | 2.43e-01 |    | GE_ADME        |   |
| Edn1          | 2.43e-01 |    | GE_Fibrosis    |   |
| Nr2f1         | 2.63e-01 |    | GE_ADME        |   |
| Abcg2         | 2.82e-01 |    | GE_ADME        |   |
| Nr1i3         | 2.82e-01 |    | GE_ADME        |   |
| Hnf4a         | 2.88e-01 |    | GE_ADME        |   |
| Ptgs2         | 3.43e-01 |    | GE_ADME        |   |
| Bcl2l11       | 3.43e-01 |    | GE_Fibrosis    |   |
| Socs1         | 3.46e-01 |    | GE_ADME        |   |
| Pten          | 3.66e-01 |    | GE_Fibrosis    |   |
| Actb.x        | 3.90e-01 |    | GE_ADME        |   |
| Cxcl2         | 4.06e-01 |    | GE_Cytokines   |   |
| Xiap          | 4.06e-01 |    | GE_Fibrosis    |   |
| Pde4a         | 4.42e-01 |    | GE_Fibrosis    |   |
| Dpyd          | 4.43e-01 |    | GE_ADME        |   |
| Cxcl1         | 4.43e-01 |    | GE_Cytokines   |   |
| Lama1         | 4.57e-01 |    | GE_Fibrosis    |   |
| Col8a1        | 5.07e-01 |    | GE_Fibrosis    |   |
| Prom1         | 5.54e-01 |    | GE_Fibrosis    |   |
| Actb          | 5.54e-01 |    | GE_Fibrosis    |   |
| Ahr           | 5.57e-01 |    | GE_ADME        |   |
| Nr2f2         | 5.57e-01 |    | GE_ADME        |   |
| Nos2          | 5.82e-01 |    | GE_ADME        |   |
| Notch3        | 7.26e-01 |    | GE_Fibrosis    |   |
| Cebpd         | 7.29e-01 |    | GE_ADME        |   |
| Hmox1         | 7.69e-01 |    | GE_ADME        |   |



|         |          |              |   |
|---------|----------|--------------|---|
| Cyp2d22 | 8.36e-01 | GE_ADME      |   |
| Igf1    | 9.78e-01 | GE_Fibrosis  |   |
| Fas1    | 9.78e-01 | GE_Fibrosis  |   |
| Cyp2c39 | 1.00e+00 | GE_ADME      |   |
| Nr3c1   | 1.00e+00 | GE_ADME      |   |
| Abcb1a  | 1.00e+00 | GE_ADME      |   |
| Nr1h3   | 1.00e+00 | GE_ADME      |   |
| Sod2    | 1.00e+00 | GE_ADME      |   |
| Rxra    | 1.00e+00 | GE_ADME      |   |
| Abcc2   | 1.00e+00 | GE_ADME      |   |
| Por     | 1.00e+00 | GE_ADME      |   |
| Nr1i2   | 1.00e+00 | GE_ADME      |   |
| Cebpb   | 1.00e+00 | GE_ADME      |   |
| Wisp1   | 1.00e+00 | GE_Fibrosis  |   |
| Pde4b   | 1.00e+00 | GE_Fibrosis  |   |
| Smad7   | 1.00e+00 | GE_Fibrosis  |   |
| Ch25h   | 1.00e+00 | GE_Fibrosis  |   |
| Pde4d   | 1.00e+00 | GE_Fibrosis  |   |
| Acta2   | 1.00e+00 | GE_Fibrosis  |   |
| Col4a3  | 1.00e+00 | GE_Fibrosis  |   |
| Col6a6  | 1.00e+00 | GE_Fibrosis  |   |
| albumin | 1.00e+00 | Biochemistry | B |

## Filter factors

The factors are now filtered based on the respective acceptance level of the ANOVA, with the cutoff for the adjusted p-value, i.e. all factors with a ANOVA with  $p_{adj} \geq p_{accept}$  are filtered out. The filtered raw data is available as `BDLdata.fil`, the filtered mean data is stored as `BDLmean.fil`.

```
p.accept = 0.05 # acceptance level
anova.accept = (df.anova$p.holm < p.accept) # accepted subset
# subset of filtered data
BDLdata.fil <- BDLdata[, anova.accept]
BDLmean.fil <- BDLdata[, anova.accept]

# accepted
table(anova.accept) # 64 rejected / 90 accepted (adjusted)
```

```
anova.accept
FALSE TRUE
  63    90
```

```
# which factors are accepted in which category
fil_tab <- data.frame(
  table(BDLfactors$ftype[anova.accept]),
  table(BDLfactors$ftype),
  round(table(BDLfactors$ftype[anova.accept])/table(BDLfactors$ftype), 2)
)
fil_tab <- fil_tab[, c('Var1', 'Freq', 'Freq.1', 'Freq.2')]
names(fil_tab) <- c('Category', 'Accepted', 'All', 'Percent')
# overview of filtered factors
print(fil_tab)
```

Category Accepted All Percent

|   |                |    |    |      |
|---|----------------|----|----|------|
| 1 | Biochemistry   | 2  | 4  | 0.50 |
| 2 | GE_ADME        | 14 | 47 | 0.30 |
| 3 | GE_Cytokines   | 44 | 47 | 0.94 |
| 4 | GE_Fibrosis    | 22 | 46 | 0.48 |
| 5 | Histochemistry | 8  | 9  | 0.89 |

```
rm(fil_tab)
```

**Results:** Based on the adjusted p-values the data set was reduced from original 153 factors to 90. Almost all Cytokines genes (inflammation panel) were retained in the data set whereas many of the ADME and Fibrosis genes are filtered. All subsequent analyses are performed on the filtered data set, which is depicted in the following heatmap.

### Heatmap of filtered time course data

We now plot the heatmap of time courses only for the subset of filtered factors.

```
# vertical time separators
v_lines <- ((1:Nt)*Nr+0.5)

timecourse_heatmap_filtered <- function(){
  # prepare data with row names
  dtmp <- BDLdata.fil
  rownames(dtmp) <- paste(rownames(BDLsamples), BDLsamples$time_fac, sep=" ")

  # color definitions
  hmap_colors <- HeatmapColors()
  colorset <- brewer.pal(length(factor_types), "Set2")
  color.map <- function(factor_id) {
    return(
      colorset[which(factor_types==BDLfactors$fctype[which(BDLfactors$id==factor_id)]]
    )}
  factorColors <- unlist(lapply(colnames(BDLdata.fil), color.map))
  # heatmap
  heatmap.2(t(as.matrix(dtmp)), col=hmap_colors(100), scale="row", dendrogram="none",
    Rowv=NULL, Colv=NULL,
    key=TRUE, trace="none", cexRow=0.5, keysize=0.8, density.info="none",
    RowSideColors=factorColors,
    add.expr=abline(v=v_lines, col="black", lwd=0.5),
    main="ANOVA Filtered BDL factors")
  # xlab="sample", ylab="factor")

  # legend
  legend("left",
    inset=c(-0.03,0),
    legend = rev(factor_types), # category labels
    col = rev(colorset), # color key
    lty= 1, # line style
    lwd = 10, # line width
    cex = 0.7,
    bty="n"
  )
}
```

```
# plot to file
pdf(file.path(resultsPath, "control", "timecourse_heatmap_filtered.pdf"),
    width=10, height=10, pointsize=12)
timecourse_heatmap_filtered()
invisible(dev.off())
```

```
# plot to report
timecourse_heatmap_filtered()
```

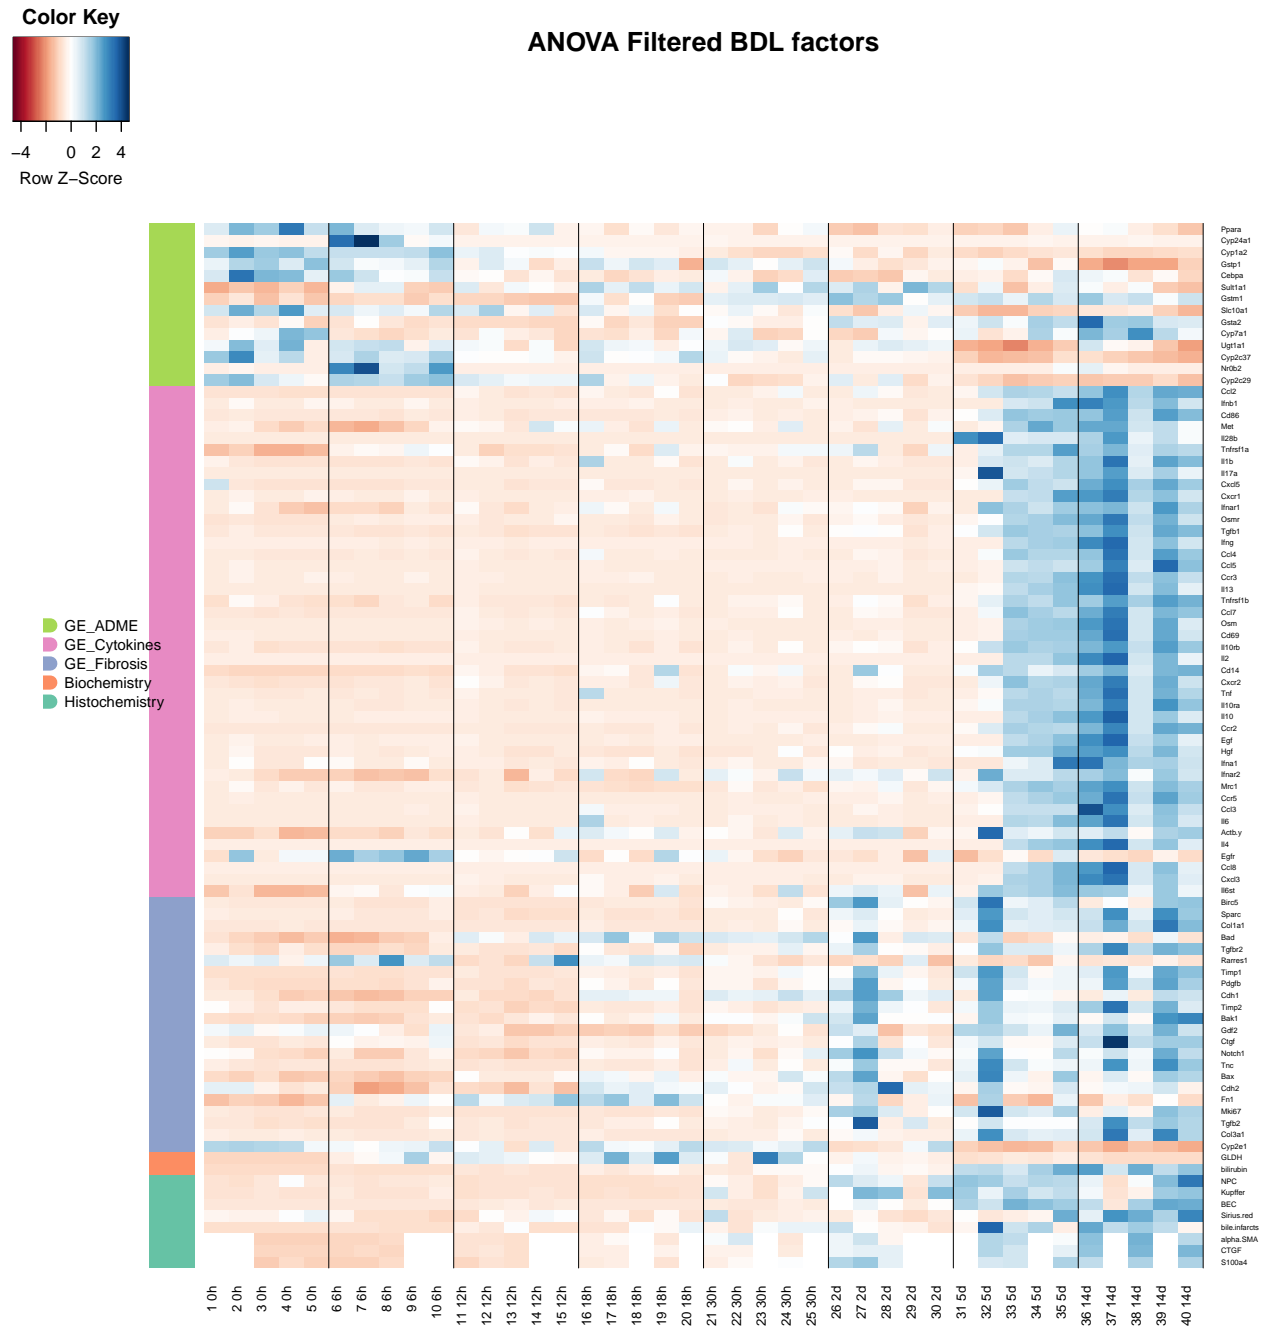

Figure: Filtered timecourse data. Plot of ANOVA filtered data set with processing analog to Figure above.

## t-test for initial phase

We were in addition interested in the factors changed only in the initial phase, i.e. between control and the 6h time point. Therefore, a t-test was performed to find significantly changed factors in the initial phase after BDL.

```
# t-test for the initial phase changes
calculate_initial_phase_changes <- function(){
  # init vectors
  p.t_test <- rep(NA, ncol(BDLdata))
  names(p.t_test) <- colnames(BDLdata)
  up_down <- rep(NA, ncol(BDLdata))
  names(up_down) <- colnames(BDLdata)

  for (name in colnames(BDLdata)){
    # data for control (0h) and initial response (6h)
    d0 <- BDLdata[BDLsamples$time_fac == "0h", name]
    d6 <- BDLdata[BDLsamples$time_fac == "6h", name]
    # remove NA (for immunostainings Nr=3)
    d0 <- d0[!is.na(d0)]
    d6 <- d6[!is.na(d6)]
    # unpaired two.sided t-test
    t.test.res <- t.test(d0, d6, alternative="two.sided", var.equal=FALSE)
    p.t_test[name] <- t.test.res$p.value
    # going up or down
    up_down[name] <- "-"
    if (mean(d6) > mean(d0)){
      up_down[name] <- "up"
    } else if (mean(d6) < mean(d0)){
      up_down[name] <- "down"
    }
  }
}

# data.frame for t-test results
p.df <- data.frame(p.value=p.t_test, up_down=up_down)
p.df$sig <- sapply(p.df$p.value, significant_code)
rownames(p.df) <- colnames(BDLdata)

# sort by p.value
p.df.ordered <- p.df[order(p.df$p.value),]

return(p.df.ordered)
}

# top up and down regulated in initial phase
p.df.ordered <- calculate_initial_phase_changes()
p.df.up <- p.df.ordered[p.df.ordered$p.value<0.05 & p.df.ordered$up_down=="up", ]
p.df.down <- p.df.ordered[p.df.ordered$p.value<0.05 & p.df.ordered$up_down=="down", ]
```

The top up- and down-regulated factors in the initial phase (independent from the ANOVA analysis, i.e. of all factors in data set) are

```
# top up
print(p.df.up)
```

|           | p.value      | up_down | sig |
|-----------|--------------|---------|-----|
| Tnfrsf1a  | 2.418075e-05 | up      | *** |
| Il6st     | 4.777944e-04 | up      | *** |
| Osmr      | 5.635117e-04 | up      | *** |
| Fn1       | 2.057930e-03 | up      | **  |
| Cd14      | 4.500421e-03 | up      | **  |
| ALT       | 5.488831e-03 | up      | **  |
| bilirubin | 9.221295e-03 | up      | **  |
| Nr0b2     | 9.693272e-03 | up      | **  |
| Ctgf      | 1.026407e-02 | up      | *   |
| Cxcl1     | 1.159292e-02 | up      | *   |
| Timp1     | 1.196340e-02 | up      | *   |
| Egfr      | 1.444607e-02 | up      | *   |
| Cyp4a10   | 2.288889e-02 | up      | *   |
| Cxcl2     | 2.507493e-02 | up      | *   |
| GLDH      | 2.896681e-02 | up      | *   |
| Hmox1     | 2.913971e-02 | up      | *   |
| Socs3     | 3.604221e-02 | up      | *   |
| Sult1a1   | 3.632014e-02 | up      | *   |

```
# top down
print(p.df.down)
```

|            | p.value     | up_down | sig |
|------------|-------------|---------|-----|
| Cdh2       | 0.005994558 | down    | **  |
| Pde4a      | 0.010806348 | down    | *   |
| Sirius.red | 0.014252420 | down    | *   |
| Pten       | 0.014853870 | down    | *   |
| Col3a1     | 0.017104924 | down    | *   |
| Nes        | 0.026669560 | down    | *   |
| Il28b      | 0.027571476 | down    | *   |
| Cdh1       | 0.027687939 | down    | *   |
| Tgfb1      | 0.032921400 | down    | *   |
| Il10ra     | 0.035845273 | down    | *   |
| Cyp2e1     | 0.038398167 | down    | *   |
| Cyp7a1     | 0.038785457 | down    | *   |
| Xiap       | 0.041507273 | down    | *   |

\*\*Results:\*\* In the initial phase more more up-regulations than down-regulations are observed.

## Correlation analysis

For the correlation analysis between factors and the subsequent cluster analysis a correlation measure for time series data (Son2008) in combination with Complete-Linkage hierarchical clustering was used. This combination of methods provided the best enrichments on gene-expression time-series in a recent comparisons of methods (Jaskowiak2014, Jaskowiak2013).

The calculation of correlation coefficients between factors  $i$  and  $j$  ( $i, j = 1, \dots, N_p$ ) was performed using the slightly modified correlation coefficient based similarity measure developed for clustering of time-course data.  $Y_{i,j}^{S2}$  and  $Y_{i,j}^{R2}$  are hereby linear combinations of (i) a classical correlation part based on Spearman correlation  $S_{i,j}^*$  in case of  $Y_{i,j}^{S2}$  or Pearson  $R_{i,j}^*$  in case of  $Y_{i,j}^{R2}$ , (ii) a component  $A_{i,j}^*$  accounting for the similarity in changes between two time courses, (iii) a component  $M_{i,j}^*$  comparing the location of minimum and maximum values of the time course (see (Son2008) for definitions)

$$Y_{i,j}^{S2} = w_1 S_{i,j}^* + w_2 A_{i,j}^* + w_3 M_{i,j}^*$$

$$Y_{i,j}^{R2} = w_1 R_{i,j}^* + w_2 A_{i,j}^* + w_3 M_{i,j}^*$$

$R_{i,j}^*$  and  $S_{i,j}^*$  are hereby calculated on the individual data points for the factors i and j,  $A_{i,j}^*$  and  $M_{i,j}^*$  on the mean time courses averaged over the  $N_r$  repeated measurements. Throughout the analysis the following weights were used  $w_1 = 0.5$ ,  $w_2 = 0.3$ ,  $w_3 = 0.2$ .

In the calculation of the change component we used a Spearman correlation based measure ( $A^{**}$ ) instead of the originally proposed Pearson measure ( $A^*$ ) resulting in the correlation scores  $Y_{i,j}^{S3}$  and  $Y_{i,j}^{R3}$

$$Y_{i,j}^{S3} = w_1 S_{i,j}^* + w_2 A_{i,j}^{**} + w_3 M_{i,j}^*$$

$$Y_{i,j}^{R3} = w_1 R_{i,j}^* + w_2 A_{i,j}^{**} + w_3 M_{i,j}^*$$

Herein,  $A_{i,j}^{**}$  calculates the correlation of changes between factors i and j based on Spearman correlation analog  $A_{i,j}^*$  as

$$A_{i,j}^{**} = (S(d_i, d_j) + 1)/2$$

$$A_{i,j}^* = (R(d_i, d_j) + 1)/2$$

The reason for this adaption was that initial analysis showed a strong dependency of the change components on outliers.

All calculated correlation scores  $Y^S$  and  $Y^R$  are transformed from  $[0, 1]$  to  $[-1, 1]$  via

$$Y_{norm}^S = 2(Y^S - 0.5)$$

$$Y_{norm}^R = 2(Y^R - 0.5)$$

In addition  $Y^S$  and  $Y^R$  Pearson (R) and Spearman (S) correlations were calculated for comparison.

```
suppressPackageStartupMessages(library(corrplot))
dir.create(file.path(resultsPath, 'correlation'), showWarnings=FALSE)

# list of calculated correlation methods
correlation_methods <- c("pearson", "spearman", "ys1", "ys2", "ys3", "yr1", "yr2", "yr3")

# calculated correlation matrices are stored in cor.matrices
cor.matrices <- vector("list", length=length(correlation_methods))
names(cor.matrices) <- correlation_methods
```

## Pearson & Spearman correlation

To get an overview over the correlation structure of the data set, we first calculated Pearson  $R_{i,j}$  and Spearman  $S_{i,j}$  correlation were calculated for the subset of filtered factors.

```
# Spearman and Pearson on individual data points
cor.matrices$pearson <- cor(BDLdata.fil, method="pearson", use="pairwise.complete.obs")
cor.matrices$spearman <- cor(BDLdata.fil, method="spearman", use="pairwise.complete.obs")
```

Heatmap plot of the correlation matrices with factors in original order

```
# Heatmap of correlation matrix
correlation_heatmap <- function(method){
  data <- cor.matrices[[method]]
  if(is.null(data)){
    stop("Correlation matrix does not exist for method: ", method)
  }
}
```

```
}  
cor_colors <- HeatmapColors() # color palette for correlation (red - white - blue)  
heatmap.2(data, col=cor_colors(10), scale="none",  
  key=TRUE, symkey=FALSE, trace="none", cexRow=0.8, cexCol=0.8,  
  main=method,  
  density.info="none", dendrogram="none",  
  Rowv=NULL, Colv=NULL,  
  keysize=0.8, key.xlab = method,  
  #revC=TRUE,  
  sepwidth=c(0.01,0.01),  
  sepcolor="black",  
  colsep=1:ncol(data),  
  rowsep=1:nrow(data))  
}
```

```
# Pearson correlation (no clustering)  
correlation_heatmap(method="pearson")
```

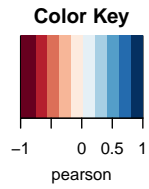

pearson

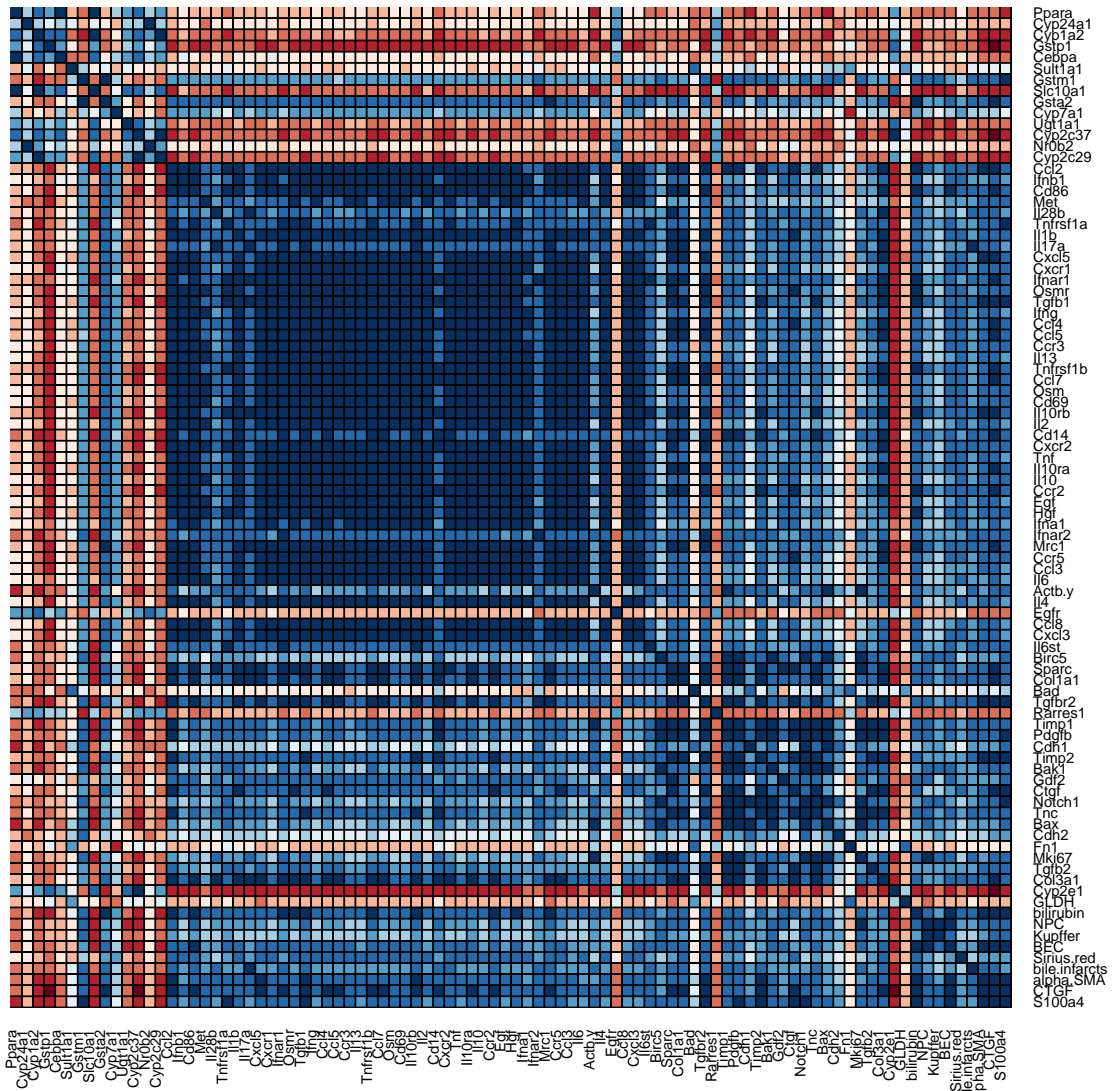

Figure: Heatmap of Pearson correlation. Correlation matrix based on Pearson correlation for filtered data set. No clustering was applied.

```
# Spearman correlation (no clustering)
correlation_heatmap(method="spearman")
```



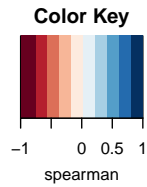

## spearman

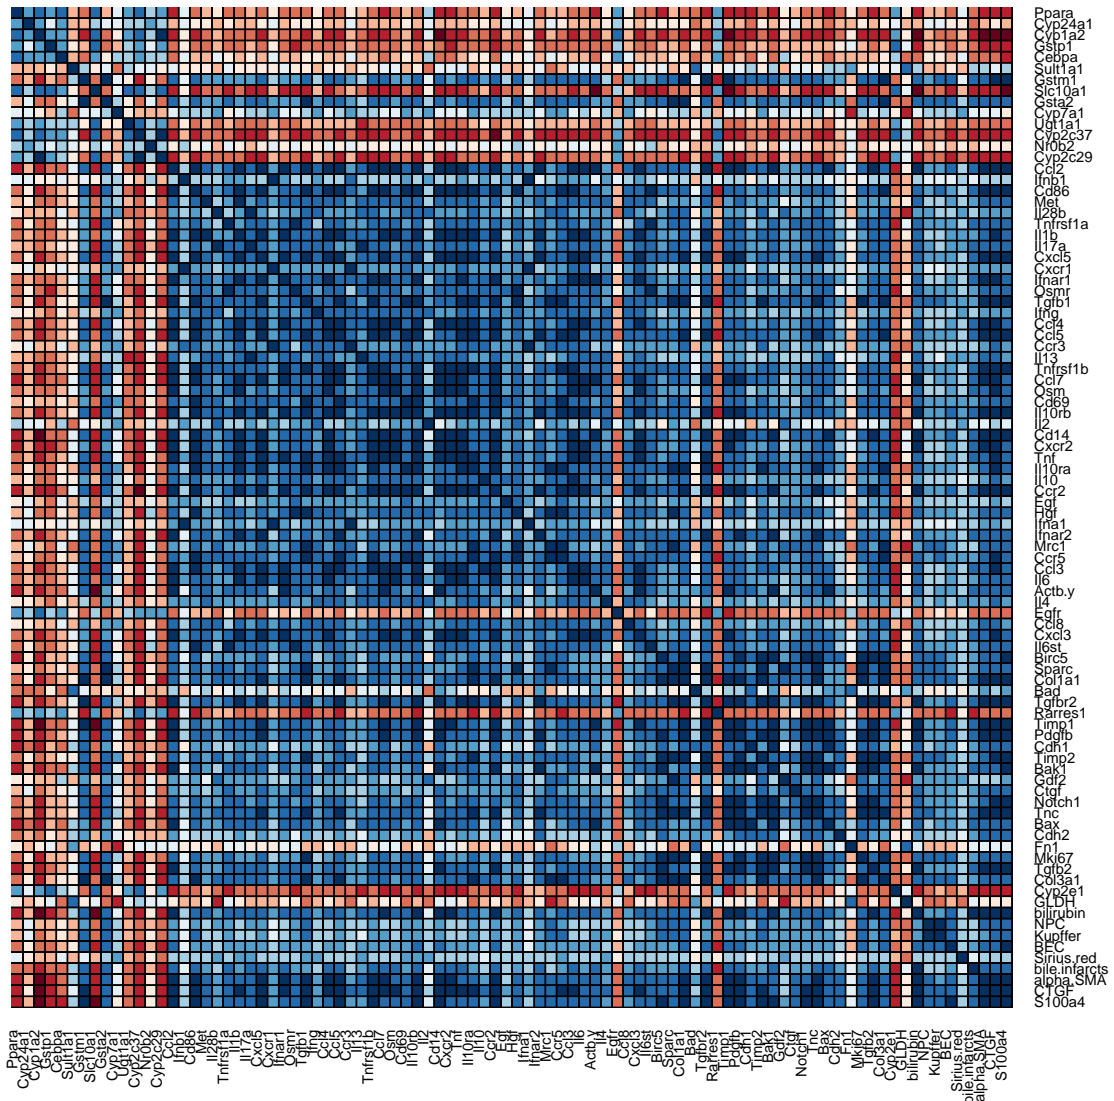

Figure: Heatmap of Spearman correlation. Correlation matrix based on Spearman correlation for filtered data set. No clustering was applied.

**Results:** The general correlation structure is similar between Pearson and Spearman, but the Pearson correlation showed much more sensitivity to outliers resulting in a large block of very high correlated factors. Spearman based correlation coped much better with these outliers. Preliminary analysis of  $A^*$  showed similar problems, so we used  $A^{**}$  in  $Y^{S3}$  instead.

## YS & YR correlation

Now the time-course based correlation measurements  $Y^{S1}$ ,  $Y^{S2}$ ,  $Y^{S3}$ ,  $Y^{R1}$ ,  $Y^{R2}$  and  $Y^{R3}$  are calculated for all factors in the filtered data set. For the calculation of the correlation matrix all pairwise correlations

between the factors were calculated. In the later analysis only the outlier robust  $Y^{S3}$  is used.

```
# weighting factors
w <- list(w1=0.5, w2=0.3, w3=0.2)

# calculate the YSR component matrices on the filtered data set (A, A*, A**, M, M*)
# all components are calculated on the mean data
ysr.res <- ysr.matrices(BDLmean.fil, BDLmean.time, use="pairwise.complete.obs")

# S* and R* (Pearson & Spearman correlation on individual data points)
cor.S_star <- (cor.matrices$spearman + 1)/2
cor.R_star <- (cor.matrices$pearson + 1)/2

# Calculate YS and YR scores based on the components
ysr_methods <- c("ys1", "ys2", "ys3", "yr1", "yr2", "yr3")
cor.ysr <- vector("list", length(ysr_methods))
names(cor.ysr) <- ysr_methods

# unnormalized correlations in [0, 1] as combination of weighted (S/R, A/A*/A**, M/M*)
cor.ysr$ys1 <- w$w1*cor.S_star + w$w2*ysr.res$A      + w$w3*ysr.res$M
cor.ysr$ys2 <- w$w1*cor.S_star + w$w2*ysr.res$A_star + w$w3*ysr.res$M_star
cor.ysr$ys3 <- w$w1*cor.S_star + w$w2*ysr.res$A_star2 + w$w3*ysr.res$M_star

cor.ysr$yr1 <- w$w1*cor.R_star + w$w2*ysr.res$A      + w$w3*ysr.res$M
cor.ysr$yr2 <- w$w1*cor.R_star + w$w2*ysr.res$A_star + w$w3*ysr.res$M_star
cor.ysr$yr3 <- w$w1*cor.R_star + w$w2*ysr.res$A_star2 + w$w3*ysr.res$M_star

# scaling of ysr correlation coefficient to interval [-1,1]
for (method in ysr_methods){
  cor.matrices[[method]] <- 2*(cor.ysr[[method]]-0.5)
}

# Save correlation matrices
save(cor.matrices, file=file.path(resultsPath, "data", "cor.matrices.Rdata"))
rm(cor.ysr, cor.R_star, cor.S_star, ysr.res, ysr_methods)
```

Create heatmap plots for all calculated correlation matrices

```
# create all correlation heatmaps on disk
hmap.settings <- list(width=10, height=10, pointsize=12)
for (method in correlation_methods){
  fname <- sprintf('cor.%s.pdf', method)
  pdf(file.path(resultsPath, "correlation", fname),
      width=hmap.settings$width, height=hmap.settings$height,
      pointsize=hmap.settings$pointsize)
  correlation_heatmap(method=method)
  invisible(dev.off())
  rm(method, fname)
}
```

```
# ys3 heatmap in report
correlation_heatmap(method="ys3")
```

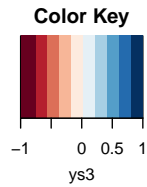

ys3

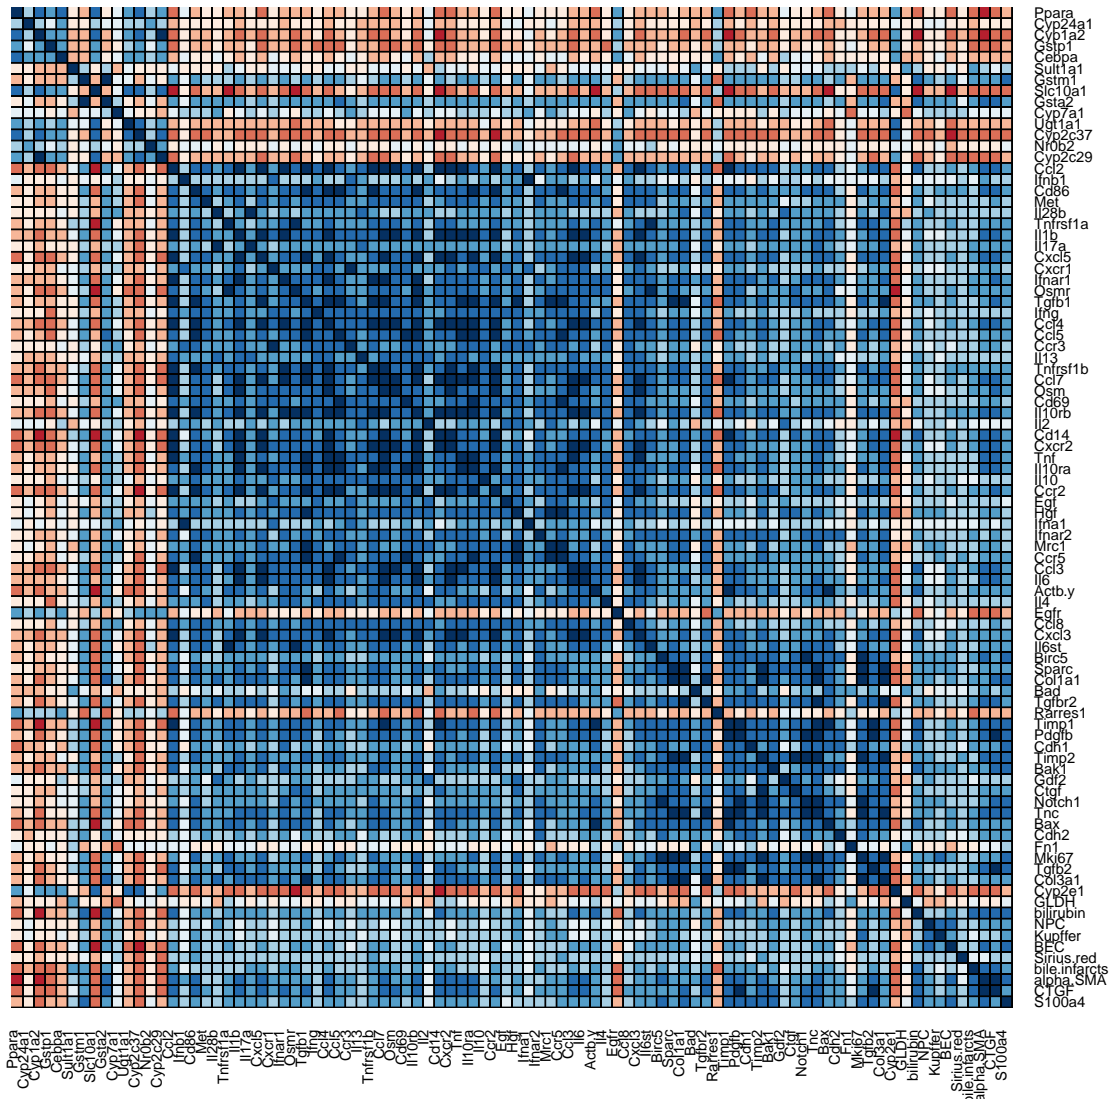

Figure: Heatmap of YS3 correlation. Correlation matrix based on YS3 correlation for filtered data set. No clustering was applied.

## Hierarchical clustering

### Clustering

Now clusters are calculated based on the calculated correlation matrices using hierarchical clustering with complete linkage. Hereby, the factors are grouped into a number of clusters with the correlation within each cluster being larger than between clusters. For a time course based correlation measure like  $Y^{S3}$  this effectively

finds groups of factors which have similar time courses. The complete linkage method defines the cluster distance between two clusters to be the maximum distance between their individual components.

The resulting hierarchical clustering based on the given correlation matrix is split into `Ngroups=6` clusters (preliminary analysis showed that a higher number of clusters results in clusters with only one member). The number of clusters was chosen, so that at least `>1` members exist per cluster.

```
hclust.res <- vector("list", length=length(correlation_methods))
names(hclust.res) <- correlation_methods

# Calculate hierarical clustering: N clusters for correlation based on method
calculate_clusters <- function(cor_method, N){
  # get correlation matrix
  cor.cluster <- cor.matrices[[cor_method]]
  # perform hierarchical clustering (complete linkage & Euclidion distance measure)
  hc <- hclust(dist(cor.cluster, method="euclidian"), method="complete")
  # cut into the clusters
  groups <- cutree(hc, k=Ngroups)
  groups.hc.order <- groups[hc$order]
  # store results
  return(list(hc=hc,
             groups=groups,
             groups.hc.order=groups.hc.order))
}

Ngroups <- 6 # number of clusters
for (method in correlation_methods){
  hclust.res[[method]] <- calculate_clusters(cor_method=method, N=Ngroups)
}
# save clustering
save(hclust.res, file=file.path(resultsPath, "data", "hclust.res.Rdata"))
rm(method)
```

In the next step the correlation matrices are plotted in combination with the clustering results (dendrogram) and the clusters as side colors.

```
# Create correlation heatmap with hierachical clustering results
correlation_heatmap_cluster <- function(method){
  # matrix and cluster results
  cor.cluster <- cor.matrices[[method]]
  hc.res <- hclust.res[[method]]
  hc <- hc.res$hc
  groups <- hc.res$groups
  # colors
  hmap_colors <- HeatmapColors()
  colorset <- brewer.pal(Ngroups, "Set1")
  color.map <- function(cluster_id) {return(colorset[cluster_id])}
  clusterColors <- unlist(lapply(groups, color.map))

  heatmap.2(cor.cluster, col=hmap_colors(10), scale="none",
            key=TRUE, symkey=FALSE, trace="none", cexRow=0.8, cexCol=0.8,
            main=method,
            density.info="none", dendrogram="column",
            Rowv=as.dendrogram(hc), Colv=as.dendrogram(hc),
```

```

    keysize=0.8,
    key.xlab=method,
    ColSideColors=clusterColors, revC=TRUE,
    sepwidth=c(0.01,0.01),
    sepcolor="black",
    colsep=1:ncol(cor.cluster),
    rowsep=1:nrow(cor.cluster),
    margins=c(12,8)
  legend("left", legend=paste("c", 1:6, sep=""),
        col= unlist(lapply(1:6, color.map)), pch=15, bty="n")
}

# plot to files
for(method in correlation_methods){
  pdf(file.path(resultsPath, "correlation", sprintf("cor.%s.hclust.pdf", method)),
      width=10, height=10, pointsize=12)
  correlation_heatmap_cluster(method=method)
  invisible(dev.off())
}
rm(method)

# plot ys3 clustering to report
correlation_heatmap_cluster(method="ys3")

```

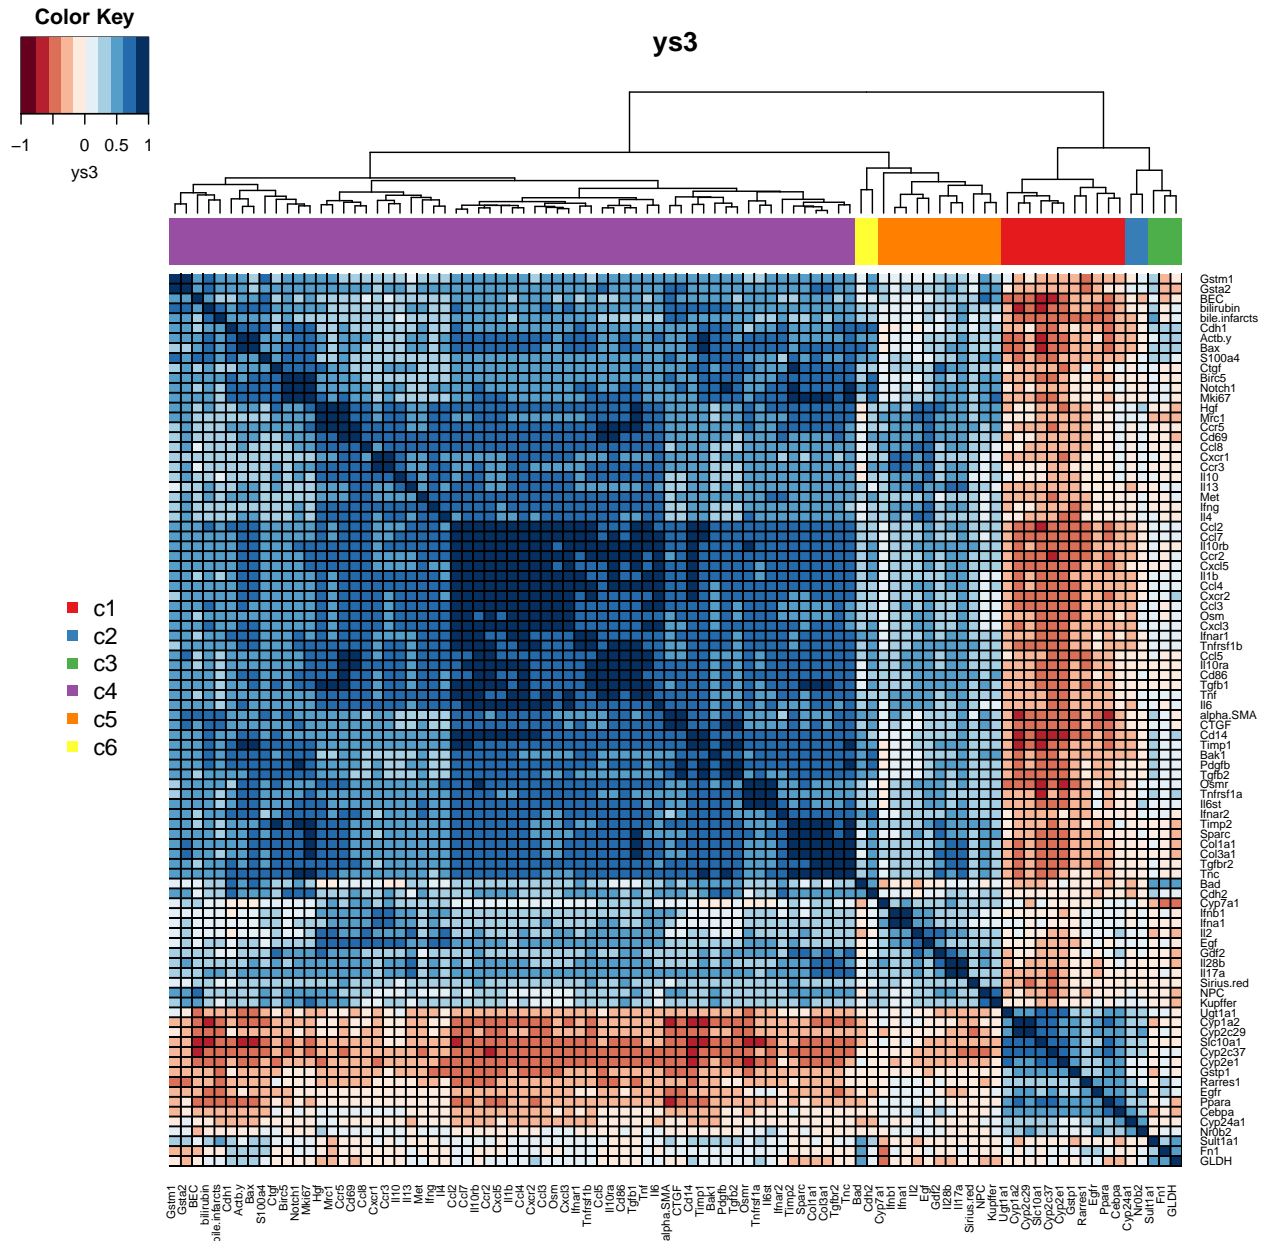

Figure: Heatmap of YS3 clustering. Correlation matrix based on YS3 correlation for filtered data set with hierarchical clustering results based on complete linkage.

The following factors are in the `ys3` time course clusters.

```
# print representatives of cluster
list_cluster_members <- function(method){
  groups <- hclust.res[[method]]$groups
  cat(sprintf("-----\n"))
  cat(sprintf("Correlation method: *** %s ***\n", method))
  cat(sprintf("-----\n"))
  for (k in 1:Ngroups){
    g <- groups[groups==k]
    cat(sprintf("Cluster %s (N=%s)\n", k, length(g)))
    print(names(g))
  }
}
```

```

cat("\n")
# print(paste(names(g), sep=", ", collapse =", " ))
}
}

```

```
list_cluster_members(method="ys3")
```

```
-----
Correlation method: *** ys3 ***
-----
```

```
Cluster 1 (N=11)
```

```
[1] "Ppara" "Cyp1a2" "Gstp1" "Cebpa" "Slc10a1" "Ugt1a1" "Cyp2c37"
[8] "Cyp2c29" "Egfr" "Rarres1" "Cyp2e1"
```

```
Cluster 2 (N=2)
```

```
[1] "Cyp24a1" "Nr0b2"
```

```
Cluster 3 (N=3)
```

```
[1] "Sult1a1" "Fn1" "GLDH"
```

```
Cluster 4 (N=61)
```

```
[1] "Gstm1" "Gsta2" "Ccl2" "Cd86"
[5] "Met" "Tnfrsf1a" "Il1b" "Cxc15"
[9] "Cxcr1" "Ifnar1" "Osmr" "Tgfb1"
[13] "Ifng" "Ccl4" "Ccl5" "Ccr3"
[17] "Il13" "Tnfrsf1b" "Ccl7" "Osm"
[21] "Cd69" "Il10rb" "Cd14" "Cxcr2"
[25] "Tnf" "Il10ra" "Il10" "Ccr2"
[29] "Hgf" "Ifnar2" "Mrc1" "Ccr5"
[33] "Ccl3" "Il6" "Actb.y" "Il4"
[37] "Ccl8" "Cxc13" "Il6st" "Birc5"
[41] "Sparc" "Col1a1" "Tgfbr2" "Timp1"
[45] "Pdgfb" "Cdh1" "Timp2" "Bak1"
[49] "Ctgf" "Notch1" "Tnc" "Bax"
[53] "Mki67" "Tgfb2" "Col3a1" "bilirubin"
[57] "BEC" "bile.infarcts" "alpha.SMA" "CTGF"
[61] "S100a4"
```

```
Cluster 5 (N=11)
```

```
[1] "Cyp7a1" "Ifnb1" "Il28b" "Il17a" "Il2"
[6] "Egf" "Ifna1" "Gdf2" "NPC" "Kupffer"
[11] "Sirius.red"
```

```
Cluster 6 (N=2)
```

```
[1] "Bad" "Cdh2"
```

## Correlations for non-transcript factors

In the following steps we look at specific parts of the correlation matrix. First we are interested in the correlations between transcripts and classical factors, i.e. biochemical and (immuno-)histochemical factors. The genes are filtered based on a cutoff for the correlation, i.e. columns in which no correlation coefficient  $\text{abs}(\text{value}) \geq \text{cor.cutoff}$  exists are filtered out. Consequently, only transcripts are retained with a absolute correlation coefficient above this threshold.

```

get_histological_correlations <- function(method="ys3", cor.cutoff=0.6){
  # correlation matrix
  cor_mat <- cor.matrices[[method]]

  # non-transcript factors accepted by ANOVA
  hist_facs <- BDLfactors$id[anova.accept &
    (BDLfactors$ftype %in% c("Biochemistry", "Histochemistry"))]

  # get indices of these factors in correlation matrix
  hist_idx <- rep(NA, length(hist_facs))
  for (k in 1:length(hist_facs)){
    hist_idx[k] <- which(colnames(cor_mat) == hist_facs[k])
  }
  # subset of correlation matrix for histological markers (corresponding rows)
  hist_data <- cor_mat[hist_idx, ]

  # filter columns by correlation cutoff
  col.accept <- rep(NA, ncol(hist_data))
  for (k in 1:ncol(hist_data)){
    # keep column if any abs(correlation) >= cutoff in the column
    col.accept[k] <- any( abs(hist_data[,k])>=cor.cutoff )
  }
  # accepted factors
  # print(table(col.accept))
  hist_accept <- hist_data[, col.accept]

  # sort by the hierarchical cluster ordering
  hist_gene_names <- colnames(hist_accept)[1:(ncol(hist_accept)-nrow(hist_accept))]

  # correlation based cluster for ordering
  hc.res <- hclust.res[[method]]

  # create sort index for gene names based on clustering
  sort_idx <- rep(NA, length(hist_gene_names))
  for (k in 1:length(hist_gene_names)){
    sort_idx[k] <- which(names(hc.res$groups.hc.order) == hist_gene_names[k])
  }
  # first the sort genes, at the end the self correlation of the histological factors
  hist_sorted <- hist_accept[, c(hist_gene_names[order(sort_idx)], rownames(hist_data))]
  return(hist_sorted)
}

histological_correlations <- get_histological_correlations(method="ys3")

# plot subset of correlations matrix to file
plot_histological_correlations <- function(hist_data){
  hmap_colors <- HeatmapColors()
  corrpplot(hist_data, method="circle", type="full",
    tl.cex=0.7, tl.col="black", col=hmap_colors(10))
}

# plot to file
pdf(file.path(resultsPath, "correlation", "histological_correlations.pdf"),

```



```
width=10, height=4, pointsize=12)
plot_histological_correlations(histological_correlations)
invisible(dev.off())
```

```
# print correlation values
options(width=200)
print(round(t(histological_correlations), digits=2))
```

|               | GLDH  | bilirubin | NPC   | Kupffer | BEC   | Sirius.red | bile.infarcts | alpha.SMA | CTGF  | S100a4 |
|---------------|-------|-----------|-------|---------|-------|------------|---------------|-----------|-------|--------|
| Gstm1         | -0.02 | 0.61      | 0.42  | 0.40    | 0.43  | 0.10       | 0.59          | 0.55      | 0.57  | 0.70   |
| Gsta2         | -0.21 | 0.61      | 0.51  | 0.41    | 0.46  | 0.19       | 0.59          | 0.64      | 0.62  | 0.59   |
| Cdh1          | 0.24  | 0.46      | 0.25  | 0.34    | 0.35  | 0.18       | 0.42          | 0.54      | 0.54  | 0.61   |
| Actb.y        | 0.22  | 0.61      | 0.29  | 0.33    | 0.47  | 0.29       | 0.50          | 0.46      | 0.60  | 0.52   |
| Bax           | 0.23  | 0.61      | 0.31  | 0.35    | 0.42  | 0.38       | 0.44          | 0.48      | 0.55  | 0.59   |
| Birc5         | -0.04 | 0.57      | 0.53  | 0.50    | 0.42  | 0.36       | 0.41          | 0.61      | 0.59  | 0.72   |
| Notch1        | -0.04 | 0.52      | 0.43  | 0.50    | 0.31  | 0.26       | 0.39          | 0.53      | 0.61  | 0.71   |
| Mki67         | -0.15 | 0.50      | 0.59  | 0.61    | 0.47  | 0.35       | 0.39          | 0.55      | 0.57  | 0.68   |
| Ccl2          | 0.17  | 0.66      | 0.25  | 0.25    | 0.52  | 0.36       | 0.54          | 0.61      | 0.72  | 0.46   |
| Ccl7          | 0.15  | 0.60      | 0.18  | 0.22    | 0.49  | 0.32       | 0.48          | 0.62      | 0.67  | 0.48   |
| Il10rb        | 0.00  | 0.57      | 0.31  | 0.33    | 0.50  | 0.40       | 0.46          | 0.64      | 0.70  | 0.50   |
| Ccr2          | 0.03  | 0.56      | 0.29  | 0.29    | 0.53  | 0.33       | 0.49          | 0.59      | 0.74  | 0.46   |
| Cxcl5         | 0.00  | 0.54      | 0.26  | 0.23    | 0.49  | 0.34       | 0.43          | 0.73      | 0.75  | 0.53   |
| Il1b          | 0.07  | 0.54      | 0.18  | 0.17    | 0.38  | 0.37       | 0.37          | 0.63      | 0.71  | 0.48   |
| Ccl4          | 0.13  | 0.55      | 0.16  | 0.22    | 0.45  | 0.33       | 0.42          | 0.61      | 0.68  | 0.46   |
| Cxcr2         | 0.22  | 0.55      | 0.15  | 0.15    | 0.44  | 0.33       | 0.42          | 0.61      | 0.71  | 0.44   |
| Ccl3          | 0.18  | 0.62      | 0.16  | 0.17    | 0.45  | 0.23       | 0.53          | 0.62      | 0.69  | 0.50   |
| Osm           | 0.19  | 0.59      | 0.15  | 0.14    | 0.38  | 0.37       | 0.45          | 0.59      | 0.63  | 0.51   |
| Cxcl3         | 0.18  | 0.61      | 0.12  | 0.18    | 0.41  | 0.36       | 0.44          | 0.53      | 0.57  | 0.47   |
| Ifnar1        | 0.11  | 0.56      | 0.21  | 0.23    | 0.36  | 0.30       | 0.44          | 0.56      | 0.67  | 0.49   |
| Il10ra        | -0.15 | 0.46      | 0.31  | 0.30    | 0.39  | 0.33       | 0.38          | 0.62      | 0.68  | 0.44   |
| Cd86          | -0.07 | 0.45      | 0.39  | 0.41    | 0.46  | 0.40       | 0.32          | 0.62      | 0.72  | 0.44   |
| Tgfb1         | -0.14 | 0.48      | 0.41  | 0.40    | 0.46  | 0.38       | 0.39          | 0.60      | 0.68  | 0.48   |
| Tnf           | 0.00  | 0.49      | 0.25  | 0.25    | 0.34  | 0.31       | 0.40          | 0.60      | 0.69  | 0.49   |
| Il6           | 0.03  | 0.51      | 0.13  | 0.20    | 0.40  | 0.25       | 0.37          | 0.65      | 0.61  | 0.52   |
| Cd14          | 0.21  | 0.67      | 0.29  | 0.21    | 0.50  | 0.37       | 0.47          | 0.67      | 0.77  | 0.50   |
| Timp1         | 0.12  | 0.67      | 0.32  | 0.34    | 0.50  | 0.27       | 0.57          | 0.73      | 0.73  | 0.64   |
| Bak1          | 0.08  | 0.60      | 0.43  | 0.40    | 0.40  | 0.35       | 0.41          | 0.56      | 0.67  | 0.60   |
| Pdgfb         | 0.08  | 0.62      | 0.33  | 0.37    | 0.41  | 0.30       | 0.48          | 0.69      | 0.80  | 0.72   |
| Tgfb2         | 0.11  | 0.58      | 0.30  | 0.33    | 0.38  | 0.28       | 0.51          | 0.73      | 0.82  | 0.72   |
| Timp2         | -0.24 | 0.51      | 0.47  | 0.39    | 0.37  | 0.42       | 0.38          | 0.63      | 0.62  | 0.68   |
| Coll1a1       | -0.22 | 0.55      | 0.53  | 0.38    | 0.48  | 0.38       | 0.42          | 0.59      | 0.61  | 0.66   |
| Tgfb2         | -0.10 | 0.59      | 0.47  | 0.31    | 0.37  | 0.31       | 0.46          | 0.69      | 0.78  | 0.59   |
| Tnc           | -0.10 | 0.54      | 0.43  | 0.37    | 0.40  | 0.33       | 0.42          | 0.70      | 0.73  | 0.67   |
| Cyp1a2        | -0.15 | -0.60     | -0.11 | -0.05   | -0.44 | -0.20      | -0.56         | -0.70     | -0.60 | -0.45  |
| Slc10a1       | -0.17 | -0.62     | -0.38 | -0.29   | -0.66 | -0.37      | -0.50         | -0.54     | -0.55 | -0.44  |
| Cyp2c37       | 0.03  | -0.55     | -0.41 | -0.25   | -0.66 | -0.41      | -0.49         | -0.59     | -0.55 | -0.44  |
| Ppara         | -0.22 | -0.47     | -0.18 | -0.05   | -0.49 | -0.05      | -0.41         | -0.61     | -0.59 | -0.37  |
| GLDH          | 1.00  | 0.18      | -0.30 | -0.20   | -0.02 | -0.10      | 0.14          | -0.04     | -0.06 | 0.08   |
| bilirubin     | 0.18  | 1.00      | 0.39  | 0.26    | 0.49  | 0.35       | 0.71          | 0.65      | 0.69  | 0.62   |
| NPC           | -0.30 | 0.39      | 1.00  | 0.75    | 0.62  | 0.32       | 0.25          | 0.41      | 0.46  | 0.54   |
| Kupffer       | -0.20 | 0.26      | 0.75  | 1.00    | 0.57  | 0.30       | 0.10          | 0.27      | 0.25  | 0.47   |
| BEC           | -0.02 | 0.49      | 0.62  | 0.57    | 1.00  | 0.36       | 0.39          | 0.60      | 0.56  | 0.62   |
| Sirius.red    | -0.10 | 0.35      | 0.32  | 0.30    | 0.36  | 1.00       | 0.06          | 0.20      | 0.21  | 0.38   |
| bile.infarcts | 0.14  | 0.71      | 0.25  | 0.10    | 0.39  | 0.06       | 1.00          | 0.61      | 0.63  | 0.44   |
| alpha.SMA     | -0.04 | 0.65      | 0.41  | 0.27    | 0.60  | 0.20       | 0.61          | 1.00      | 0.84  | 0.69   |
| CTGF          | -0.06 | 0.69      | 0.46  | 0.25    | 0.56  | 0.21       | 0.63          | 0.84      | 1.00  | 0.60   |
| S100a4        | 0.08  | 0.62      | 0.54  | 0.47    | 0.62  | 0.38       | 0.44          | 0.69      | 0.60  | 1.00   |

```
options(width=75)
```

```
plot_histological_correlations(histological_correlations)
```

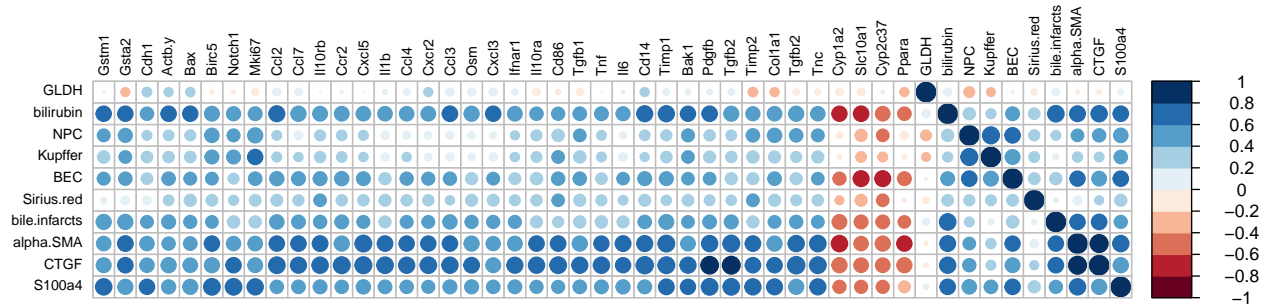

Figure: Correlations to classical factors. Correlations between transcripts and classical factors, i.e. biochemical and (immuno-)histochemical factors. The genes are filtered based on a cutoff for the correlation, i.e. columns in which no correlation coefficient  $\text{abs}(\text{value}) \geq \text{cor.cutoff}$  exists are filtered out.

### Top correlations for classical factors

In the next step the top correlations of every classical factor, i.e. (immuno-)histochemical (H) and biochemical (B) factors, are calculated, with the top correlations being sorted by absolute correlation values.

```
plot_hist_topcors <- function(method="ys3", labels=TRUE, mfrow=c(10,1),
                              only_RNA=FALSE, Ntop=10){
  hist_facs <- rownames(histological_correlations)
  cor.mat <- cor.matrices[[method]]

  # store the results
  top.correlations <- vector("list", length=length(hist_facs))
  names(top.correlations) <- hist_facs

  par(mfrow=mfrow)
  hmap_colors <- HeatmapColors()
  for (name in hist_facs){
    if (only_RNA==TRUE){
      # get which which are not classical factors
      v <- cor.mat[!(colnames(cor.mat) %in% hist_facs), name]
    } else {
      # get all factors (including other non-RNA factors)
      v <- cor.mat[, name]
    }
    # sort by absolute correlation
    v.sorted <- rev(v[order(abs(v))])
    # and get the Ntop values without the self-correlation (idx=1)
    mv <- t(as.matrix(v.sorted[2:(Ntop+1)]))
    rownames(mv) <- c(name)
    # store
    top.correlations[[name]] <- mv

    # plot without labels to have identical size of figure
    if (labels==FALSE){
```

```

rownames(mv) <- NULL
colnames(mv) <- NULL
}
corrplot(mv, method="pie", type="full",
         tl.cex=1.0, tl.col="black", col=hmap_colors(100), insig="p-value", sig.level=-1,
         p.mat=mv, cl.pos="n")
}
par(mfrow=c(1,1))
return(invisible(top.correlations))
}

# plot to file
# necessary to plot once with and without labels so that all the plots are scaled equally
pdf(file.path(resultsPath, "correlation", "histological_topcors_1.pdf"),
    width=10, height=10, pointsize=12)
plot_hist_topcors(method="ys3", labels=TRUE)
invisible(dev.off())
pdf(file.path(resultsPath, "correlation", "histological_topcors_2.pdf"),
    width=10, height=10, pointsize=12)
plot_hist_topcors(method="ys3", labels=FALSE)
invisible(dev.off())

```

```
top.correlations <- plot_hist_topcors(method="ys3", labels=TRUE, mfrow=c(5,2))
```

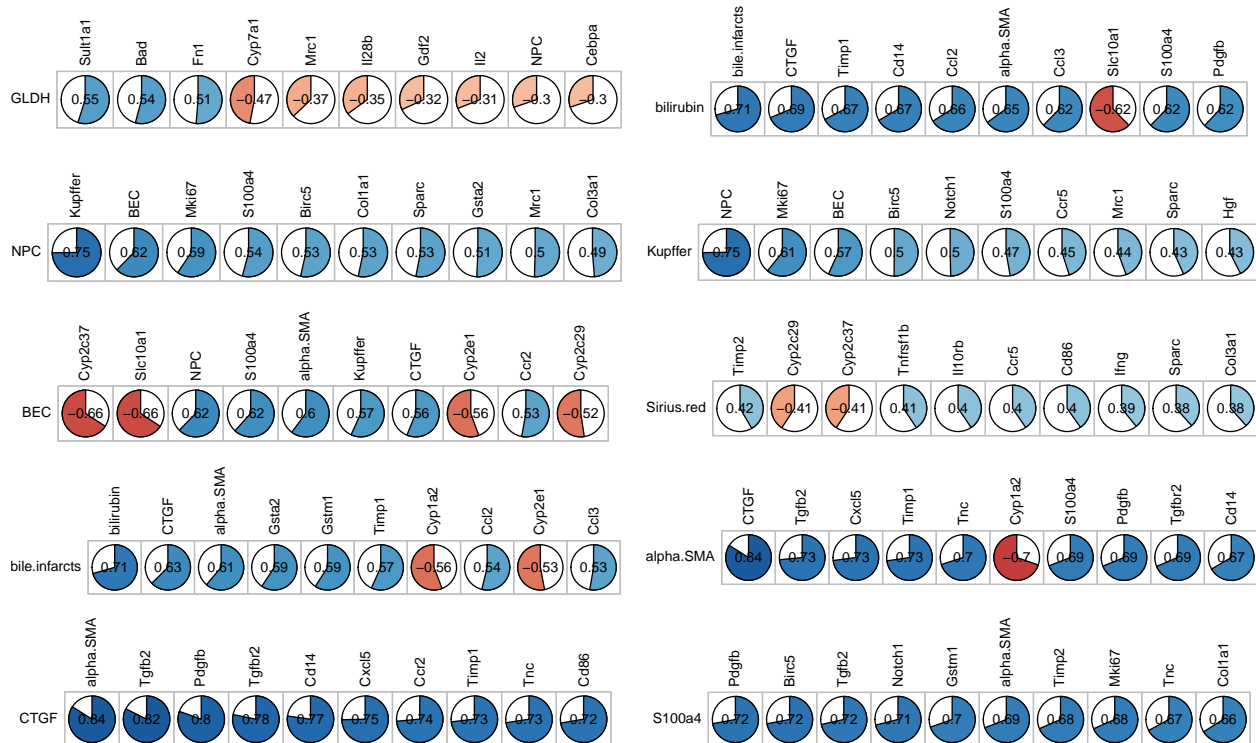

Figure: Top correlations to classical factors.

```

# print top correlations
options(width=200)
for (mv in top.correlations){

```

```
print(round(mv, digits=2))
cat("\n")
}
```

```

Sult1a1 Bad Fn1 Cyp7a1 Mrc1 Il28b Gdf2 Il2 NPC Cebpa
GLDH 0.55 0.54 0.51 -0.47 -0.37 -0.35 -0.32 -0.31 -0.3 -0.3

bile.infarcts CTGF Timp1 Cd14 Ccl2 alpha.SMA Ccl3 Slc10a1 S100a4 Pdgfb
bilirubin 0.71 0.69 0.67 0.67 0.66 0.65 0.62 -0.62 0.62 0.62

Kupffer BEC Mki67 S100a4 Birc5 Col1a1 Sparc Gsta2 Mrc1 Col3a1
NPC 0.75 0.62 0.59 0.54 0.53 0.53 0.53 0.51 0.5 0.49

NPC Mki67 BEC Birc5 Notch1 S100a4 Ccr5 Mrc1 Sparc Hgf
Kupffer 0.75 0.61 0.57 0.5 0.5 0.47 0.45 0.44 0.43 0.43

Cyp2c37 Slc10a1 NPC S100a4 alpha.SMA Kupffer CTGF Cyp2e1 Ccr2 Cyp2c29
BEC -0.66 -0.66 0.62 0.62 0.6 0.57 0.56 -0.56 0.53 -0.52

Timp2 Cyp2c29 Cyp2c37 Tnfrsf1b Il10rb Ccr5 Cd86 Ifng Sparc Col3a1
Sirius.red 0.42 -0.41 -0.41 0.41 0.4 0.4 0.4 0.39 0.38 0.38

bilirubin CTGF alpha.SMA Gsta2 Gstm1 Timp1 Cyp1a2 Ccl2 Cyp2e1 Ccl3
bile.infarcts 0.71 0.63 0.61 0.59 0.59 0.57 -0.56 0.54 -0.53 0.53

CTGF Tgfb2 Cxcl5 Timp1 Tnc Cyp1a2 S100a4 Pdgfb Tgfbr2 Cd14
alpha.SMA 0.84 0.73 0.73 0.73 0.7 -0.7 0.69 0.69 0.69 0.67

alpha.SMA Tgfb2 Pdgfb Tgfbr2 Cd14 Cxcl5 Ccr2 Timp1 Tnc Cd86
CTGF 0.84 0.82 0.8 0.78 0.77 0.75 0.74 0.73 0.73 0.72

Pdgfb Birc5 Tgfb2 Notch1 Gstm1 alpha.SMA Timp2 Mki67 Tnc Col1a1
S100a4 0.72 0.72 0.72 0.71 0.7 0.69 0.68 0.68 0.67 0.66
```

```
options(width=75)
rm(mv)
```

## Mean cluster time course

In the next step, we are interested in the time courses of the found clusters: What are the typical profiles found in the different clusters and which factors are in these clusters. For the comparison of individual factors against each other and against the mean time course of the cluster the factors were normalized. The normalization was hereby performed for every factor separately based on

$$f_k^{norm}(t_{i,r}) = \frac{f_k(t_{i,r}) - \langle f_k \rangle}{\max(f_k) - \min(f_k)}$$

```
suppressPackageStartupMessages(library(matrixStats))
dir.create(file.path(resultsPath, 'cluster'), showWarnings=FALSE)

# normalize single factor
normalize_factor <- function(a, min.a, max.a, mean.a){
  res <- (a - mean.a)/(max.a - min.a)
}

# calculate min, max and mean for all single factors (normalization constants)
```

```

factor.norm <- data.frame(min=apply(BDLdata, 2, min, na.rm=TRUE),
                          max=apply(BDLdata, 2, max, na.rm=TRUE),
                          mean=apply(BDLdata, 2, mean, na.rm=TRUE))
# function for normalizing subset of BDL data with factor normalization constants.
normalize_BDLdata <- function(data, factor.norm){
  dnorm <- data
  for (name in colnames(data)){
    dnorm[, name] <- normalize_factor(a=dnorm[, name],
                                     min.a=factor.norm[name, "min"],
                                     max.a=factor.norm[name, "max"],
                                     mean.a=factor.norm[name, "mean"])
  }
  return(dnorm)
}

# normalize full data set
BDLdata.norm <- normalize_BDLdata(data=BDLdata, factor.norm=factor.norm)
# Calculate the mean of the normalized data set
BDLmean.norm <- bdl_mean_data(BDLdata.norm, BDLsamples)

```

With the normalized factor data the mean time course of the 6 clusters are calculated, i.e. the time course resulting from averaging over all members of the individual clusters. Additionally, the mean time course averaged over the repeats for all factors are plotted.

```

# Plot mean cluster with SD range and the individual representatives in the cluster.
plot_clusters_mean <- function(method){
  # clusters for correlation method
  hc.res <- hclust.res[[method]]
  groups.hc.order <- hc.res$groups.hc.order

  # par(mfrow=c(ceiling(sqrt(Ngroups)),ceiling(sqrt(Ngroups))))
  par(mfrow=c(2,3))
  steps <- 1:Nt # time points
  for (k in 1:Ngroups){
    # get representatives of cluster
    g <- groups.hc.order[groups.hc.order==k]
    dgroup <- BDLmean.norm[names(g)] # normalized mean data for cluster members

    # mean and sd for timepoints (i.e. over all factors in the cluster)
    g.mean <- rowMeans(as.matrix(dgroup), na.rm=TRUE)
    g.sd <- rowSds(as.matrix(dgroup), na.rm=TRUE)

    # plot sd range
    plot(factor(levels(BDLsamples$time_fac), levels=levels(BDLsamples$time_fac)),
         rep(-2, 8), type="n", xlab="", ylab="",
         xlim=c(1, Nt), ylim=1.1*c( min(min(dgroup, na.rm=TRUE), na.rm=TRUE),
                                   max(max(dgroup, na.rm=TRUE), na.rm=TRUE) ),
         main=sprintf("%s : Cluster %s (N=%s)", method, k, ncol(dgroup)))
    polygon(c(steps, rev(steps)), c(g.mean+g.sd, rev(g.mean-g.sd)),
           col = rgb(0,0,1,0.2), border = NA)

    # individual data
    for (name in names(g)){

```

```

points(steps, dgroup[, name], pch=16, col="black")
lines(steps, dgroup[, name], col=rgb(0.5,0.5,0.5,1.0), lwd=1)
}
# mean over factors in cluster
lines(steps, g.mean, col="blue", lwd=2)
}
par(mfrow=c(1,1))
}

# plot mean clusters to file
for (method in correlation_methods){
pdf(file.path(resultsPath, 'cluster', sprintf("%s_cluster_mean.pdf", method)),
width=10, height=7.5, pointsize=12)
plot_clusters_mean(method=method)
invisible(dev.off())
}

```

```
plot_clusters_mean(method="ys3")
```

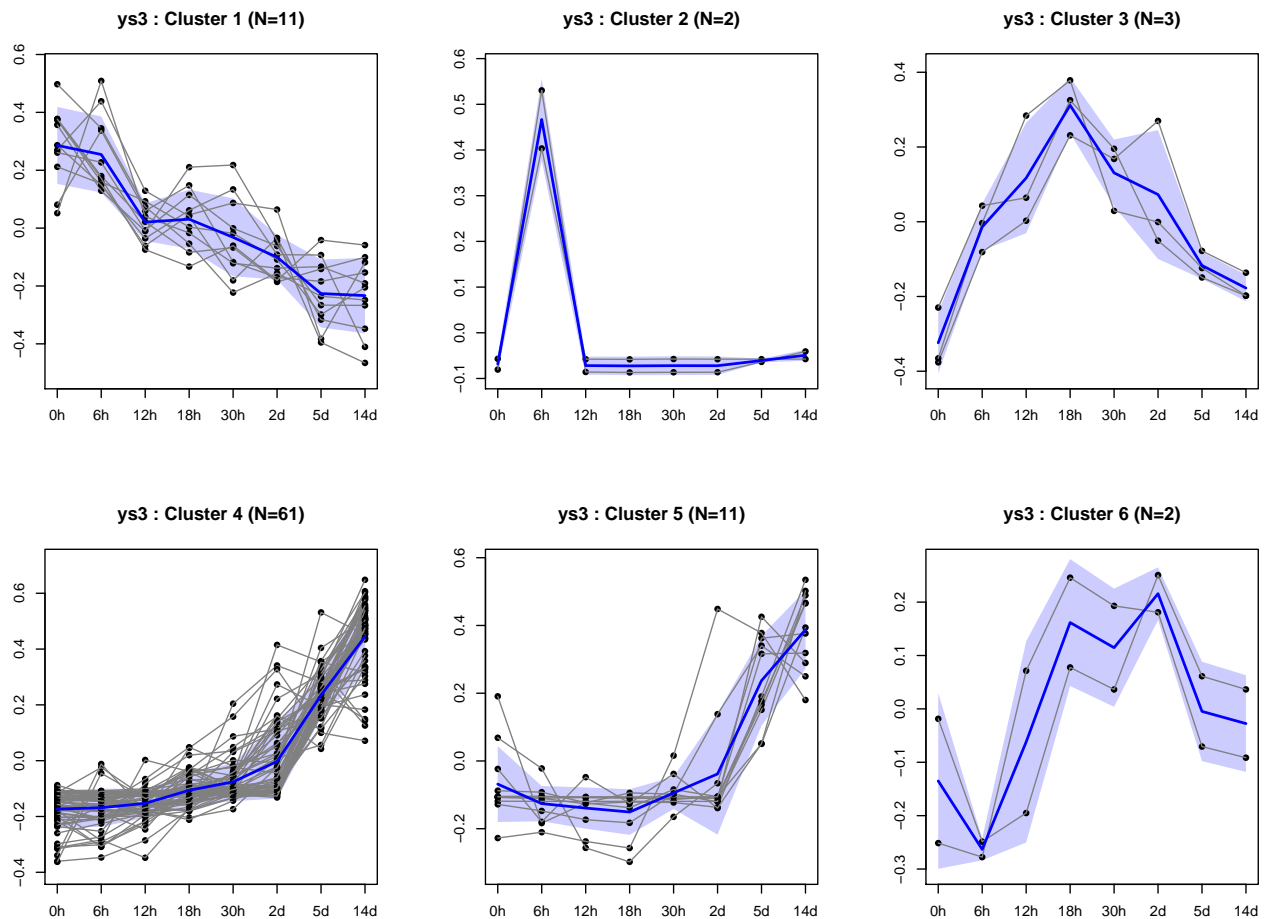

Figure: Mean cluster time courses. Mean time course of clusters in blue, with individual mean factors in cluster in grey. Standard deviation of members in cluster is added as gray shade.

In addition the plots of the individual factors in the clusters are generated. Despite being clustered together still quit large variance exists between the different factors in the clusters.

```

# Plot individual time courses in cluster
plot_clusters_items <- function(method, toFile=FALSE){
  # get the cluster assignment for the given method
  hc.res <- hclust.res[[method]]
  groups.hc.order <- hc.res$groups.hc.order

  for (k in 1:Ngroups){
    if (toFile==TRUE){
      pdf(file.path(resultsPath, "cluster", sprintf("%s_cluster_%s.pdf", method, k)),
          width=10, height=10, pointsize=8)
    }
    g <- groups.hc.order[groups.hc.order==k]
    N <- ceiling(sqrt(length(g)))
    par(mfrow=c(N,N))
    for (name in names(g)){
      plot_single(name_A=name)
    }
    par(mfrow=c(1,1))
    if (toFile==TRUE){
      invisible(dev.off())
    }
  }
}

# plot individual factors in clusters on disk
for (method in correlation_methods){
  plot_clusters_items(method=method, toFile=TRUE)
}
rm(method)

```

## Top cluster representatives

In this step, the top cluster representatives are calculated for all clusters. The higher the correlation between the factor and the cluster mean, the higher the respective factor is scored. The used correlation measure is YS3. The result are the correlation matrices for the individual clusters.

```

hmap_colors <- HeatmapColors()

# correlation between the cluster mean and cluster members
calculate_cluster_correlations <- function(method="ys3"){
  if (!identical(method, "ys3")){
    stop("Only ys3 top correlation is currently supported")
  }
  # get the clusters
  hc.res <- hclust.res[[method]]
  groups.hc.order <- hc.res$groups.hc.order
  # mean cluster time course as additional factor
  name_cluster <- sprintf("cluster.mean")

  # calculate top correlations for every cluster
  cluster.cor <- vector("list", length=Ngroups)
  for (k in 1:Ngroups){
    # get members of cluster

```

```

g <- groups.hc.order[groups.hc.order==k]
# get normalized data for members of cluster
dgroup <- BDLdata.norm[names(g)]
# cluster mean and add as factor (mean of all factors in cluster
# for given time point and sample)
g.mean <- rowMeans(as.matrix(dgroup), na.rm=TRUE)
dgroup[[name_cluster]] <- g.mean
# mean averaged over repeats (for A** and M*)
dgroup.mean <- bdl_mean_data(dgroup, BDLsamples)
# ys3 correlation for created data.frame with mean cluster factor
ysr.res <- ysr.matrices(dgroup.mean, BDLmean.time, use="pairwise.complete.obs")
# Spearman correlation on individual data points
cor.S_star <- ( cor(dgroup, method="spearman", use="pairwise.complete.obs") + 1 )/2
# YS3 in [-1,1]
ys3 <- 2*( (w$w1*cor.S_star + w$w2*ysr.res$A_star2 + w$w3*ysr.res$M_star) - 0.5)
# store correlation matrix
cluster.cor[[k]] <- ys3
}
return(cluster.cor)
}
cluster.cor <- calculate_cluster_correlations(method="ys3")

```

```

# plot correlations for individual clusters
for (k in 1:Ngroups){
cluster.cor.mat <- cluster.cor[[k]]
if (ncol(cluster.cor.mat)<20){
corrplot(cluster.cor.mat, method="pie", type="full",
main=sprintf("Cluster %s", k),
tl.cex=0.8, tl.col="black", col=hmap_colors(100),
insig="p-value", sig.level=-1, p.mat=cluster.cor.mat,
cl.pos="n")
} else {
corrplot(cluster.cor.mat, method="circle", type="full",
main=sprintf("Cluster %s", k),
tl.cex=0.8, tl.col="black", col=hmap_colors(100),
cl.pos="n")
}
}
rm(k, cluster.cor.mat)

```

From the cluster correlation matrices the top correlations between cluster mean and the members of the respective cluster can be extracted.

```

plot_top_cluster_representatives <- function(method="ys3", Ntop=11, labels=TRUE){
par(mfrow=c(Ngroups,1))
name_cluster <- sprintf("cluster.mean")
for (k in 1:Ngroups){
# YS3 in [-1,1]
ys3 <- cluster.cor[[k]]

# correlation for the cluster mean
v <- ys3[, which(colnames(ys3)==name_cluster)]
# sort by absolute correlation

```



```

v.sorted <- rev(v[order(abs(v))])

# reduce to Ntop candidates and fill short clusters with zeros tto Ntop
if (length(v.sorted)>=(Ntop+1)){
  v.sorted <- v.sorted[2:(Ntop+1)]
} else {
  v.sorted <- c(v.sorted[2:length(v.sorted)], rep(0,Ntop-length(v.sorted)+1))
}
# prepare data for corrplot
mv <- t(as.matrix(v.sorted))
rownames(mv) <- c(paste(name_cluster, k))
if (labels == FALSE){
  colnames(mv) <- NULL
}
corrplot(mv, method="pie", type="full",
         tl.cex=1.0, tl.col="black", col=hmap_colors(100),
         insig="p-value", sig.level=-1, p.mat=mv,
         cl.pos="n")
}
par(mfrow=c(1,1))
}

# plot to file (with and without names)
pdf(file.path(resultsPath, "cluster", "cluster_top_representatives_01.pdf"),
    width=5, height=5, pointsize=12)
plot_top_cluster_representatives(labels=FALSE)
invisible(dev.off())
pdf(file.path(resultsPath, "cluster", "cluster_top_representatives_02.pdf"),
    width=10, height=10, pointsize=12)
plot_top_cluster_representatives(labels=TRUE)
invisible(dev.off())

plot_top_cluster_representatives(labels=TRUE)

```

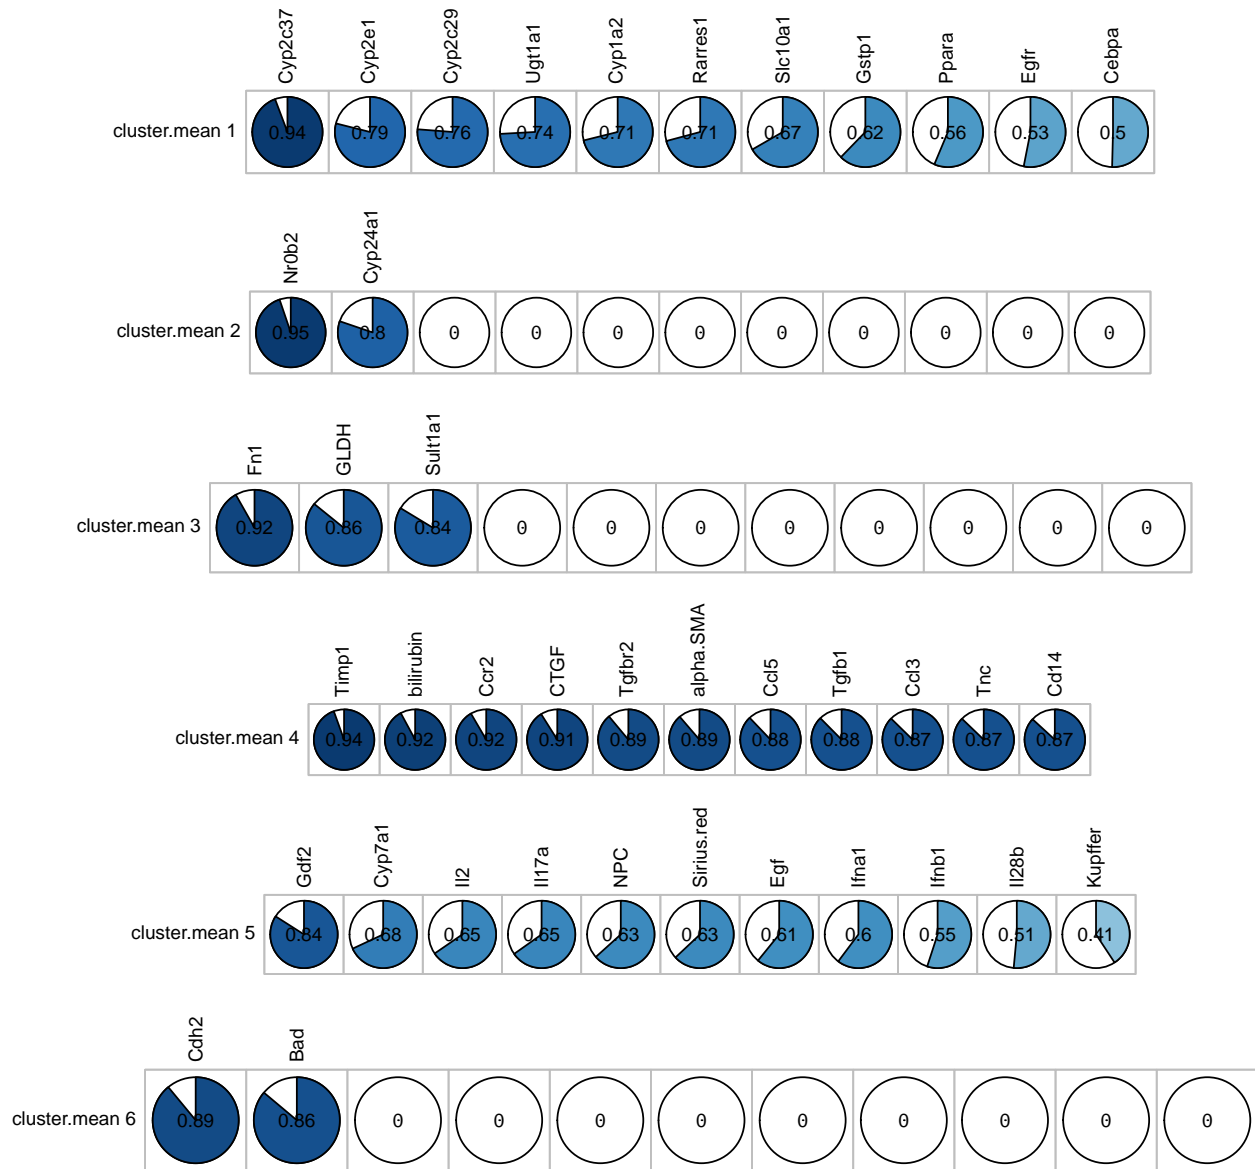

Figure: Top cluster correlations. Top correlations between the respective cluster mean and the members in the cluster sorted by absolute correlation.

## YS3 cluster summary

Overview over the members of the 6 clusters with respective YS3 correlation to the cluster mean and ANOVA result.

```
# print representatives of cluster
list_cluster_information <- function(method="ys3"){
  if(!identical(method, "ys3")){
    stop("Cluster correlation only calculated for ys3")
  }
  groups <- hclust.res[[method]]$groups
  cat(sprintf("-----\n"))
  cat(sprintf("Correlation method: *** %s ***\n", method))
}
```

```

cat(sprintf("-----\n"))
for (k in 1:Ngroups){
  cluster.cor.mat <- cluster.cor[[k]]
  # create data.frame with ANOVA & cluster correlation
  g <- groups[groups==k]
  cat(sprintf("Cluster %s (N=%s)\n", k, length(g)))
  Ng <- length(names(g))
  rows <- vector("list", length=Ng)
  for (kn in 1:Ng){
    name <- names(g)[kn]
    row <- df.anova[which(df.anova$factor==name),]
    row$cluster.cor <- cluster.cor.mat[name, "cluster.mean"]
    rows[[kn]] <- row
  }
  df <- do.call("rbind", rows)
  df <- df[order(-df$cluster.cor), ]

  # cleanup the data.frame
  rownames(df) <- df$factors
  df <- df[, c("p.holm", "sig.holm", "ftype", "fshort", "cluster.cor")]
  df$cluster.cor <- round(df$cluster.cor, digits=2)
  df$p.holm <- sprintf("%.2E", df$p.holm)
  print(df)

  cat("\n")
  # create list for figure legend
  # print(paste(sprintf("%s (%s)", rownames(df), df$cluster.cor),
  #               sep=" ", collapse=" "))
}
}

```

```

# List information in cluster
list_cluster_information(method="ys3")

```

```

-----
Correlation method: *** ys3 ***
-----

```

```

Cluster 1 (N=11)
  p.holm sig.holm      ftype fshort cluster.cor
Cyp2c37 1.09E-05    ***   GE_ADME      0.94
Cyp2e1  1.50E-06    ***  GE_Fibrosis  0.79
Cyp2c29 2.93E-06    ***   GE_ADME      0.76
Ugt1a1  2.75E-03    **    GE_ADME      0.74
Cyp1a2  2.93E-14    ***   GE_ADME      0.71
Rarres1 3.57E-02    *    GE_Fibrosis  0.71
Slc10a1 5.26E-05    ***   GE_ADME      0.67
Gstp1   1.38E-04    ***   GE_ADME      0.62
Ppara   1.63E-04    ***   GE_ADME      0.56
Egfr    1.59E-03    **  GE_Cytokines  0.53
Cebpa   4.93E-04    ***   GE_ADME      0.50

```

```

Cluster 2 (N=2)
  p.holm sig.holm      ftype fshort cluster.cor
Nr0b2   1.30E-07    ***  GE_ADME      0.95
Cyp24a1 9.88E-03    **   GE_ADME      0.80

```

## Cluster 3 (N=3)

|         | p.holm   | sig.holm | ftype        | fshort | cluster.cor |
|---------|----------|----------|--------------|--------|-------------|
| Fnl     | 1.21E-03 | **       | GE_Fibrosis  |        | 0.92        |
| GLDH    | 4.28E-03 | **       | Biochemistry | B      | 0.86        |
| Sult1a1 | 2.98E-03 | **       | GE_ADME      |        | 0.84        |

## Cluster 4 (N=61)

|               | p.holm   | sig.holm | ftype          | fshort | cluster.cor |
|---------------|----------|----------|----------------|--------|-------------|
| Timp1         | 4.30E-04 | ***      | GE_Fibrosis    |        | 0.94        |
| bilirubin     | 4.98E-12 | ***      | Biochemistry   | B      | 0.92        |
| Ccr2          | 6.94E-11 | ***      | GE_Cytokines   |        | 0.92        |
| CTGF          | 7.82E-10 | ***      | Histochemistry | H      | 0.91        |
| Tgfbr2        | 1.71E-07 | ***      | GE_Fibrosis    |        | 0.89        |
| alpha.SMA     | 5.02E-04 | ***      | Histochemistry | H      | 0.89        |
| Cc15          | 2.78E-07 | ***      | GE_Cytokines   |        | 0.88        |
| Tgfb1         | 3.30E-11 | ***      | GE_Cytokines   |        | 0.88        |
| Cc13          | 8.53E-06 | ***      | GE_Cytokines   |        | 0.87        |
| Tnc           | 2.04E-03 | **       | GE_Fibrosis    |        | 0.87        |
| Cd14          | 1.15E-05 | ***      | GE_Cytokines   |        | 0.87        |
| Cc12          | 3.46E-11 | ***      | GE_Cytokines   |        | 0.86        |
| Cd86          | 6.56E-11 | ***      | GE_Cytokines   |        | 0.86        |
| Pdgfb         | 7.68E-04 | ***      | GE_Fibrosis    |        | 0.86        |
| Col1a1        | 4.40E-07 | ***      | GE_Fibrosis    |        | 0.86        |
| Cxcl3         | 6.82E-05 | ***      | GE_Cytokines   |        | 0.86        |
| Cc14          | 1.04E-07 | ***      | GE_Cytokines   |        | 0.85        |
| Cxcl5         | 6.26E-10 | ***      | GE_Cytokines   |        | 0.85        |
| Il10ra        | 1.64E-09 | ***      | GE_Cytokines   |        | 0.85        |
| Col3a1        | 2.02E-05 | ***      | GE_Fibrosis    |        | 0.85        |
| Il10rb        | 1.15E-11 | ***      | GE_Cytokines   |        | 0.84        |
| Cc17          | 3.40E-08 | ***      | GE_Cytokines   |        | 0.82        |
| Cd69          | 2.73E-06 | ***      | GE_Cytokines   |        | 0.82        |
| Ifnar1        | 7.71E-07 | ***      | GE_Cytokines   |        | 0.82        |
| Tnf           | 4.36E-06 | ***      | GE_Cytokines   |        | 0.82        |
| Osm           | 7.51E-06 | ***      | GE_Cytokines   |        | 0.81        |
| Sparc         | 1.07E-06 | ***      | GE_Fibrosis    |        | 0.80        |
| Il6           | 2.23E-04 | ***      | GE_Cytokines   |        | 0.80        |
| Tnfrsf1b      | 7.89E-11 | ***      | GE_Cytokines   |        | 0.80        |
| Cxcr2         | 1.75E-06 | ***      | GE_Cytokines   |        | 0.78        |
| Il1b          | 7.29E-06 | ***      | GE_Cytokines   |        | 0.78        |
| Timp2         | 6.24E-05 | ***      | GE_Fibrosis    |        | 0.77        |
| Ifnar2        | 1.82E-04 | ***      | GE_Cytokines   |        | 0.77        |
| Ccr5          | 4.36E-08 | ***      | GE_Cytokines   |        | 0.77        |
| Il10          | 4.88E-05 | ***      | GE_Cytokines   |        | 0.76        |
| Osmr          | 1.01E-07 | ***      | GE_Cytokines   |        | 0.75        |
| Gsta2         | 3.88E-06 | ***      | GE_ADME        |        | 0.74        |
| Il4           | 4.88E-05 | ***      | GE_Cytokines   |        | 0.71        |
| Ifng          | 7.51E-06 | ***      | GE_Cytokines   |        | 0.71        |
| Cc18          | 1.23E-04 | ***      | GE_Cytokines   |        | 0.71        |
| Hgf           | 5.80E-08 | ***      | GE_Cytokines   |        | 0.70        |
| Bak1          | 2.73E-02 | *        | GE_Fibrosis    |        | 0.70        |
| Mrc1          | 6.95E-11 | ***      | GE_Cytokines   |        | 0.69        |
| Tgfb2         | 1.08E-02 | *        | GE_Fibrosis    |        | 0.69        |
| Ccr3          | 1.91E-06 | ***      | GE_Cytokines   |        | 0.68        |
| Actb.y        | 1.91E-02 | *        | GE_Cytokines   |        | 0.68        |
| S100a4        | 9.19E-07 | ***      | Histochemistry | H      | 0.66        |
| Il13          | 9.29E-06 | ***      | GE_Cytokines   |        | 0.66        |
| Met           | 4.97E-03 | **       | GE_Cytokines   |        | 0.66        |
| bile.infarcts | 3.78E-02 | *        | Histochemistry | H      | 0.65        |

|          |          |     |                |   |      |
|----------|----------|-----|----------------|---|------|
| Il6st    | 8.71E-04 | *** | GE_Cytokines   |   | 0.63 |
| Tnfrsf1a | 3.33E-05 | *** | GE_Cytokines   |   | 0.63 |
| Mki67    | 1.46E-03 | **  | GE_Fibrosis    |   | 0.62 |
| Birc5    | 1.69E-02 | *   | GE_Fibrosis    |   | 0.60 |
| Ctgf     | 1.32E-04 | *** | GE_Fibrosis    |   | 0.58 |
| BEC      | 2.09E-07 | *** | Histochemistry | H | 0.56 |
| Bax      | 2.89E-02 | *   | GE_Fibrosis    |   | 0.56 |
| Notch1   | 4.45E-03 | **  | GE_Fibrosis    |   | 0.54 |
| Cxcr1    | 1.07E-05 | *** | GE_Cytokines   |   | 0.51 |
| Gstm1    | 9.18E-09 | *** | GE_ADME        |   | 0.45 |
| Cdh1     | 4.48E-04 | *** | GE_Fibrosis    |   | 0.42 |

Cluster 5 (N=11)

|            | p.holm   | sig.holm | ftype          | fshort | cluster.cor |
|------------|----------|----------|----------------|--------|-------------|
| Gdf2       | 5.95E-06 | ***      | GE_Fibrosis    |        | 0.84        |
| Cyp7a1     | 9.83E-03 | **       | GE_ADME        |        | 0.68        |
| Il2        | 4.84E-05 | ***      | GE_Cytokines   |        | 0.65        |
| Il17a      | 2.43E-04 | ***      | GE_Cytokines   |        | 0.65        |
| NPC        | 5.28E-04 | ***      | Histochemistry | H      | 0.63        |
| Sirius.red | 7.59E-04 | ***      | Histochemistry | H      | 0.63        |
| Egf        | 4.88E-05 | ***      | GE_Cytokines   |        | 0.61        |
| Ifna1      | 1.46E-03 | **       | GE_Cytokines   |        | 0.60        |
| Ifnb1      | 4.86E-05 | ***      | GE_Cytokines   |        | 0.55        |
| Il28b      | 4.88E-05 | ***      | GE_Cytokines   |        | 0.51        |
| Kupffer    | 1.95E-03 | **       | Histochemistry | H      | 0.41        |

Cluster 6 (N=2)

|      | p.holm   | sig.holm | ftype       | fshort | cluster.cor |
|------|----------|----------|-------------|--------|-------------|
| Cdh2 | 5.38E-04 | ***      | GE_Fibrosis |        | 0.89        |
| Bad  | 3.84E-04 | ***      | GE_Fibrosis |        | 0.86        |

#

## Decision trees

For the prediction of disease progression after BDL a decision tree was used. The regression tree was fitted with the R package `rpart`, being the open-source implementation of CART, providing algorithms for recursive partitioning for classification following in most details closely Breiman et. al (1984) (*Breiman L., Friedman J. H., Olshen R. A., and Stone, C. J. (1984) Classification and Regression Trees. Wadsworth.*

The predictor variables are the 6 mean time courses of the clusters, the dependent variable is the log transformed time class (to get approximately equidistant intervals between the trainings classes in the regression models). The tree is built in a two-step process: First the single variable is found which best splits the data into two groups. The data than separated based on the split, and the splitting process is applied separately to each sub-group, and so on recursively until the subgroups either reach a minimum size (`minbucket`) or until no improvement can be made. The second stage of the procedure consists of using cross-validation to trim back the full tree. The splitting criterion, which is used to decide which variable gives the best split for nodes in the regression trees is  $SS_T - (SS_L + SS_R)$ , with  $SS_T = \sum (y_i - \bar{y})^2$  the sum of squares for the node and  $SS_R$  and  $SS_L$  the sums of squares for the left and right son. This is equivalent to choosing the split ot maximize the between-groups sum-of-squares in a simple analysis of variance (see *An Introduction to Recursive Partitioning Using the RPART Routines. T.M. Therneau and E.J. Atkinson, Mayo Foundation, 2015*). Two important parameters controlling the resulting tree are

- `minsplit` : The minimum number of observations in a node for which the routine will even try to compute a split. The default is 20 and is set to 6 in the tree calculation ( $N_r = 5$  repeats per time point).

- `minbucket` : The minimum number of observations in a terminal node. This defaults to `minsplit/3`.

```
suppressPackageStartupMessages(library(rpart))
suppressPackageStartupMessages(library(rpart.plot))
suppressPackageStartupMessages(library(caret))
dir.create(file.path(resultsPath, 'decision_tree'), showWarnings=FALSE)
```

To generate approximately equally distant time classes for training the regression tree the log transformed time values are used based on the transformation

$$\tilde{t}_i = \log(t_i + 1)$$

resulting in the following transformation of the time points

```
# transform data to log scale
log_transform <- function(data){
  log(data+1)
}
# back transformation
log_transform_back <- function(log_data){
  exp(log_data)-1
}
# resulting time transformations
time_transformation <- data.frame(time=BDLmean.time,
                                  log_time=log_transform(BDLmean.time))
print(round(time_transformation, 2))
```

|   | time | log_time |
|---|------|----------|
| 1 | 0    | 0.00     |
| 2 | 6    | 1.95     |
| 3 | 12   | 2.56     |
| 4 | 18   | 2.94     |
| 5 | 30   | 3.43     |
| 6 | 48   | 3.89     |
| 7 | 120  | 4.80     |
| 8 | 336  | 5.82     |

## Trainings data

In a first step the mean cluster trainings data for fitting the decision tree is prepared. The predictor variables are the mean samples of the clusters, the dependent variable is the log transformed time of the respective sample. The trainings set consists of the  $N_t * N_r = 40$  samples.

```
prepare_treedata_mean <- function(method="ys3"){
  # Hierarchical clusters based on ys3 to fit the regression tree
  hc.res <- hclust.res[[method]]
  groups <- hc.res$groups

  # Prepare training set for fitting the decision trees (mean cluster data set,
  # i.e. mean over normalized factors in cluster).
  na.vec <- rep(NA, Nt*Nr)
  treedata.mean <- data.frame(c1=na.vec, c2=na.vec, c3=na.vec,
```

```

                                c4=na.vec, c5=na.vec, c6=na.vec)
# for every sample
for (ks in 1:(Nt*Nr)){
  # create the mean over the cluster
  for (kgroup in 1:Ngroups){
    # get factors in the cluster
    factors <- names(groups[groups==kgroup])
    # calculate mean over normalized data
    treedata.mean[ks, kgroup] <- mean(as.numeric(BDLdata.norm[ks, factors]), na.rm=TRUE)
  }
}
# add log transformed time [h] for regression
treedata.mean$logtime <- log_transform(BDLsamples$time)
# add experimental time class
treedata.mean$class <- BDLsamples$time_fac
return(treedata.mean)
}
treedata.mean <- prepare_treedata_mean()

# save the trainings data
save(treedata.mean, file=file.path(resultsPath, "data", "treedata.mean.Rdata"))

```

In the following an overview over the resulting trainings data set is given

```

# mean cluster data set for model fitting
options(width=200)
print(round(treedata.mean[, -8], digits=2))

```

|    | c1    | c2    | c3    | c4    | c5    | c6    | logtime |
|----|-------|-------|-------|-------|-------|-------|---------|
| 1  | 0.22  | -0.07 | -0.36 | -0.14 | -0.11 | -0.03 | 0.00    |
| 2  | 0.50  | -0.06 | -0.29 | -0.14 | -0.07 | -0.07 | 0.00    |
| 3  | 0.26  | -0.07 | -0.32 | -0.19 | -0.10 | -0.17 | 0.00    |
| 4  | 0.34  | -0.07 | -0.31 | -0.19 | -0.04 | -0.23 | 0.00    |
| 5  | 0.12  | -0.07 | -0.33 | -0.19 | -0.02 | -0.18 | 0.00    |
| 6  | 0.31  | 0.69  | -0.01 | -0.17 | -0.09 | -0.29 | 1.95    |
| 7  | 0.21  | 0.93  | -0.02 | -0.18 | -0.13 | -0.36 | 1.95    |
| 8  | 0.24  | 0.27  | 0.03  | -0.18 | -0.15 | -0.30 | 1.95    |
| 9  | 0.19  | 0.12  | 0.05  | -0.15 | -0.14 | -0.25 | 1.95    |
| 10 | 0.33  | 0.33  | -0.12 | -0.14 | -0.11 | -0.12 | 1.95    |
| 11 | 0.01  | -0.07 | 0.23  | -0.13 | -0.15 | -0.01 | 2.56    |
| 12 | 0.08  | -0.07 | 0.01  | -0.15 | -0.11 | -0.07 | 2.56    |
| 13 | -0.07 | -0.07 | 0.12  | -0.17 | -0.15 | -0.18 | 2.56    |
| 14 | 0.07  | -0.07 | 0.09  | -0.15 | -0.14 | 0.03  | 2.56    |
| 15 | 0.01  | -0.07 | 0.13  | -0.15 | -0.15 | -0.08 | 2.56    |
| 16 | 0.13  | -0.07 | 0.30  | -0.05 | -0.16 | 0.17  | 2.94    |
| 17 | -0.03 | -0.07 | 0.39  | -0.12 | -0.15 | 0.24  | 2.94    |
| 18 | 0.02  | -0.07 | 0.22  | -0.13 | -0.15 | 0.07  | 2.94    |
| 19 | 0.02  | -0.07 | 0.43  | -0.07 | -0.15 | 0.20  | 2.94    |
| 20 | 0.01  | -0.07 | 0.22  | -0.15 | -0.14 | 0.12  | 2.94    |
| 21 | 0.05  | -0.07 | -0.01 | -0.09 | -0.04 | 0.14  | 3.43    |
| 22 | -0.02 | -0.07 | -0.03 | -0.07 | -0.10 | 0.08  | 3.43    |
| 23 | -0.11 | -0.07 | 0.41  | -0.11 | -0.16 | 0.03  | 3.43    |
| 24 | -0.11 | -0.07 | 0.13  | -0.03 | -0.12 | 0.09  | 3.43    |
| 25 | 0.03  | -0.07 | 0.17  | -0.08 | -0.05 | 0.23  | 3.43    |
| 26 | -0.13 | -0.07 | 0.01  | 0.02  | -0.04 | 0.11  | 3.89    |
| 27 | -0.17 | -0.07 | 0.26  | 0.13  | 0.00  | 0.43  | 3.89    |

|    |       |       |       |       |       |       |      |
|----|-------|-------|-------|-------|-------|-------|------|
| 28 | -0.09 | -0.07 | -0.15 | 0.00  | -0.04 | 0.28  | 3.89 |
| 29 | -0.08 | -0.07 | 0.12  | -0.11 | -0.14 | 0.15  | 3.89 |
| 30 | -0.03 | -0.07 | 0.12  | -0.08 | -0.02 | 0.12  | 3.89 |
| 31 | -0.23 | -0.07 | -0.27 | -0.01 | 0.14  | -0.09 | 4.80 |
| 32 | -0.26 | -0.07 | 0.11  | 0.27  | 0.17  | 0.27  | 4.80 |
| 33 | -0.28 | -0.07 | -0.27 | 0.29  | 0.19  | -0.13 | 4.80 |
| 34 | -0.26 | -0.07 | -0.23 | 0.28  | 0.23  | -0.13 | 4.80 |
| 35 | -0.10 | -0.01 | 0.07  | 0.33  | 0.44  | 0.06  | 4.80 |
| 36 | -0.16 | 0.03  | -0.17 | 0.45  | 0.44  | -0.06 | 5.82 |
| 37 | -0.22 | -0.06 | -0.14 | 0.64  | 0.49  | -0.01 | 5.82 |
| 38 | -0.23 | -0.07 | -0.13 | 0.23  | 0.26  | -0.07 | 5.82 |
| 39 | -0.24 | -0.07 | -0.17 | 0.54  | 0.44  | 0.12  | 5.82 |
| 40 | -0.32 | -0.07 | -0.27 | 0.36  | 0.30  | -0.11 | 5.82 |

```
options(width=75)
```

## Fit regression tree

Here the regression tree is fitted (log transformed time ~ mean cluster data for the time points c1, c2, c3, c4, c5, c6). Control parameters for rpart are `minsplit=6` and `minbucket=2` to account for the low number of samples (N=40). In the following the regression tree is fitted and the information for the resulting tree is provided.

```
# formula for regression tree
formula.reg = paste("logtime ~ c1 + c2 + c3 + c4 + c5 + c6")

# fit regression tree with mean cluster data
tree.reg <- rpart(formula=formula.reg,
                  data=treedata.mean,
                  method="anova",
                  control=rpart.control(minsplit=6, minbucket=2, cp=0.01))

# pretty plot of tree to file
pdf(file.path(resultsPath, 'decision_tree', "regression_tree.pdf"),
     width=10, height=5, pointsize=12)
prp(tree.reg, type=0, extra=101, yesno=TRUE)
invisible(dev.off())
```

```
# plot of regression tree
prp(tree.reg, type=0, extra=101, yesno=TRUE)
```

```
# visualize cross-validation results
# rsq.rpart(tree.reg)
```

Figure: Regression tree on mean clusters. Fitted regression tree on the mean cluster data, predicting the log time classes. Splitting points are on the mean cluster values.

Detailed information about the fitted tree is provided below

```
# detailed overview of the resulting tree
options(width=200)
print(tree.reg)
```

n= 40



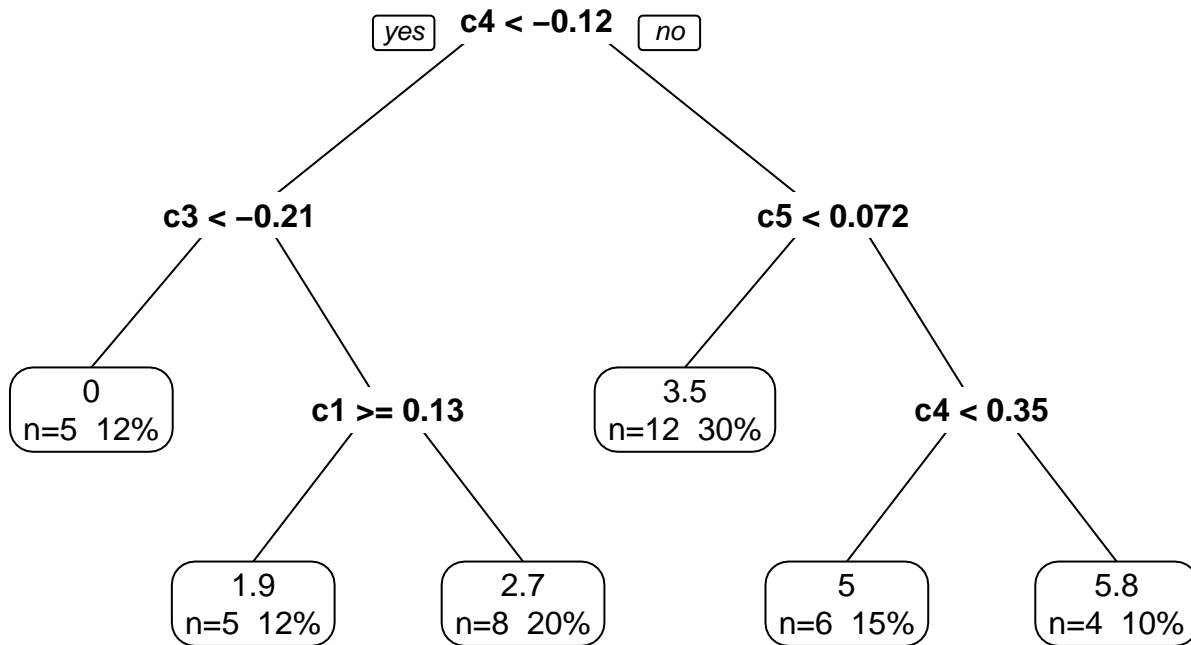

Figure 1: Figure: Regression tree on mean clusters. Fitted regression tree on the mean cluster data, predicting the log time classes. Splitting points are on the mean cluster values.

```
node), split, n, deviance, yval
* denotes terminal node
```

```
1) root 40 1.111047e+02 3.174622
2) c4< -0.1174939 18 2.310447e+01 1.743756
4) c3< -0.2081362 5 0.000000e+00 0.000000 *
5) c3>=-0.2081362 13 2.053563e+00 2.414432
10) c1>=0.1331057 5 2.465190e-31 1.945910 *
11) c1< 0.1331057 8 2.700232e-01 2.707258 *
3) c4>=-0.1174939 22 2.099513e+01 4.345331
6) c5< 0.07192204 12 1.384347e+00 3.543160 *
7) c5>=0.07192204 10 2.622937e+00 5.307937
14) c4< 0.3463259 6 8.743124e-01 4.966506 *
15) c4>=0.3463259 4 0.000000e+00 5.820083 *
```

```
summary(tree.reg)
```

```
Call:
rpart(formula = formula.reg, data = treedata.mean, method = "anova",
      control = rpart.control(minsplit = 6, minbucket = 2, cp = 0.01))
n = 40
```

| CP | nsplit     | rel error | xerror     | xstd       |
|----|------------|-----------|------------|------------|
| 1  | 0.60308067 | 0         | 1.00000000 | 1.02423310 |
| 2  | 0.18946910 | 1         | 0.39691933 | 0.43756577 |
| 3  | 0.15289945 | 2         | 0.20745023 | 0.26253022 |
| 4  | 0.01605279 | 3         | 0.05455078 | 0.06328074 |
| 5  | 0.01573853 | 4         | 0.03849799 | 0.07744295 |
| 6  | 0.01000000 | 5         | 0.02275946 | 0.04970344 |

```
Variable importance
c4 c5 c1 c3 c6 c2
27 19 19 15 12 8
```

```
Node number 1: 40 observations, complexity param=0.6030807
mean=3.174622, MSE=2.777617
left son=2 (18 obs) right son=3 (22 obs)
Primary splits:
c4 < -0.1174939 to the left, improve=0.6030807, (0 missing)
c1 < -0.07537026 to the right, improve=0.5729499, (0 missing)
c5 < -0.008508656 to the left, improve=0.5487412, (0 missing)
c3 < -0.2829117 to the left, improve=0.5183388, (0 missing)
c6 < -0.149531 to the left, improve=0.3184694, (0 missing)
Surrogate splits:
c1 < -0.07537026 to the right, agree=0.850, adj=0.667, (0 split)
c5 < -0.0625688 to the left, agree=0.800, adj=0.556, (0 split)
c6 < -0.149531 to the left, agree=0.750, adj=0.444, (0 split)
c2 < 0.07279386 to the right, agree=0.675, adj=0.278, (0 split)
c3 < -0.2829117 to the left, agree=0.675, adj=0.278, (0 split)
```

```
Node number 2: 18 observations, complexity param=0.1894691
mean=1.743756, MSE=1.283582
left son=4 (5 obs) right son=5 (13 obs)
Primary splits:
c3 < -0.2081362 to the left, improve=0.9111184, (0 missing)
```

```

c5 < -0.1122942 to the right, improve=0.5991729, (0 missing)
c1 < 0.09730379 to the right, improve=0.5785906, (0 missing)
c4 < -0.1838753 to the left, improve=0.4737815, (0 missing)
c6 < -0.01908181 to the left, improve=0.3296556, (0 missing)
Surrogate splits:
c4 < -0.1838753 to the left, agree=0.889, adj=0.6, (0 split)
c5 < -0.1122942 to the right, agree=0.889, adj=0.6, (0 split)
c1 < 0.3351088 to the right, agree=0.833, adj=0.4, (0 split)

Node number 3: 22 observations, complexity param=0.1528994
mean=4.345331, MSE=0.9543241
left son=6 (12 obs) right son=7 (10 obs)
Primary splits:
c5 < 0.07192204 to the left, improve=0.8091327, (0 missing)
c4 < 0.1840943 to the left, improve=0.7540271, (0 missing)
c1 < -0.1437557 to the right, improve=0.6642991, (0 missing)
c3 < -0.08194432 to the right, improve=0.6127738, (0 missing)
c6 < 0.007982308 to the right, improve=0.5246106, (0 missing)
Surrogate splits:
c4 < 0.1840943 to the left, agree=0.955, adj=0.9, (0 split)
c1 < -0.1936876 to the right, agree=0.909, adj=0.8, (0 split)
c3 < -0.08194432 to the right, agree=0.864, adj=0.7, (0 split)
c6 < 0.007982308 to the right, agree=0.864, adj=0.7, (0 split)
c2 < -0.07256249 to the right, agree=0.727, adj=0.4, (0 split)

Node number 4: 5 observations
mean=0, MSE=0

Node number 5: 13 observations, complexity param=0.01605279
mean=2.414432, MSE=0.1579664
left son=10 (5 obs) right son=11 (8 obs)
Primary splits:
c1 < 0.1331057 to the right, improve=0.8685099, (0 missing)
c2 < 0.02364916 to the right, improve=0.8685099, (0 missing)
c3 < 0.06868251 to the left, improve=0.7242745, (0 missing)
c6 < -0.09746977 to the left, improve=0.7242745, (0 missing)
c5 < -0.1383548 to the right, improve=0.4701461, (0 missing)
Surrogate splits:
c2 < 0.02364916 to the right, agree=1.000, adj=1.0, (0 split)
c3 < 0.06868251 to the left, agree=0.923, adj=0.8, (0 split)
c6 < -0.2167742 to the left, agree=0.923, adj=0.8, (0 split)
c4 < -0.153395 to the left, agree=0.846, adj=0.6, (0 split)
c5 < -0.1383548 to the right, agree=0.846, adj=0.6, (0 split)

Node number 6: 12 observations
mean=3.54316, MSE=0.1153623

Node number 7: 10 observations, complexity param=0.01573853
mean=5.307937, MSE=0.2622937
left son=14 (6 obs) right son=15 (4 obs)
Primary splits:
c4 < 0.3463259 to the left, improve=0.6666667, (0 missing)
c5 < 0.2491244 to the left, improve=0.6666667, (0 missing)
c6 < -0.1217972 to the left, improve=0.2500000, (0 missing)
c3 < -0.0328633 to the right, improve=0.2500000, (0 missing)
c1 < -0.247735 to the left, improve=0.1666667, (0 missing)
Surrogate splits:
c5 < 0.2821139 to the left, agree=0.9, adj=0.75, (0 split)
c1 < -0.2249667 to the left, agree=0.7, adj=0.25, (0 split)
c2 < -0.06371928 to the left, agree=0.7, adj=0.25, (0 split)
c3 < -0.1376999 to the right, agree=0.7, adj=0.25, (0 split)
c6 < -0.06444851 to the left, agree=0.7, adj=0.25, (0 split)

Node number 10: 5 observations
mean=1.94591, MSE=4.930381e-32

Node number 11: 8 observations
mean=2.707258, MSE=0.0337529

Node number 14: 6 observations
mean=4.966506, MSE=0.1457187

Node number 15: 4 observations
mean=5.820083, MSE=0

```

```
printcp(tree.reg)
```

```

Regression tree:
rpart(formula = formula.reg, data = treedata.mean, method = "anova",
control = rpart.control(minsplit = 6, minbucket = 2, cp = 0.01))

```

```

Variables actually used in tree construction:
[1] c1 c3 c4 c5

```

```
Root node error: 111.1/40 = 2.7776
```

```
n= 40
```

|   | CP       | nsplit | rel error | xerror   | xstd      |
|---|----------|--------|-----------|----------|-----------|
| 1 | 0.603081 | 0      | 1.000000  | 1.024233 | 0.2054524 |
| 2 | 0.189469 | 1      | 0.396919  | 0.437566 | 0.0624387 |
| 3 | 0.152899 | 2      | 0.207450  | 0.262530 | 0.0515831 |
| 4 | 0.016053 | 3      | 0.054551  | 0.063281 | 0.0083633 |
| 5 | 0.015739 | 4      | 0.038498  | 0.077443 | 0.0136864 |
| 6 | 0.010000 | 5      | 0.022759  | 0.049703 | 0.0139095 |

```
tree.reg$frame
```

|   | var | n  | wt | dev          | yval     | complexity  | ncompete | nsurrogate |
|---|-----|----|----|--------------|----------|-------------|----------|------------|
| 1 | c4  | 40 | 40 | 1.111047e+02 | 3.174622 | 0.603080672 | 4        | 5          |

```

2      c3 18 18 2.310447e+01 1.743756 0.189469098      4      3
4 <leaf> 5 5 0.000000e+00 0.000000 0.010000000      0      0
5      c1 13 13 2.053563e+00 2.414432 0.016052788      4      5
10 <leaf> 5 5 2.465190e-31 1.945910 0.010000000      0      0
11 <leaf> 8 8 2.700232e-01 2.707258 0.010000000      0      0
3      c5 22 22 2.099513e+01 4.345331 0.152899447      4      5
6 <leaf> 12 12 1.384347e+00 3.543160 0.007176239      0      0
7      c4 10 10 2.622937e+00 5.307937 0.015738533      4      5
14 <leaf> 6 6 8.743124e-01 4.966506 0.010000000      0      0
15 <leaf> 4 4 0.000000e+00 5.820083 0.010000000      0      0

```

```
options(width=75)
```

Only a subset of all mean clusters is used in the regression tree:

```

# variables used for splitting in the decision tree
tree.nodes <- (tree.reg$frame)$var
tree.nodes <- tree.nodes[tree.nodes != "<leaf>"]
tree.vars <- as.character(sort(unique(tree.nodes)))
rm(tree.nodes)
# variables used for splitting decisions in tree
print(tree.vars)

```

```
[1] "c1" "c3" "c4" "c5"
```

## Leave-one-out cross validation

A leave-one-out approach was used to test the robustness of the predicted time classes and predictive performance: For each sample ( $N_s = 40$  mice), the regression tree was generated under the exclusion of data from the sample, with subsequent prediction on the left out test data

```

# in total 40 cross validations (individual mice are not followed through time)
trees.test <- vector("list", length=Nr*Nt) # fitted trees
pred.test.log <- rep(NA, length=Nr*Nt)
for (k in 1:(Nr*Nt)){
  # delete the k index
  idx.subset <- 1:(Nr*Nt)
  idx.subset <- idx.subset[-k]

  # fit tree with the subset
  t.test <- rpart(formula=formula.reg,
                 data=treedata.mean[idx.subset, ],
                 method="anova",
                 control=rpart.control(minsplit=6, minbucket=2, cp=0.01))
  trees.test[[k]] <- t.test

  # prediction on left out sample
  pred.test.log[k] <- predict(t.test, newdata=treedata.mean[k,], type="vector")
}
# transformation to time in [h]
pred.test <- log_transform_back( pred.test.log )

plot_cross_validation <- function(){
  # plot the log prediction and error
  par(mfrow=c(1,2))
  plot(log_transform(BDLsamples$time), log_transform(pred.test),
       main="Leave one out cross validation",

```

```

xlim=c(0,7), ylim=c(0,7),
xlab="log(time_exp)",
ylab="log(time_pre)")
abline(a=0, b=1, col="gray")
textxy(log_transform(BDLsamples$time), log_transform(pred.test),
       1:(Nr*Nt), col="black", cex=0.6)

plot(log_transform(BDLsamples$time),
     log_transform(BDLsamples$time)-log_transform(pred.test),
     main="Prediction error",
     xlab="log(time_exp)",
     ylab="log(time_exp)-log(time_pre)",
     xlim=c(0,7), ylim=c(-1.5, 1.5))
abline(a=0, b=0, col="gray")
textxy(log_transform(BDLsamples$time),
       log_transform(BDLsamples$time)-log_transform(pred.test),
       1:(Nr*Nt), col="black", cex=0.6)
par(mfrow=c(1,1))
}

```

```
plot_cross_validation()
```

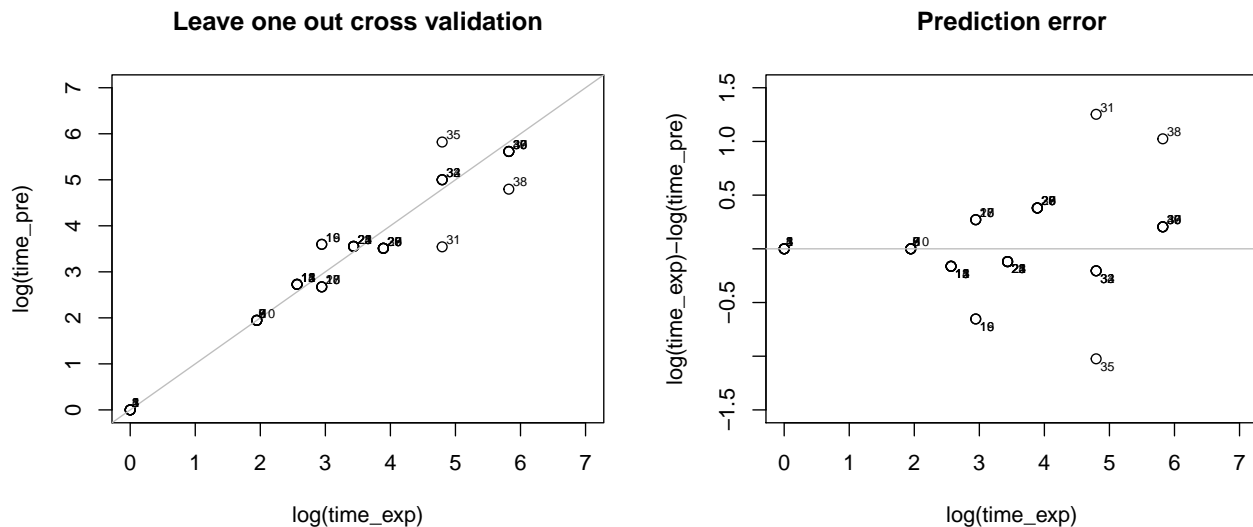

Figure: Cross validation predictions. Predictions on the left out data set with the fitted tree.

*Results:* All time points of the left-out data are predicted close to their actual time.

## Prediction on trainings data

Predict data with the tree: Here the time class leaves based on the mean cluster data. The regression tree predicts log classes, which are back-transformed to time in [h]. Here we test how good the tree performing on the trainings data set, i.e. the mean cluster data. Predictions are evaluated based on the distance between the predicted and the experimental time classes based on the following distance measure on log scale

```

# L2 (euclidian) distance measurement on the log transformed data.
# Analog to the distance measurement in fitting the regression tree.
log_distance <- function(d1, d2){

```

```

# sums over all the distances of the samples in log space
log_rmsd <- sqrt(sum( (log_transform(d1)-log_transform(d2) )^2 ))/length(d1)
return(log_rmsd)
}

```

Prediction on trainings data

```

# mean cluster predictions
pred.mean.log <- predict(tree.reg, newdata=treedata.mean, type="vector")
# transformation to time in [h]
pred.mean <- log_transform_back( pred.mean.log )

# Distance calculation (predicted to experimental)
dist.mean.all <- treedata.mean$logtime - pred.mean.log
dist.mean <- log_distance(pred.mean, BDLsamples$time)

# plot predicted ~ experimentell
plot_mean_prediction <- function(){
  par(mfrow=c(1,2))
  plot(BDLsamples$time, pred.mean, pch=15, col=rgb(0,0,1, 0.2),
       main="Regression Tree:\nPredicted ~ experimentell time",
       xlab="experimentell time [h]", ylab="predicted time [h]")
  abline(a=0, b=1, col=rgb(0.5,0.5,0.5,0.5))
  hist(dist.mean.all, breaks=seq(from=-1.05, to=1.05, by=0.1),
       main="Histogram prediction error:\nmean cluster data",
       col=rgb(0.5,0.5,0.5,0.5),
       xlab="logtime(exp)-logtime(pred)")
  par(mfrow=c(1,1))
}
# plot to file
pdf(file.path(resultsPath, 'decision_tree', "prediction_mean.pdf"),
    width=10, height=5, pointsize=12)
plot_mean_prediction()
invisible(dev.off())

```

```
plot_mean_prediction()
```

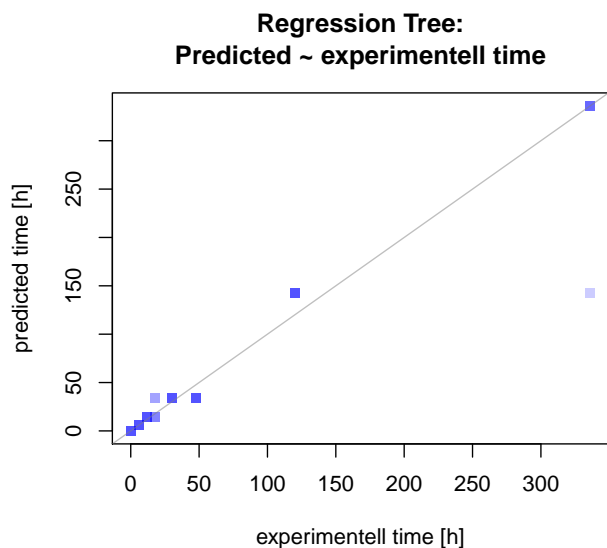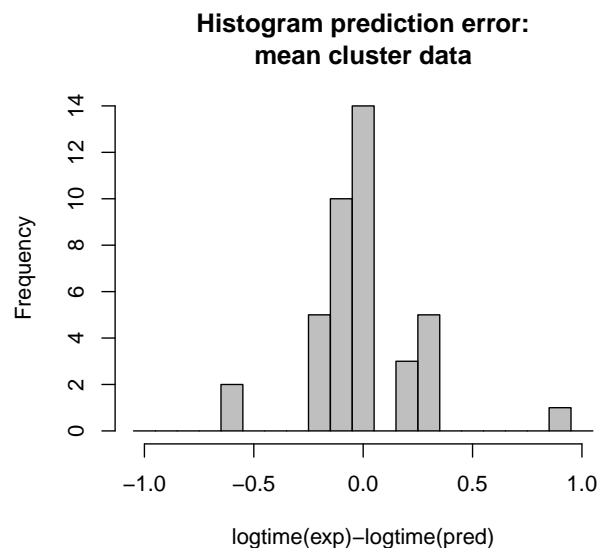

Figure: Predictions on mean cluster data. Predictions using the mean cluster data. This is the trainings data and results in the best performing tree.

The ranges of the predicted classes by the regression trees can be calculated based on the split points on log scale. These provides the information which time points would be classified in which class in the regression tree.

```
calculate_node_ranges <- function(){
  # classes via predicted classes for cluster data
  node_levels <- levels(as.factor(pred.mean))
  # These are the predicted classes
  node_classes <- round(as.numeric(node_levels), digits=1)

  # get the intervals of the time classes
  node_mean <- as.numeric(levels(as.factor(pred.mean.log)))
  node_midpoints <- (node_mean[2:length(node_mean)]+node_mean[1:(length(node_mean)-1)])/2
  # minimum of range
  node_min <- node_mean
  node_min[2:length(node_min)] <- node_midpoints
  # maximum of range
  node_max <- node_mean
  node_max[1:(length(node_min)-1)] <- node_midpoints
  # ranges in log scale
  node_ranges.log <- data.frame(node_mean, node_min, node_max)

  node_ranges <- data.frame(mean=log_transform_back(node_mean),
                           min=log_transform_back(node_min),
                           max=log_transform_back(node_max))
  rownames(node_ranges) <- paste("class", 1:nrow(node_ranges))
  return(node_ranges)
}

# predicted time classes by decision tree
node_ranges <- calculate_node_ranges()
print(round(node_ranges, digits=1))
```

|         | mean  | min   | max   |
|---------|-------|-------|-------|
| class 1 | 0.0   | 0.0   | 1.6   |
| class 2 | 6.0   | 1.6   | 9.2   |
| class 3 | 14.0  | 9.2   | 21.8  |
| class 4 | 33.6  | 21.8  | 69.4  |
| class 5 | 142.5 | 69.4  | 218.9 |
| class 6 | 336.0 | 218.9 | 336.0 |

## Test data for evaluation

### Single factor per cluster

Now the data set consisting of all single factor combinations from the clusters is created. These are used to evaluate the fitted regression tree.

```
# names of factors in the clusters
cluster_names <- paste('c', 1:Ngroups, sep="")
```

```

cluster.factors <- vector("list", length=Ngroups)
groups <- (hclust.res$ys3)$groups # get the ys3 groups
for (k in 1:Ngroups){
  cluster.factors[[k]] <- as.character(names(groups[groups==k]))
}
names(cluster.factors) <- cluster_names

# create data.frame of all single combinations from clusters
single.combinations <- expand.grid(cluster.factors, stringsAsFactors=TRUE)
names(single.combinations) <- names(cluster.factors)
# number of single combinations
Nsingle <- nrow(single.combinations)

# create all single factor data
print("Calculating single factor data (~ 3min) ... ")

```

```
[1] "Calculating single factor data (~ 3min) ... "
```

```

ptm <- proc.time()
treedata.single <- vector("list", Nsingle) # list for all combinations
for (k in 1:Nsingle){
  # -----
  # THIS HAS TO BE FAST (<0.005 s)
  # -----
  # ptm <- proc.time() # Start the clock!
  # get factor data
  tmp <- BDLdata.norm[, t(single.combinations[k, ])]
  # add regression values
  tmp[c("class", "logtime")] <- treedata.mean[ c("class", "logtime")]
  # add factor fields
  tmp[, paste(cluster_names, '.id', sep="")] <- single.combinations[k,]
  colnames(tmp) <- c(cluster_names, 'class', 'logtime', paste(cluster_names, '.id', sep=""))
  # store data
  treedata.single[[k]] <- tmp
  # if (k%500 == 0){print(k)}
  # print(proc.time()-ptm) # Stop the clock
}
# Stop the clock
rm(tmp,k)
print(proc.time() - ptm)

```

```

user system elapsed
121.133 0.132 121.277

```

```

# which factor combinations only use genes
factor_is_gene <- BDLfactors$type %in% c("GE_ADME", "GE_Cytokines", "GE_Fibrosis")
names(factor_is_gene) <- BDLfactors$id
# vector for lookup if only genes were used
gene_only.single <- vector("logical", Nsingle)
for (k in 1:Nsingle){
  gene_only.single[k] <- all(factor_is_gene[t(single.combinations[k,])])
}
rm(k)

```

The single factor data was created consisting of 88572 combinations.

## Double factor per cluster

Create a sample of double combinations from the various clusters.

```
print("Calculating double factor data (~ 1min) ... ")
```

```
[1] "Calculating double factor data (~ 1min) ... "
```

```
ptm <- proc.time()
set.seed(123456)
Ndouble <- 10000
treedata.double <- vector("list", Ndouble) # list for sampled double combinations
for (k in 1:Ndouble){
  # sample from the 4 clusters without replacement
  n1 = sample(cluster.factors[[1]], 2, replace=FALSE)
  n2 = sample(cluster.factors[[2]], 2, replace=FALSE)
  n3 = sample(cluster.factors[[3]], 2, replace=FALSE)
  n4 = sample(cluster.factors[[4]], 2, replace=FALSE)
  n5 = sample(cluster.factors[[5]], 2, replace=FALSE)
  n6 = sample(cluster.factors[[6]], 2, replace=FALSE)
  # The mean of the combination is used (handle NAs)
  tmp <- 0.5 * ( BDLdata.norm[, c(n1[1], n2[1], n3[1], n4[1], n5[1], n6[1])]
               + BDLdata.norm[, c(n1[2], n2[2], n3[2], n4[2], n5[2], n6[2])] )
  # add class and regression values
  tmp[c("class", "logtime")] <- treedata.mean[ c("class", "logtime")]
  # add factor fields
  tmp[ , paste(cluster_names, '.id', sep="")] <- data.frame(paste(n1, collapse="__"),
                                                            paste(n2, collapse="__"),
                                                            paste(n3, collapse="__"),
                                                            paste(n4, collapse="__"),
                                                            paste(n5, collapse="__"),
                                                            paste(n6, collapse="__"))
  colnames(tmp) <- c(cluster_names, 'class', 'regvalue',
                    paste(cluster_names, '.id', sep=""))
  # store data
  treedata.double[[k]] <- tmp
}
rm(k, tmp)
print(proc.time() - ptm)
```

```
user system elapsed
36.120  0.060  36.345
```

The double factor data was created consisting of a random selection of  $10^4$  combinations.

## Prediction on test data

### Single representative predictions

Time class prediction with regression tree for single representative from each cluster



```
print("Predicting single factor data (~ 2min) ... ")
```

```
[1] "Predicting single factor data (~ 2min) ... "
```

```
pred.single.all <- vector("list", length(treedata.single))
for (k in (1:length(treedata.single))){
  # prediction and back transformation
  pred.single.all[[k]] <- log_transform_back( predict(tree.reg, newdata=treedata.single[[k]], method="a
}
pred.single <- do.call("rbind", pred.single.all)

# distance for all predictions on single factor per cluster
dist.single <- rep(NA, Nsingle)
for (k in 1:Nsingle){
  dist.single[k] <- log_distance(pred.single[k,], BDLsamples$time)
}
```

## Double representative predictions

Time class prediction with regression tree for random selection of two representatives from each clusters

```
print("Predicting double factor data (~ 1min) ... ")
```

```
[1] "Predicting double factor data (~ 1min) ... "
```

```
pred.double.all <- vector("list", length(treedata.double))
for (k in (1:length(treedata.double))){
  pred.double.all[[k]] <- log_transform_back( predict(tree.reg, newdata=treedata.double[[k]], method="a
}
pred.double <- do.call("rbind", pred.double.all)

# distance for predictions on 2 sampled factors per cluster
dist.double <- rep(NA, Ndouble)
for (k in 1:Ndouble){
  dist.double[k] <- log_distance(pred.double[k,], BDLsamples$time)
}
```

## Best factor combinations

Finding the best regression trees based on i) all single representatives from the clusters; and ii) single representatives only consisting of gene probes. The best is defined by minimal euclidian distance between experimental classes and predicted classes on the log scale. The best tree is not refitted with the respective factors in the tree, but the mean cluster tree uses the respective factor data for prediction.

```
# Best decision tree using all factors (minimal distance)
dist.rep.best <- min(dist.single)
# best combination of representatives for the clusters (remove duplicates)
rep.best <- unique(single.combinations[which(dist.single==dist.rep.best),
                                           c("c1", "c3", "c4", "c5")])
rep.best.idx <- rownames(rep.best)[1]
```

```

# predictions of best representative
pred.rep.best <- pred.single[as.numeric(rep.best.idx), ]

print("Best single representatives for decision tree:")

```

```
[1] "Best single representatives for decision tree:"
```

```
print(rep.best)
```

```

      c1  c3    c4   c5
16062 Cyp1a2 Fn1 S100a4 Il17a
16084 Cyp1a2 GLDH S100a4 Il17a

```

```
print(dist.rep.best)
```

```
[1] 0.05554854
```

```

# -----
# Best decision tree using only gene factors, i.e. first reduce to the gene combinations
dist.single.genes <- dist.single[gene_only.single]
single.combinations.genes <- single.combinations[gene_only.single,]
dist.gene.best <- min(dist.single.genes)
# find best gene combination
gene.best <- unique(single.combinations.genes[which(dist.single.genes==dist.gene.best),
                                                c("c1", "c3", "c4", "c5")])

# predictions with best representative
gene.best.idx <- rownames(gene.best)
pred.gene.best <- pred.single[as.numeric(gene.best.idx), ]

print("Best single representatives based on genes for decision tree:")

```

```
[1] "Best single representatives based on genes for decision tree:"
```

```
print(gene.best)
```

```

      c1  c3    c4   c5
14808 Cyp1a2 Fn1 Col1a1 Il17a

```

```
print(dist.gene.best)
```

```
[1] 0.06672908
```

```

# -----
# Plot time courses of the representatives/factors in provided tree combinations
plot_tree_representatives <- function(combination){
  Nc <- ncol(combination)
  Nr <- nrow(combination)
  par(mfrow=c(Nr, Nc))
  for (kr in 1:Nr){

```

```

for (kc in 1:Nc){
  cluster <- colnames(combination)[kc]
  name <- as.character(combination[kr, kc])
  plot_single(name)
}
}
par(mfrow=c(1,1))
}

# plot to file
pdf(file.path(resultsPath, "decision_tree", "rep.best.representatives.pdf"),
    width=10, height=6, pointsize=12)
plot_tree_representatives(rep.best)
invisible(dev.off())
pdf(file.path(resultsPath, "decision_tree", "gene.best.representatives.pdf"),
    width=10, height=3, pointsize=12)
plot_tree_representatives(gene.best)
invisible(dev.off())

```

```

plot_tree_representatives(rep.best)

```

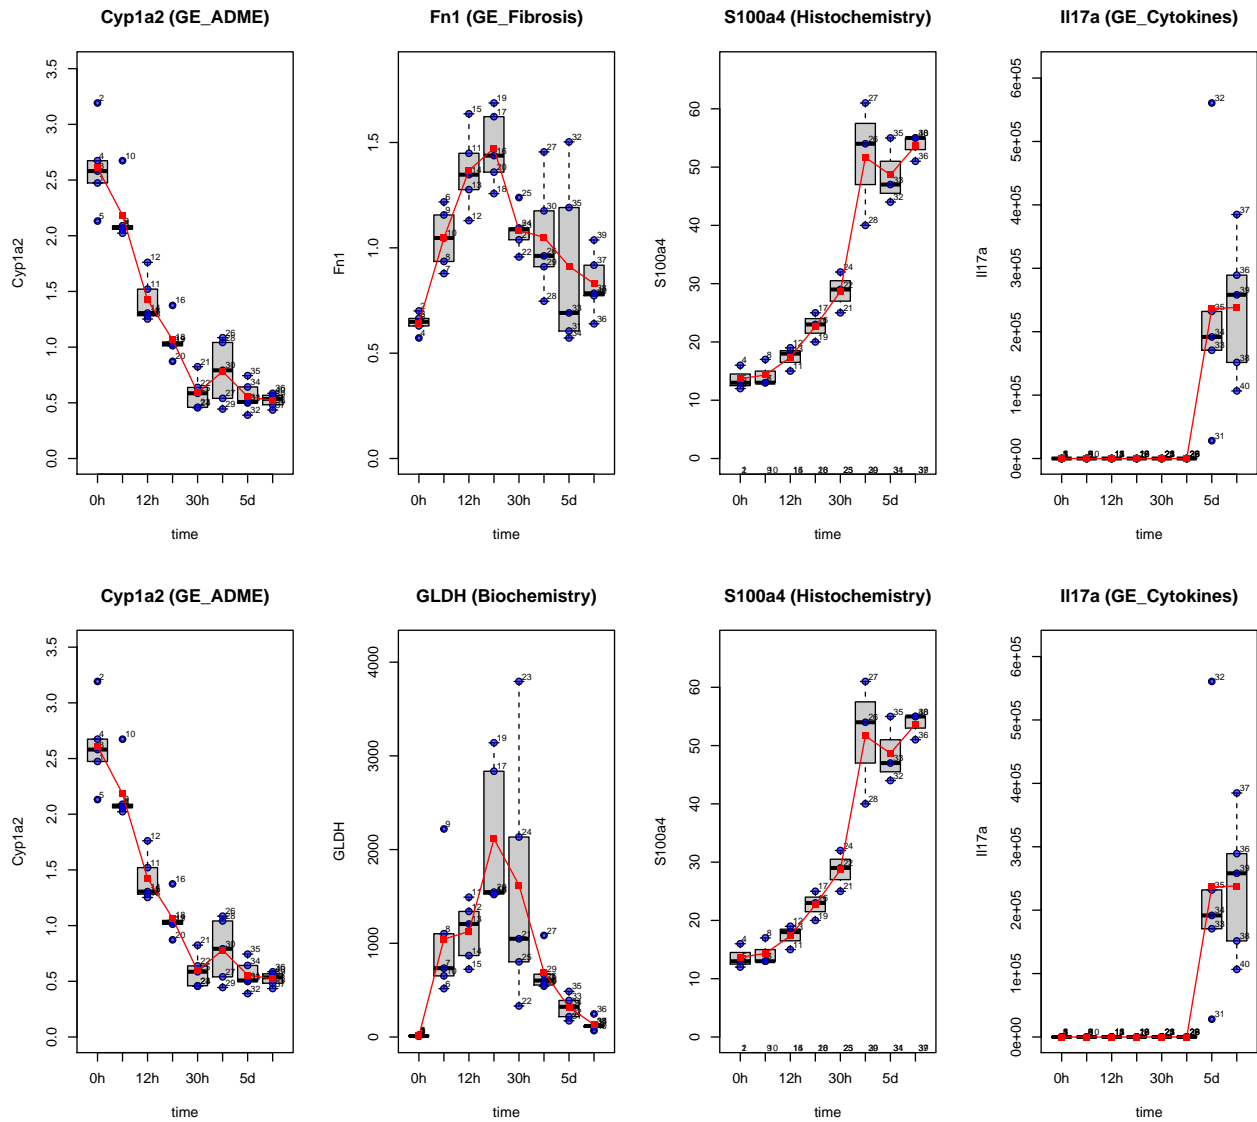

Figure: Best factor combination using all factors. Two alternative solutions for the single factor combinations.

```
plot_tree_representatives(gene.best)
```

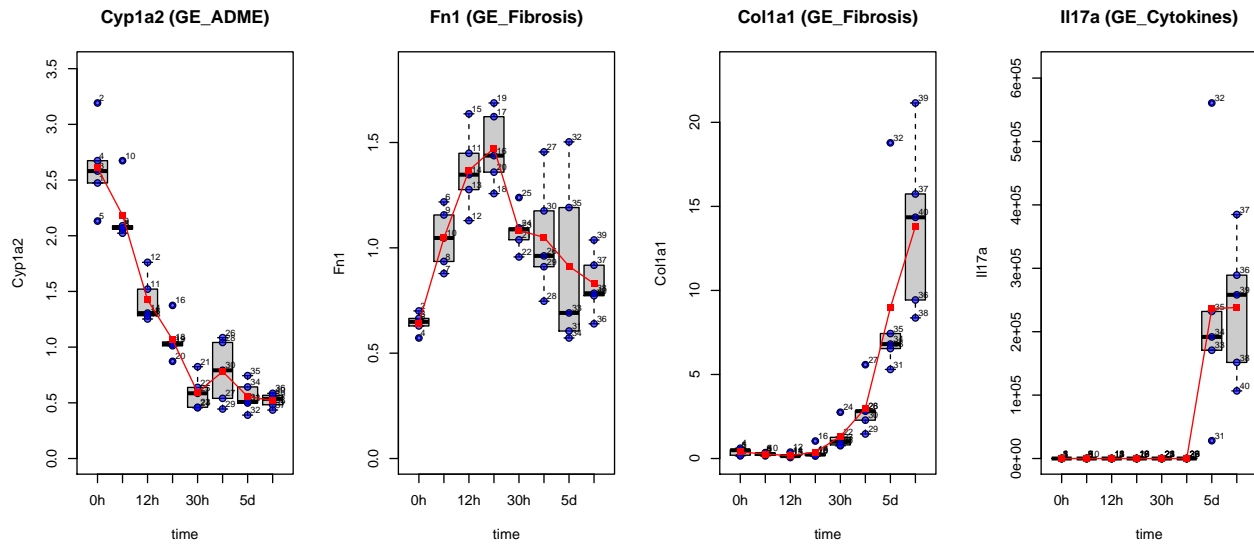

Figure: Best factor combination using transcript factors.

## Prediction errors

Plot the distance distributions of single and double representatives and the best gene and representative trees.

```
# distance histogram
plot_tree_distance_dist <- function(){
  breaks <- seq(from=0, to=0.40, by=0.0125)
  hist(dist.single, freq=FALSE, breaks=breaks,
       main="Prediction error",
       xlab="RMSD(time.predicted, time.exp)",
       col=rgb(0.7,0.7,0.7, 1),
       ylim=c(0,15))
  )
  hist(dist.double, freq=FALSE, breaks=breaks,
       col=rgb(1,0,0, 0.5), add=TRUE)

  abline(v=dist.mean, col=rgb(0,0,1, 0.5), lwd=2)
  abline(v=dist.rep.best, col="black", lwd=2)
  abline(v=dist.gene.best, col="grey", lwd=2)

  legend("topright", legend=c("single factor", "double factor", "mean cluster"),
        col=c(rgb(0.7, 0.7, 0.7, 1),rgb(1, 0, 0, 0.5),rgb(0, 0, 1, 0.5)),
        bty="n", cex=1.0, pch=15)
}
# plot to file
pdf(file.path(resultsPath, "decision_tree", "tree_distance_distribution.pdf"),
    width=10, height=6, fontsize=14)
plot_tree_distance_dist()
invisible(dev.off())
```

```
plot_tree_distance_dist()
```

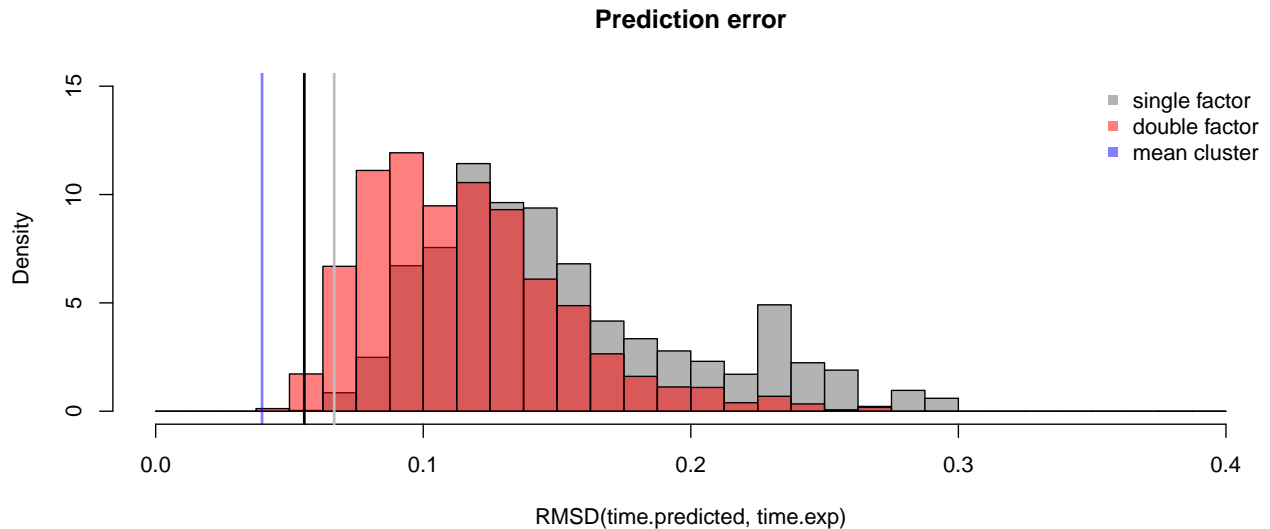

Figure: Prediction error of regression tree. Distribution of distances for single factor combinations, double factor combinations, mean cluster data, best gene factor combination, and best all factor combination. Adding additional factors to the prediction improves the predictions.

## Predictive performance

Evaluation of the predictive performance of the regression trees by analysing which time points are predicted in which time classes. I.e. which experimental classes were predicted in which time classes of the regression tree for the mean cluster data (trainings data), single representative from each clusters and double representatives from each cluster.

```
# Predicted classes of the regression tree
node_levels <- levels(as.factor(pred.mean))
node_classes <- round(as.numeric(node_levels), digits=1)

# Plot of the predicted classes with the decision tree
plot_predicted_classes <- function(){
  # bar_colors <- brewer.pal(4, "Set3")
  bar_colors <- c(rgb(0.9,0.9,0.9),
                 rgb(0.7,0.7,0.7),
                 rgb(1,0,0, 0.5),
                 rgb(0,0,1, 0.5))
  par(mfrow=c(2,4))
  for (k in 1:Nt){
    # single factor predictions
    data <- as.vector(pred.single[, ((1:Nr)+Nr*(k-1))])
    tab.single <- table(factor(data, levels=node_levels))/length(data)
    # two factor predictions
    data <- as.vector(pred.double[, ((1:Nr)+Nr*(k-1))])
    tab.double <- table(factor(data, levels=node_levels))/length(data)
    # mean cluster predictions
    data <- as.vector(pred.mean[ ((1:Nr)+Nr*(k-1)) ])
    tab.mean <- table(factor(data, levels=node_levels))/length(data)
    # best single gene representative
    data <- as.vector(pred.gene.best[ ((1:Nr)+Nr*(k-1)) ])
    tab.gene.best <- table(factor(data, levels=node_levels))/length(data)
  }
}
```

```

# combined table
tab <- rbind(tab.single, tab.double, tab.gene.best, tab.mean)
colnames(tab) <- round(as.numeric(colnames(tab)), digits=1)

# create the bar plot
name <- sprintf("Time after BDL: %sh", levels(as.factor(BDLsamples$time))[k])
barplot(tab, beside=TRUE,
        main=name,
        xlab="predicted time class [h]", ylab="fraction of predictions",
        ylim=c(0,1), col=bar_colors)
if (k==1){
  legend("topright", legend=c("single factors", "double factors",
                              "best single gene", "mean cluster"),
        col=bar_colors,
        bty="n", cex=1.0, pch=15)
}
}
}
par(mfrow=c(1,1))
}

```

```
plot_predicted_classes()
```

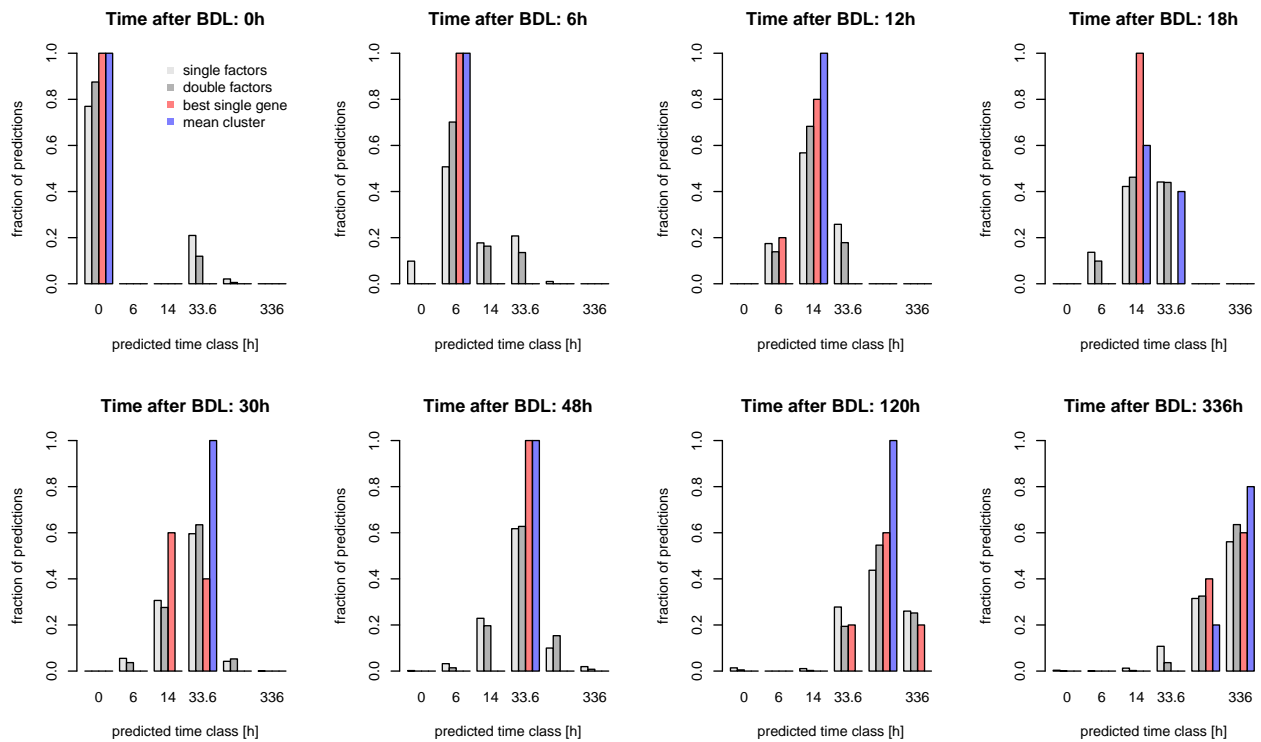

Figure: Prediction performance of regression tree.

```

# reverse bar plot
library(plyr)
library(reshape2)

# which experiments are predicted in which class

```

```

plot_predicted_classes2 <- function(){
  bar_colors <- c(rgb(1,1,1),
                  rgb(0.8,0.8,0.8),
                  rgb(1,0,0, 0.5),
                  rgb(0,0,1, 0.5))

  # single
  df <- data.frame(exp=rep(BDLsamples$time, Nsingle),
                   pre=as.vector(t(round(pred.single, digits=1))) )
  tmp <- count(df, c("exp", "pre"))
  tab.single <- acast(tmp, exp~pre, value.var="freq", fill=0)
  # double
  df <- data.frame(exp=rep(BDLsamples$time, Ndouble),
                   pre=as.vector(t(round(pred.double, digits=1))) )
  tmp <- count(df, c("exp", "pre"))
  tab.double <- acast(tmp, exp~pre, value.var="freq", fill=0)
  # best gene
  df <- data.frame(exp=rep(BDLsamples$time, 1),
                   pre=as.vector(t(round(pred.gene.best, digits=1))) )
  tmp <- count(df, c("exp", "pre"))
  tab.gene.best <- acast(tmp, exp~pre, value.var="freq", fill=0)
  # mean cluster
  df <- data.frame(exp=rep(BDLsamples$time, 1),
                   pre=as.vector(t(round(pred.mean, digits=1))) )
  tmp <- count(df, c("exp", "pre"))
  tab.mean <- acast(tmp, exp~pre, value.var="freq", fill=0)

  par(mfrow=c(2,3))
  for (k in 1:length(node_classes)){
    # combined table (normalized within each class)
    tab <- rbind(tab.single[,k]/sum(tab.single[,k]),
                 tab.double[,k]/sum(tab.double[,k]),
                 tab.gene.best[,k]/sum(tab.gene.best[,k]),
                 tab.mean[,k]/sum(tab.mean[,k]))

    # create the bar plot
    name <- sprintf("Predicted: %sh", node_classes[k])
    barplot(tab, beside=TRUE,
            main=name,
            xlab="time after BDL [h]", ylab="fraction",
            ylim=c(0,1), col=bar_colors)
    if (k==1){
      legend("topright", legend=c("single factors", "double factors",
                                  "best gene", "mean cluster"),
            col=bar_colors,
            bty="n", cex=1.0, pch=15)
    }
  }
  par(mfrow=c(1,1))
}

# barplot to file
pdf(file.path(resultsPath, "decision_tree", "predicted_classes2.pdf"),
    width=12, height=7.5, pointsize=14)

```



```
plot_predicted_classes2()
invisible(dev.off())
```

```
plot_predicted_classes2()
```

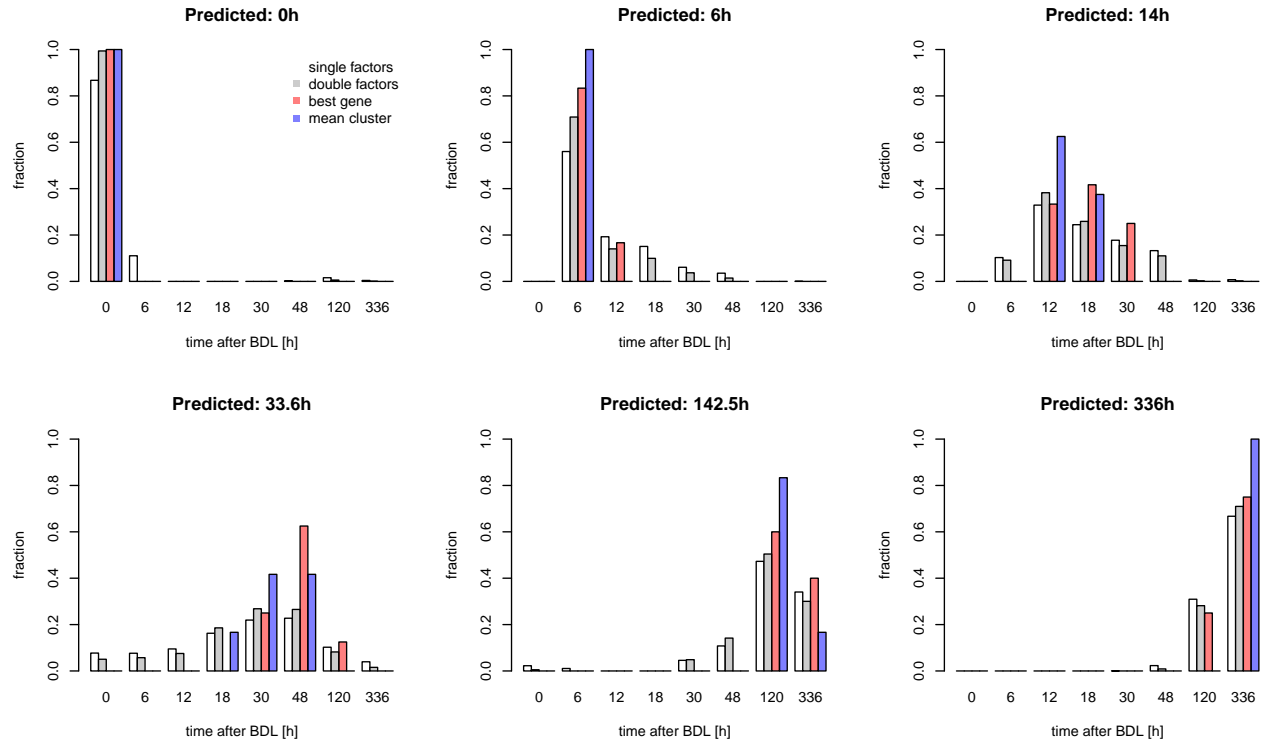

Figure: Prediction performance of regression tree.
